# Supplementary material for: Nickel-catalyzed enantioselective umpolung hydrogenation for stereoselective synthesis of β-amido esters
Source: Royal Society of Chemistry journal article supplement (doi:10.1039/d1cc05257h), 2021-01-01

Supporting Information

**Nickel-Catalyzed Enantioselective Umpolung Hydrogenation for Stereoselective Synthesis of  $\beta$ -Amido Esters**

Siyu Guo, Xiaohu Zhao, Yonggui Robin Chi and Jianrong Steve Zhou\*

State Key Laboratory of Chemical Oncogenomics, Key Laboratory of Chemical Genomics, School of Chemical Biology and Biotechnology, Peking University Shenzhen Graduate School, Room F312, 2199 Lishui Road, Nanshan District, Shenzhen 518055, China. E-mail: jrzhou@pku.edu.cn

Division of Chemistry and Biological Chemistry, School of Physical and Mathematical Sciences  
Nanyang Technological University, 21 Nanyang Link, SPMS-CBC-06-03, Singapore 637371.

NMR spectra

7.37  
7.37  
7.36  
7.35  
7.35  
7.34  
7.33  
7.31  
7.30  
7.29  
7.29  
7.28  
7.27  
7.27  
7.26  
7.26  
6.69  
6.67

5.47  
5.45  
5.45  
5.44  
5.43  
5.42

3.63

2.98  
2.96  
2.94  
2.92  
2.88  
2.86  
2.84  
2.83

$^1\text{H}$  NMR (400 MHz,  $\text{CDCl}_3$ )

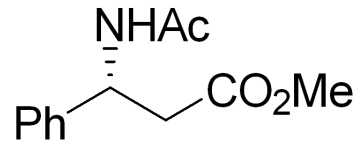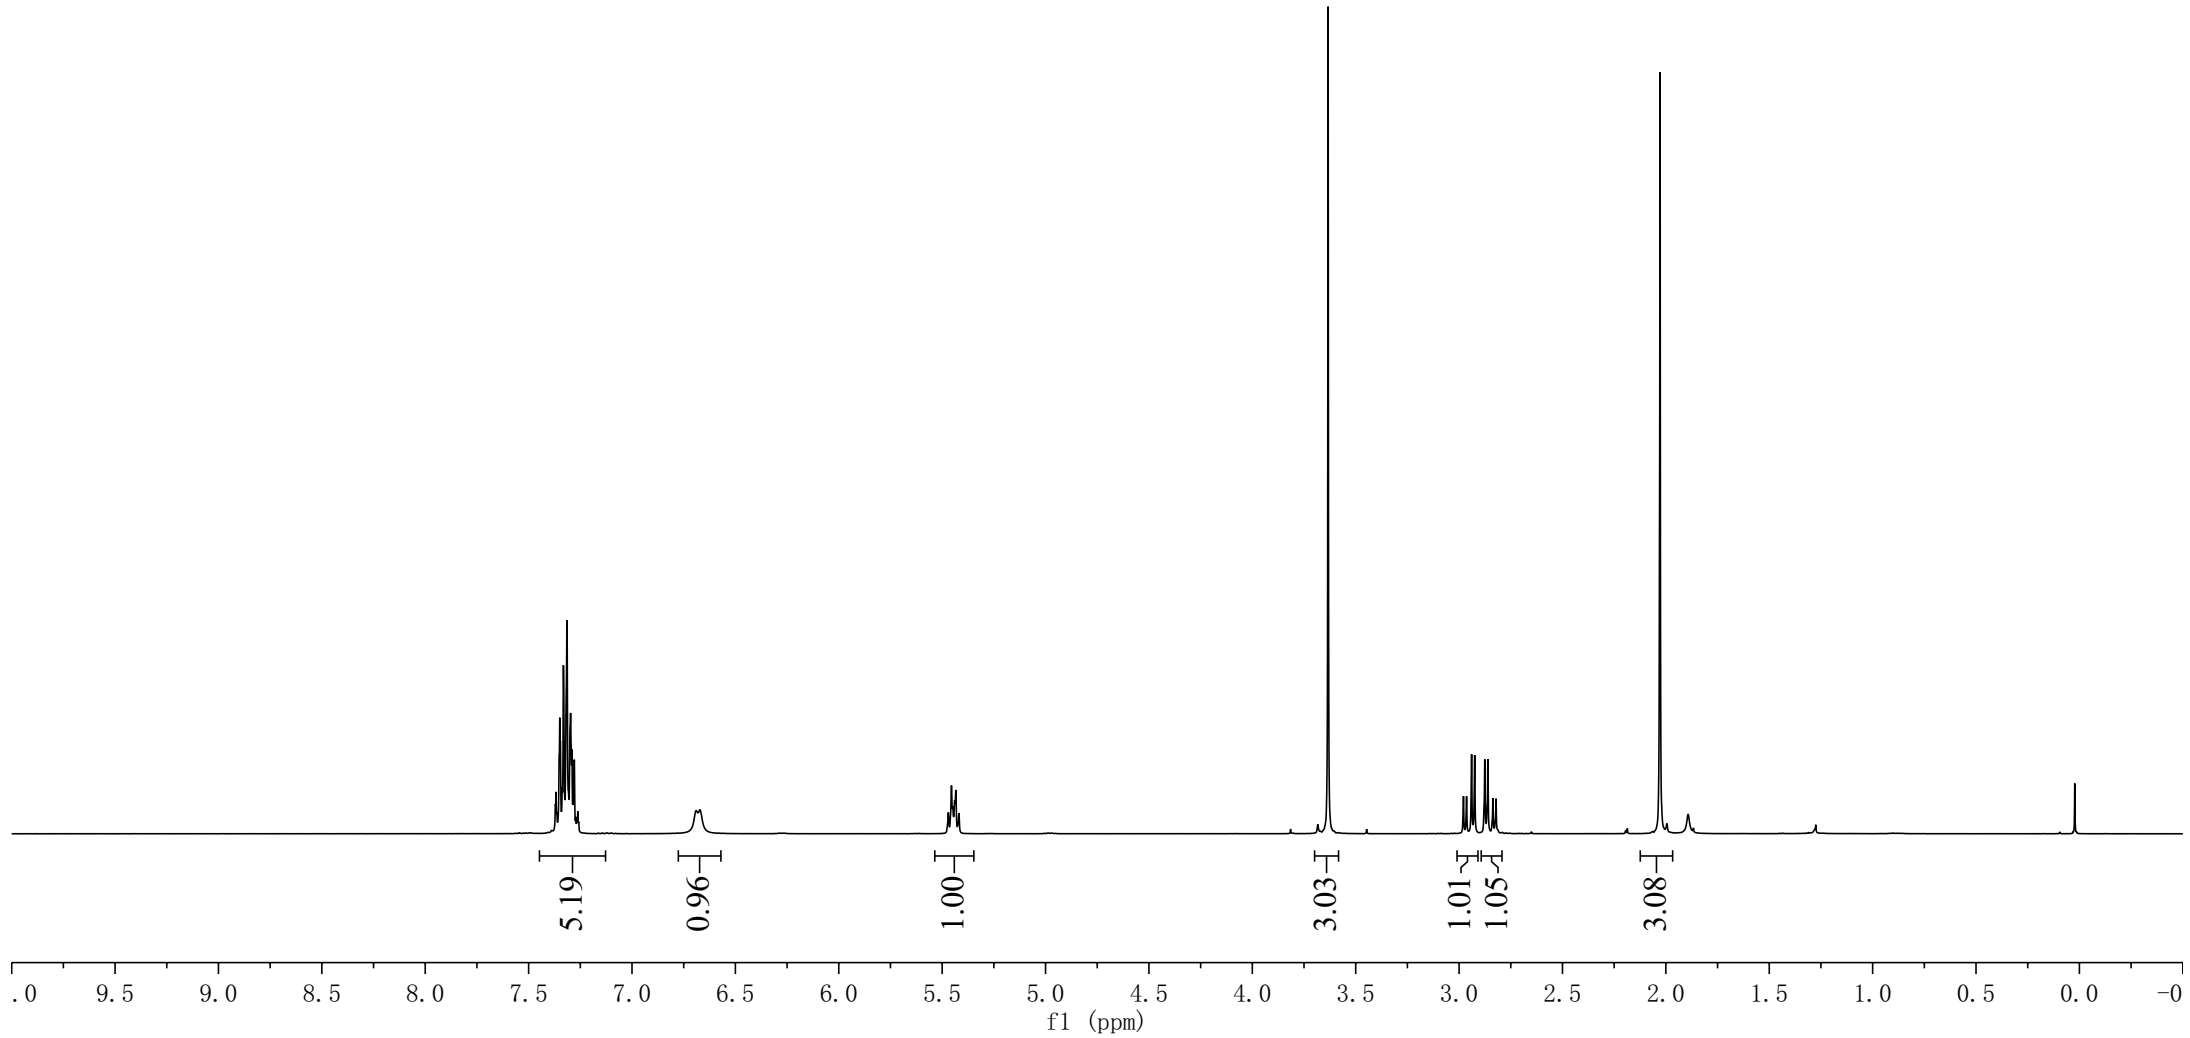

7.35  
7.34  
7.34  
7.32  
7.32  
7.31  
7.31  
7.30  
7.28  
7.28  
7.27  
7.27  
7.27  
7.26  
7.25  
7.25  
7.24  
6.67  
6.65

5.45  
5.43  
5.43  
5.42  
5.41  
5.40

4.09  
4.07  
4.05  
4.04

2.94  
2.92  
2.90  
2.88  
2.84  
2.82  
2.80  
2.78

-2.01

1.18  
1.16  
1.14

<sup>1</sup>H NMR (400 MHz, CDCl<sub>3</sub>)

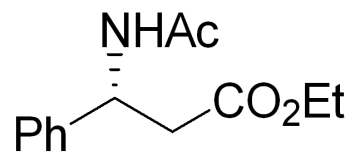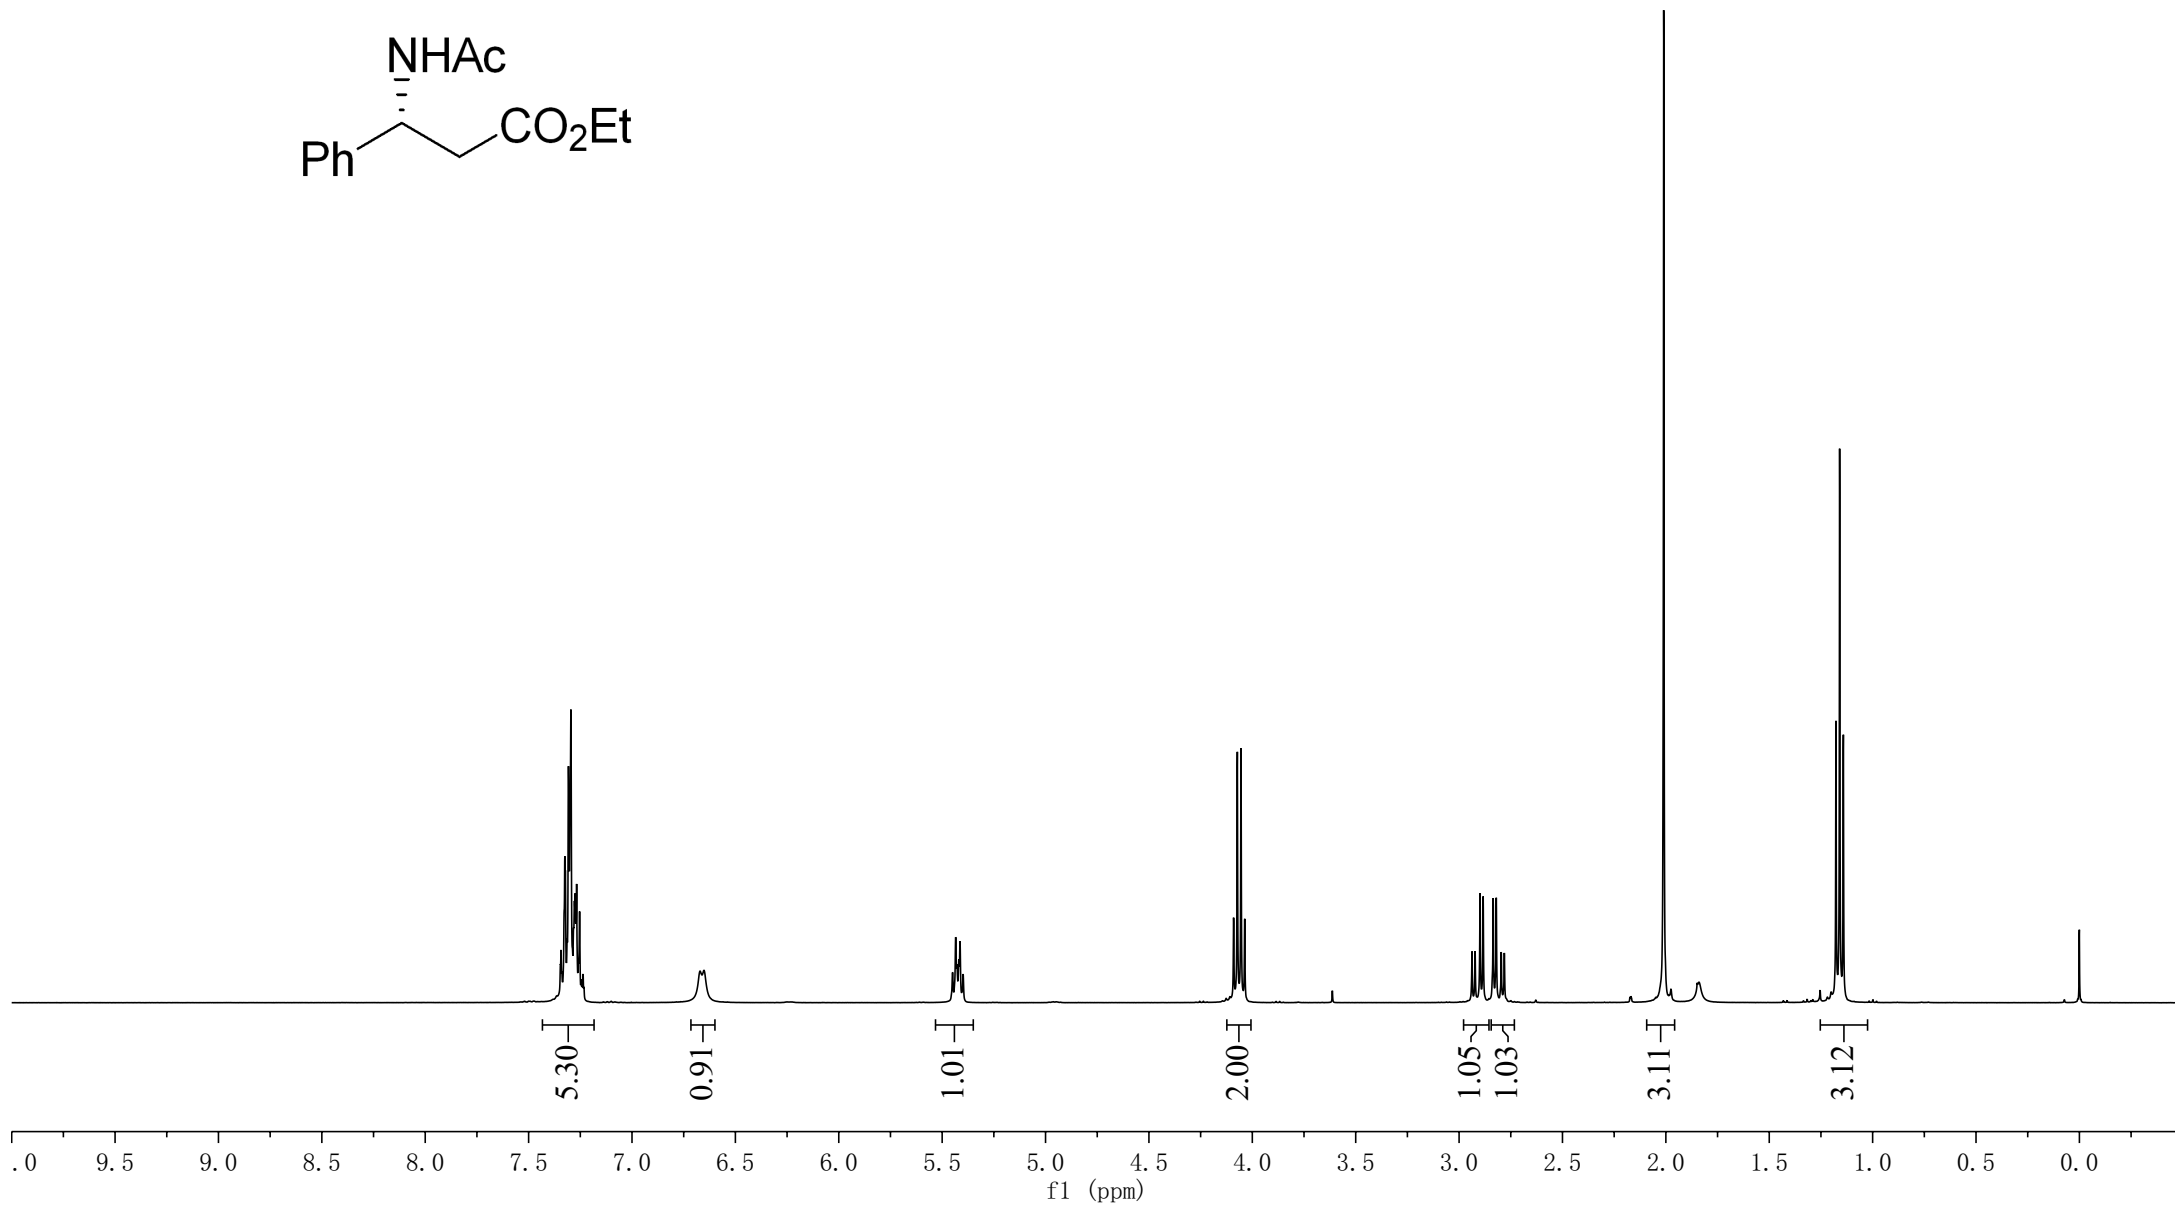

7.81  
7.80  
7.79  
7.79  
7.78  
7.73  
7.48  
7.47  
7.47  
7.46  
7.45  
7.45  
7.41  
7.40  
7.39  
7.38  
6.88  
6.88  
6.86  
6.83  
6.81

5.61  
5.59  
5.58  
5.57  
5.55

3.59

3.03  
3.02  
2.99  
2.98  
2.93  
2.91  
2.89  
2.82

$^1\text{H}$  NMR (400 MHz,  $\text{CDCl}_3$ )

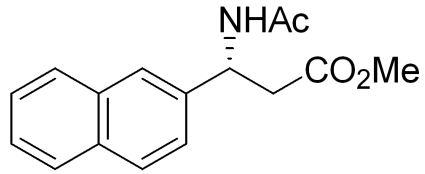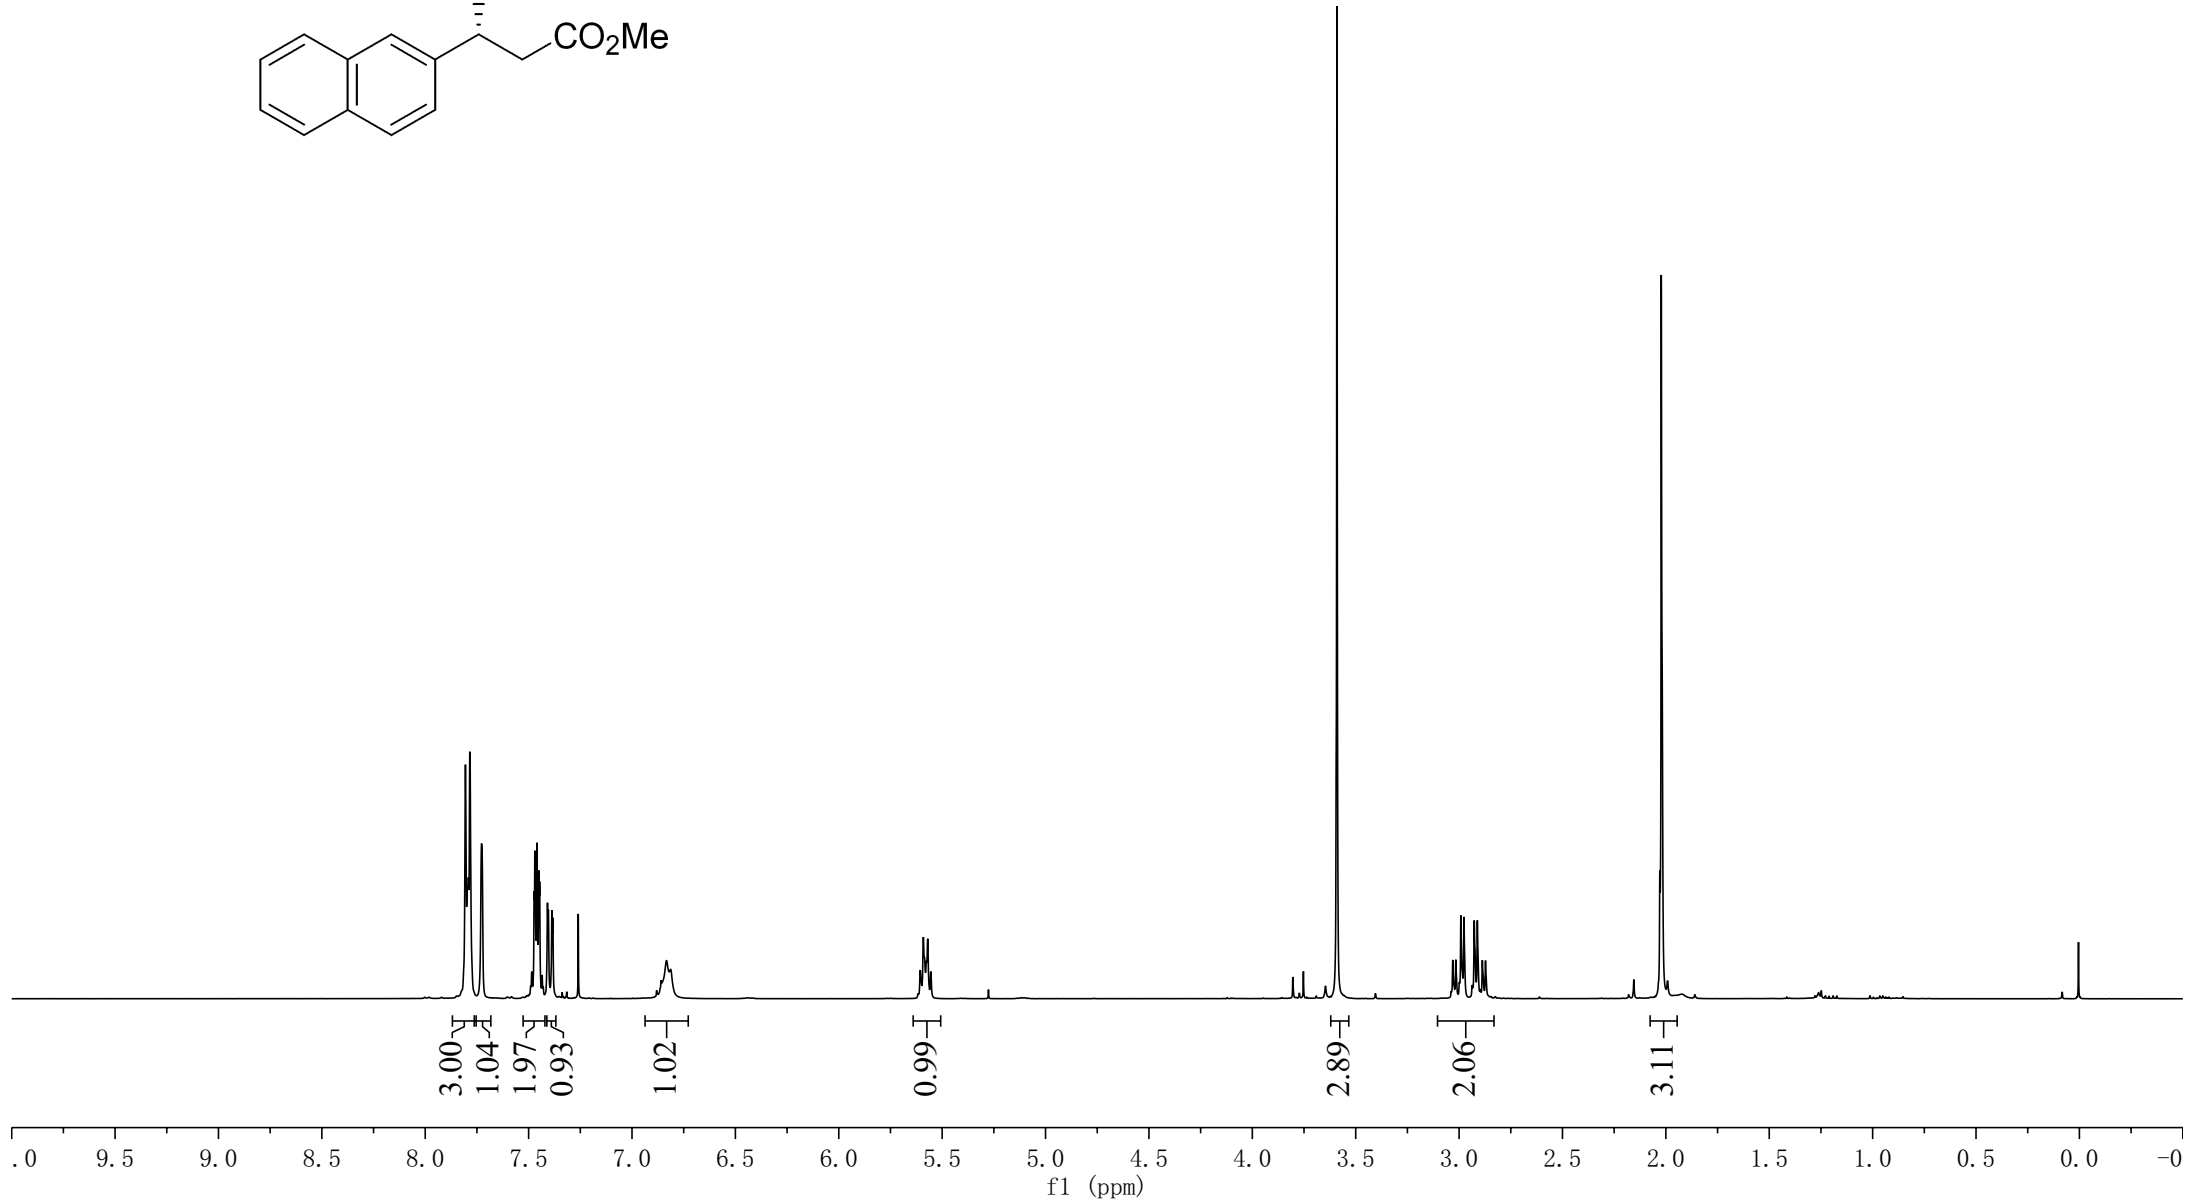

$^1\text{H}$  NMR (400 MHz,  $\text{CDCl}_3$ )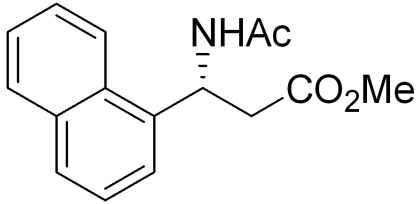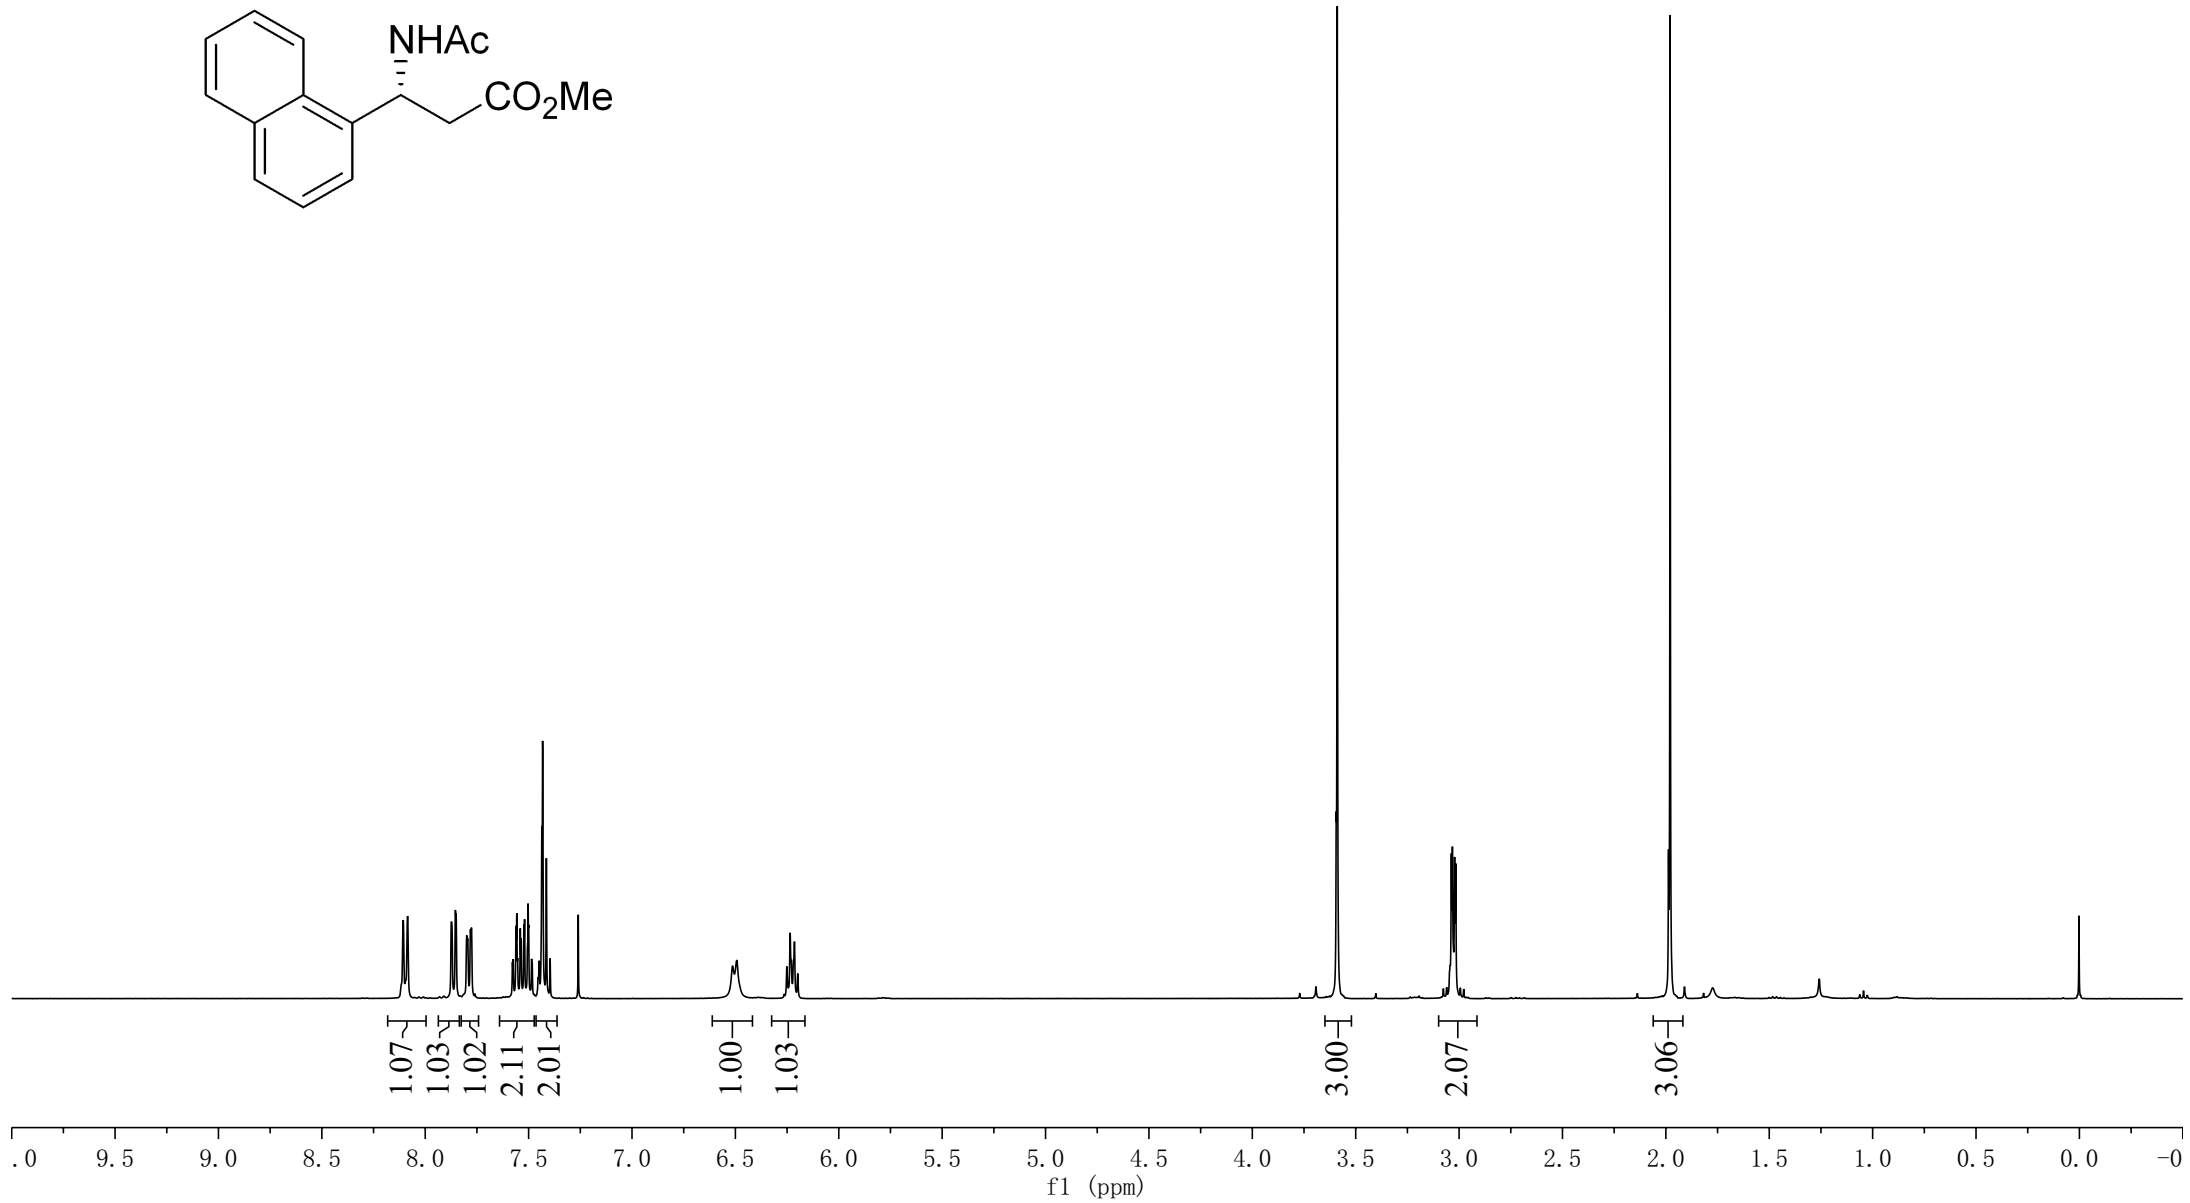

<sup>1</sup>H NMR (400 MHz, CDCl<sub>3</sub>)

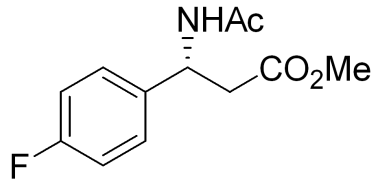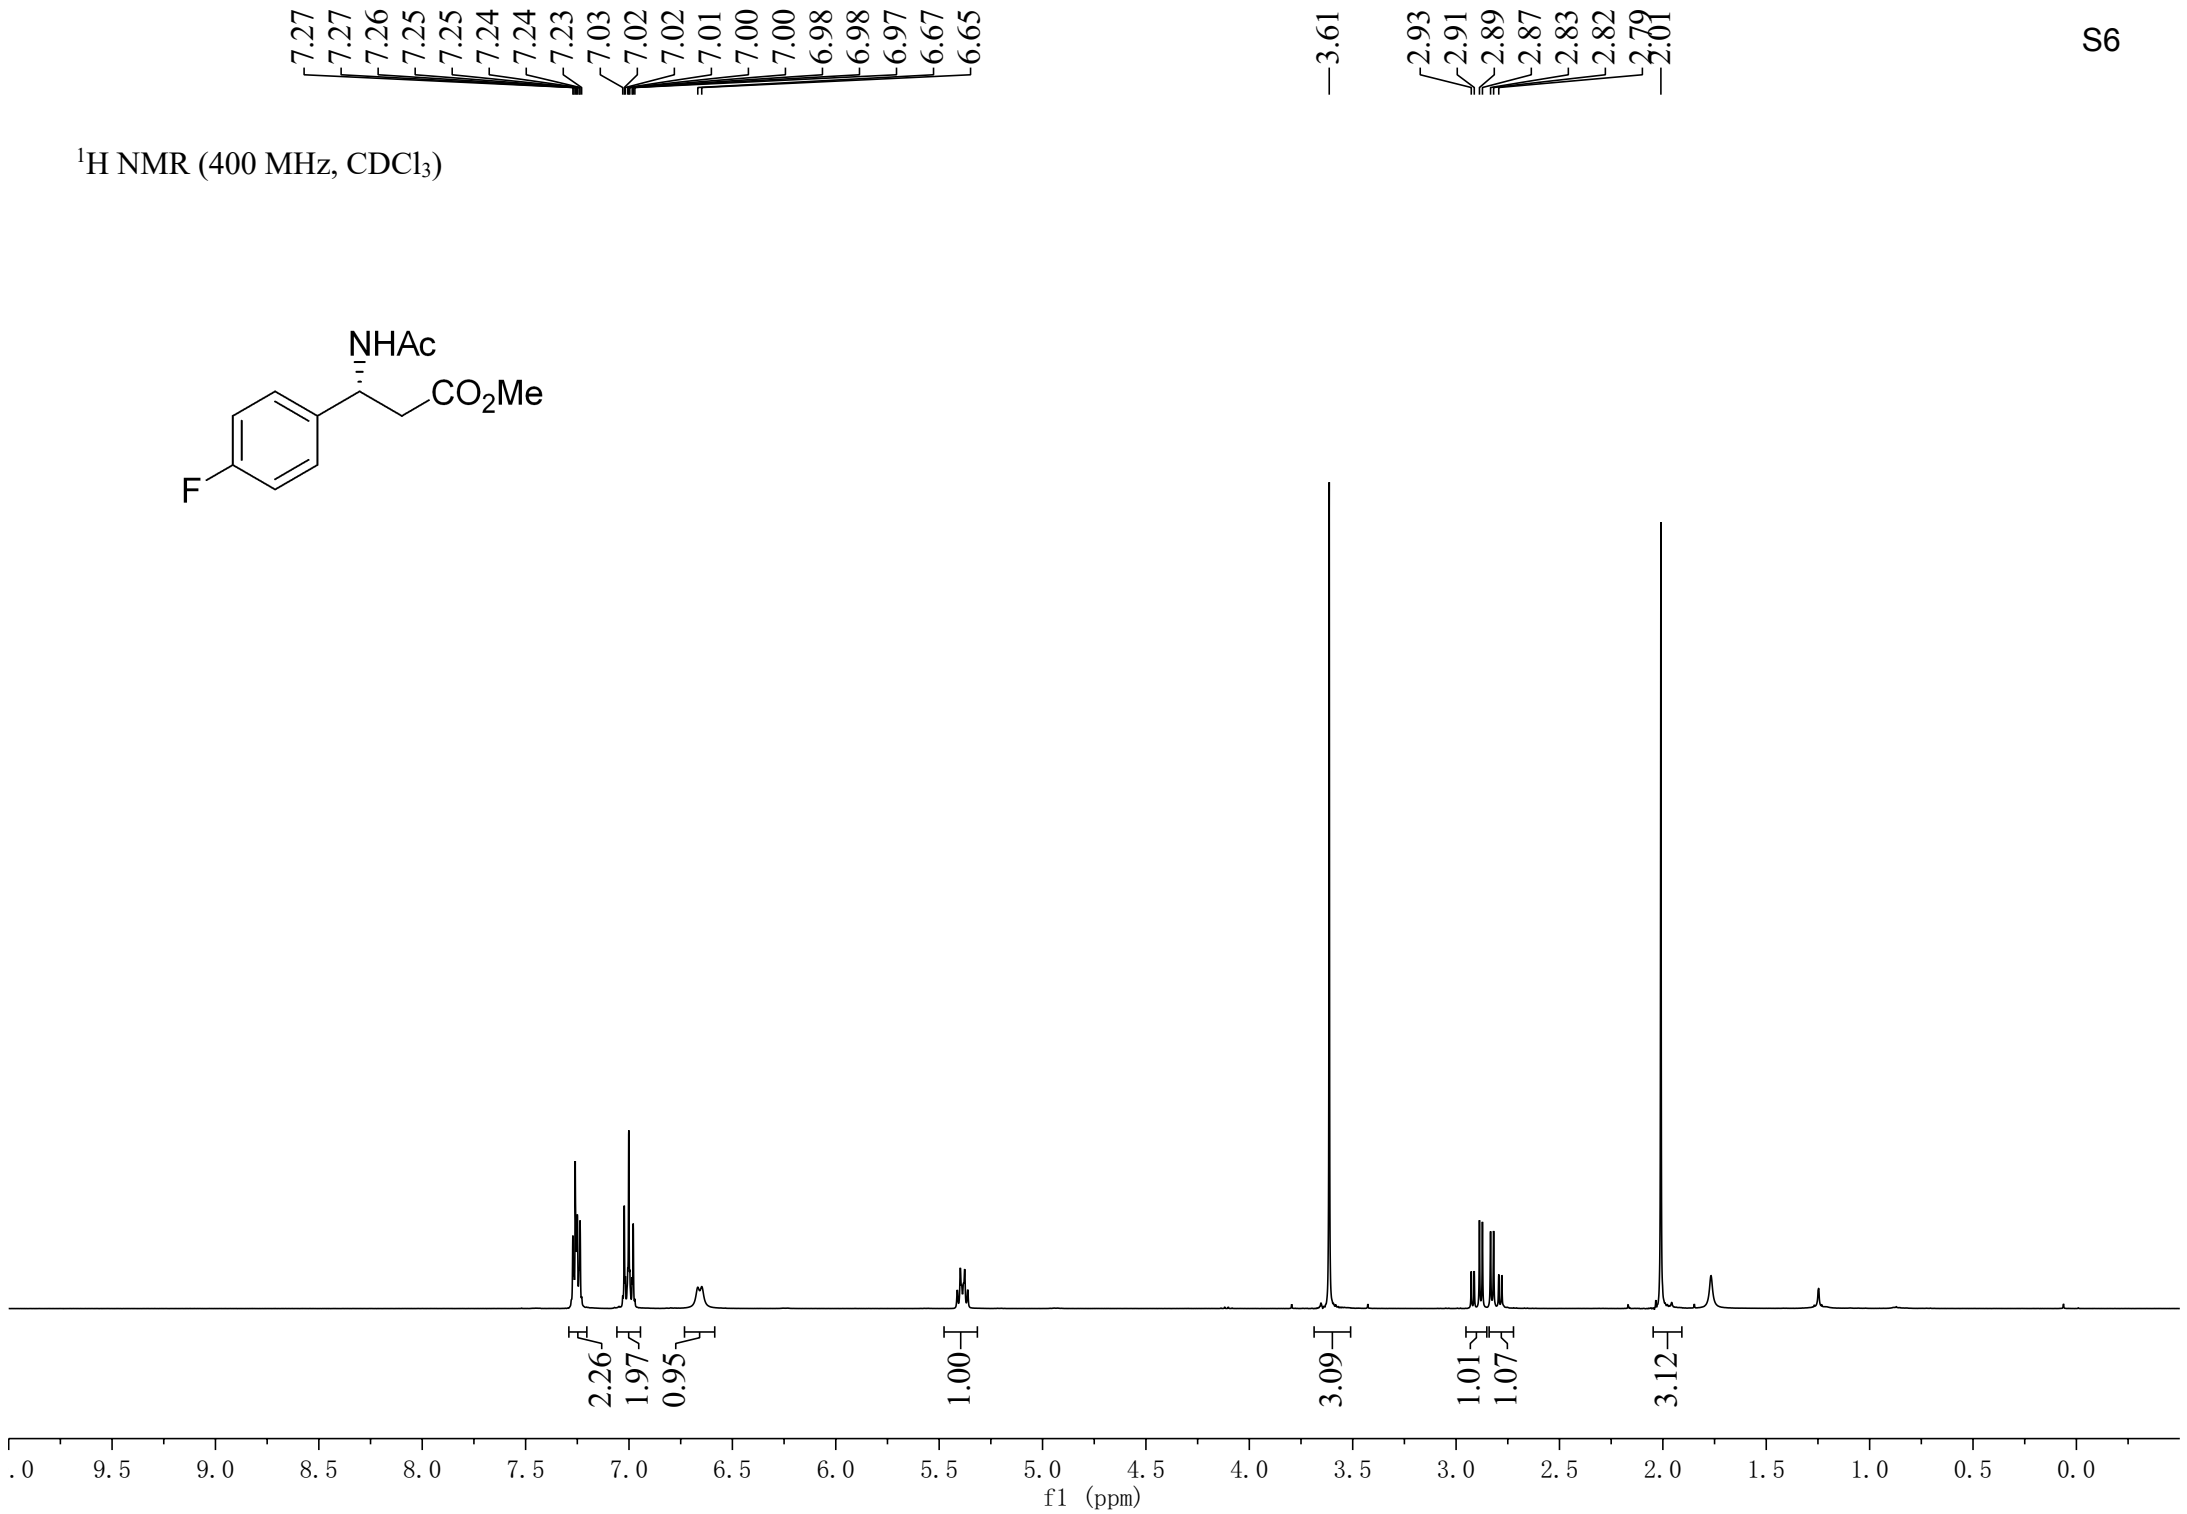

$^1\text{H}$  NMR (400 MHz,  $\text{CDCl}_3$ )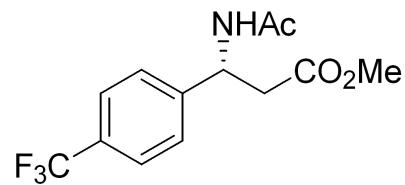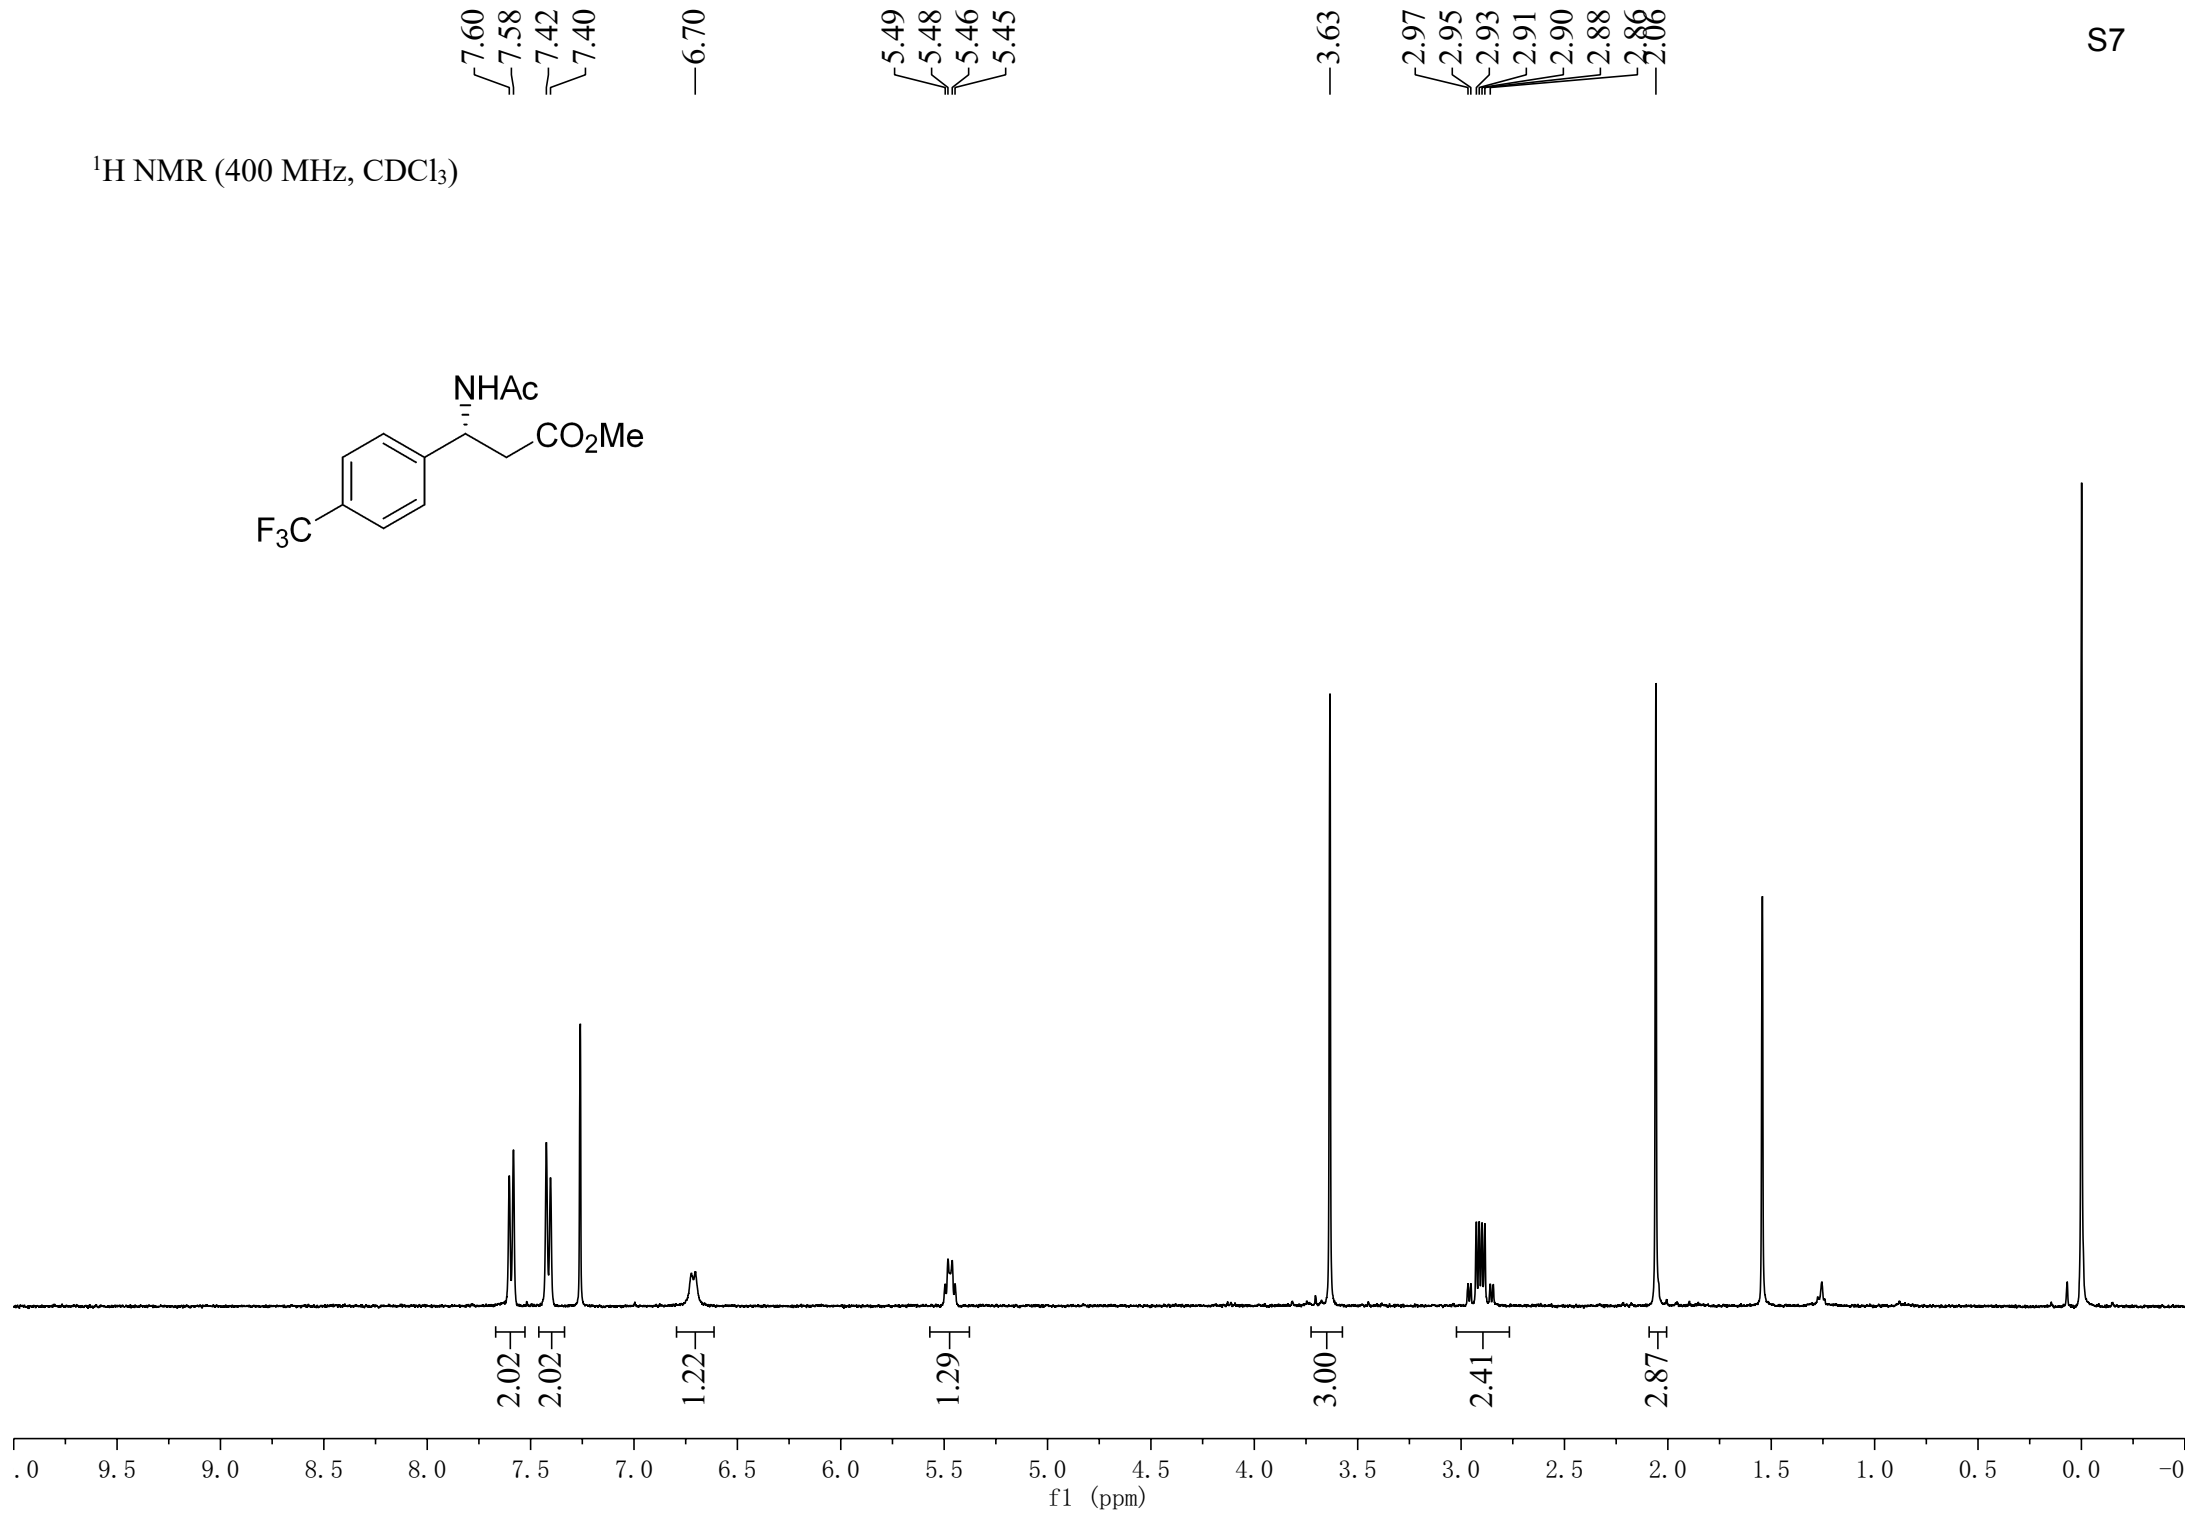

$^1\text{H}$  NMR (400 MHz,  $\text{CDCl}_3$ )

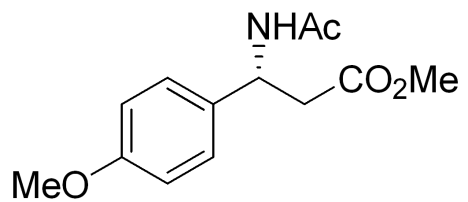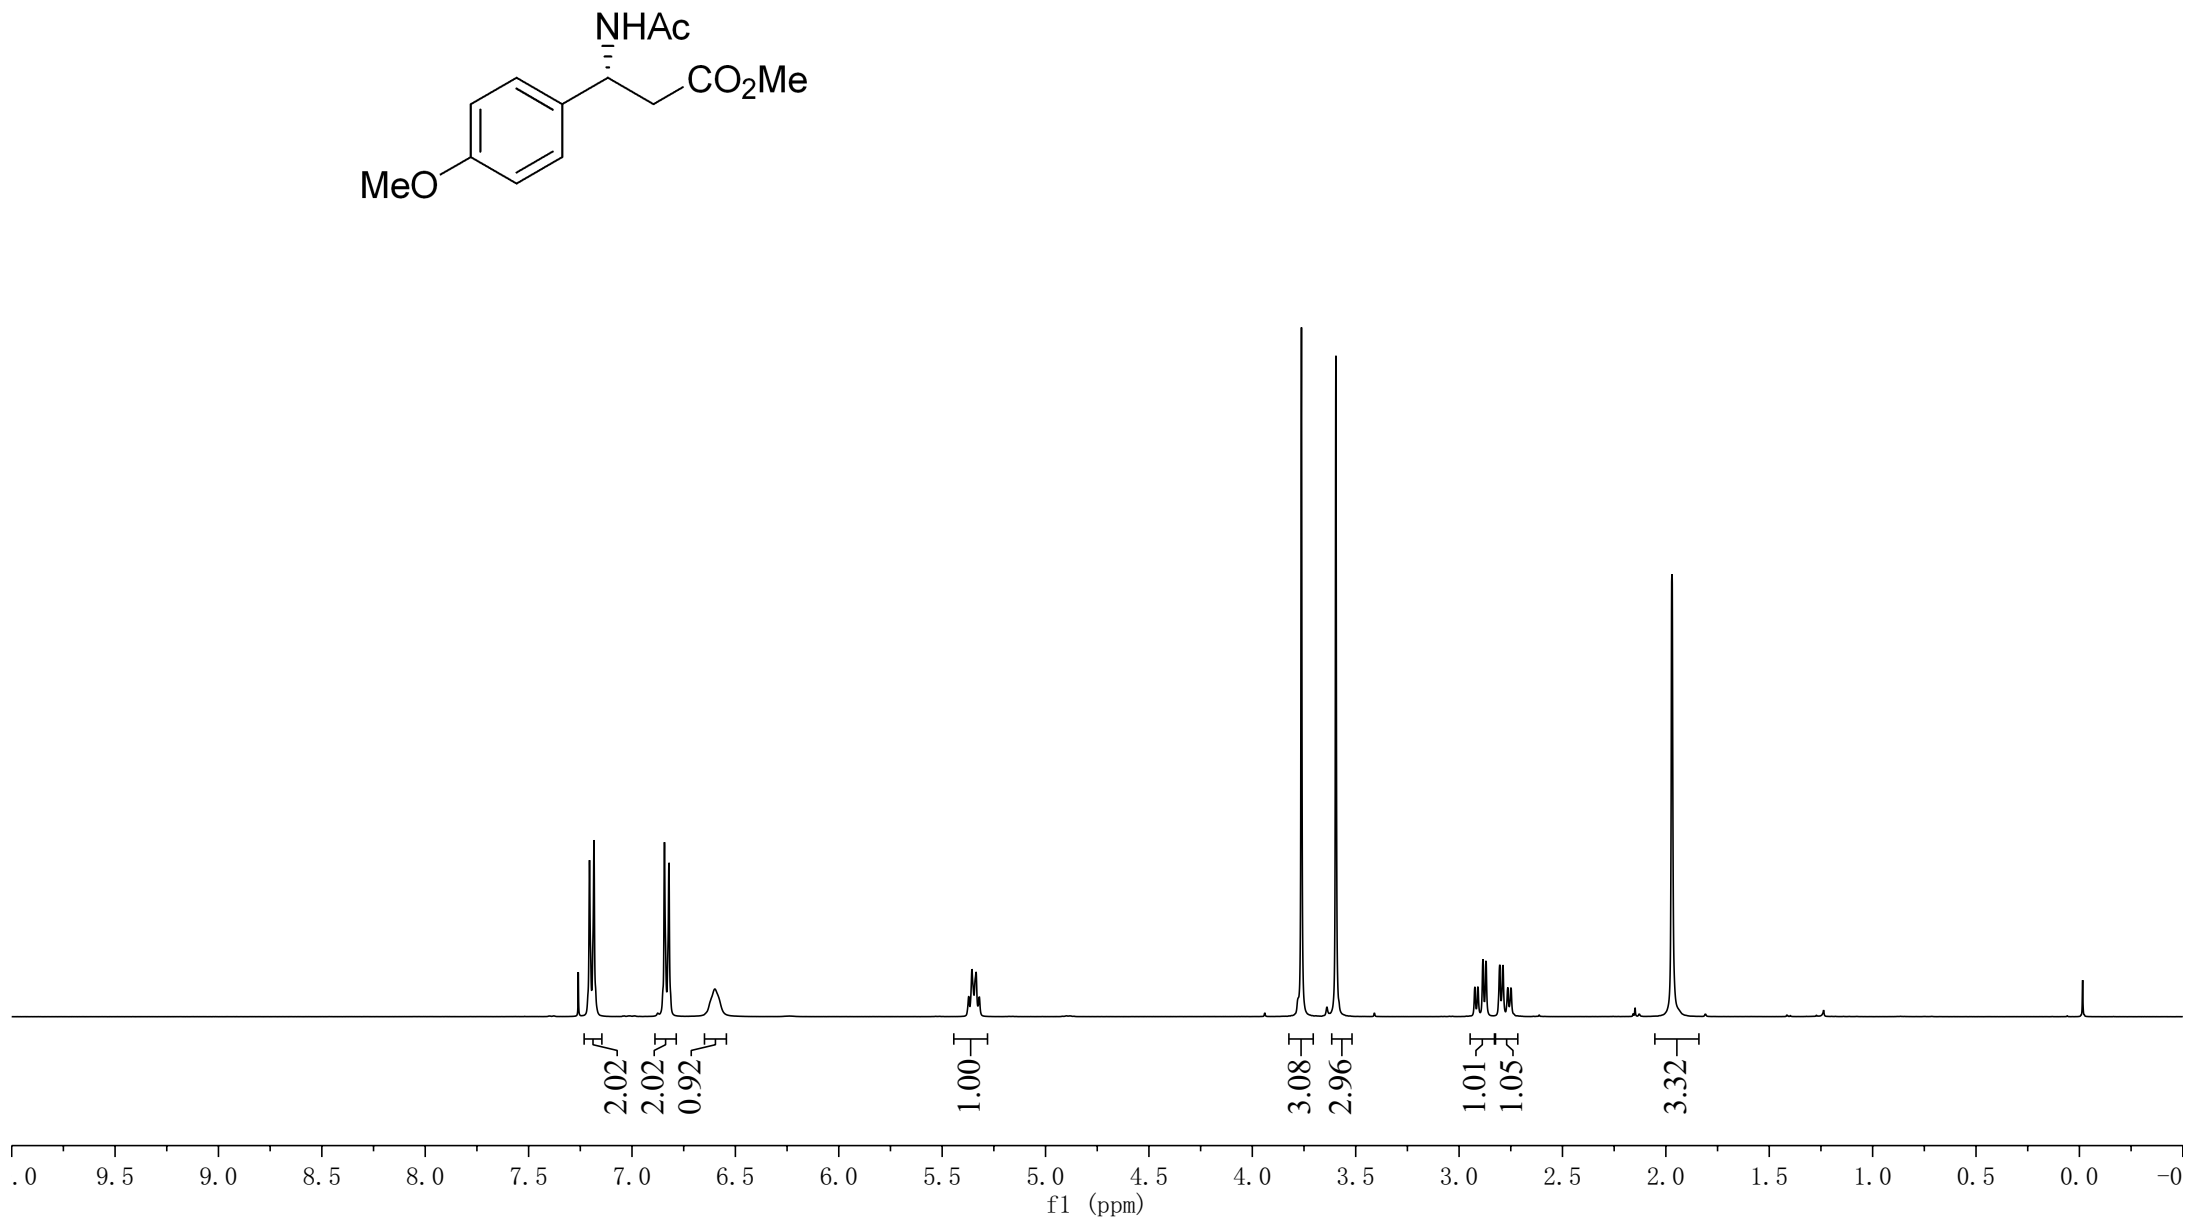



<sup>1</sup>H NMR (400 MHz, CDCl<sub>3</sub>)

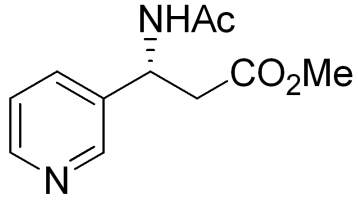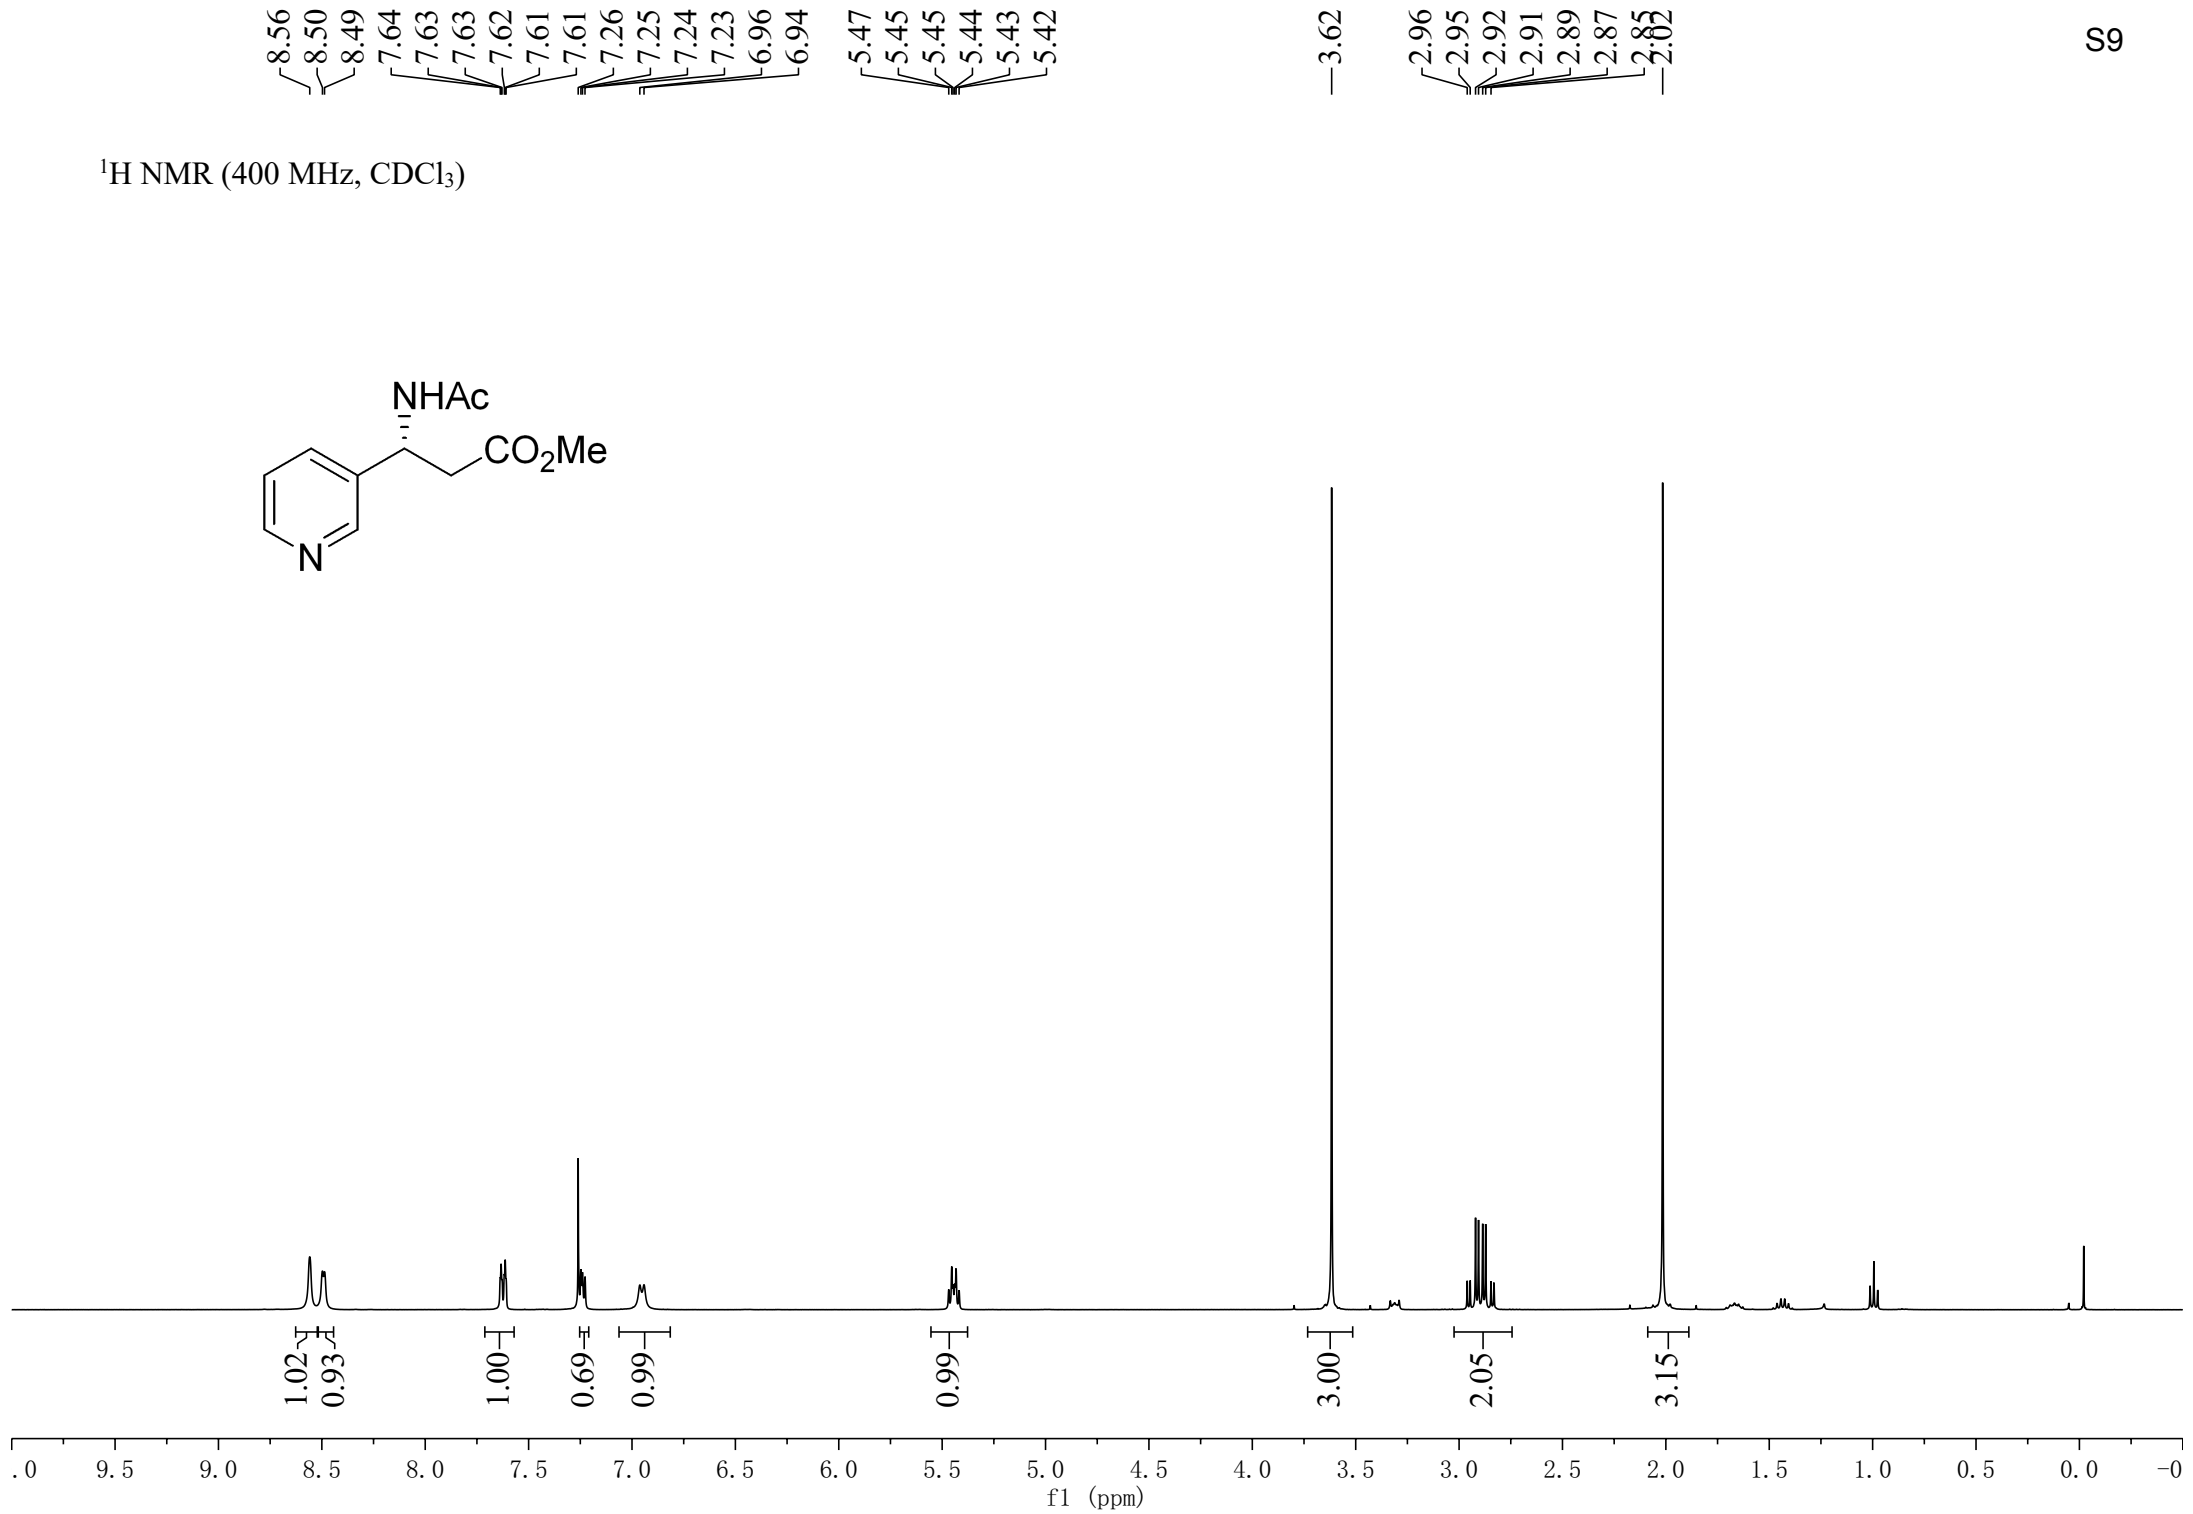

7.82  
7.81  
7.80  
7.80  
7.69  
7.68  
7.68  
7.67  
7.55  
7.55  
7.53  
7.35  
7.33  
7.33  
7.32  
7.31  
7.29  
7.29  
7.29  
7.27  
7.26  
5.86  
5.85  
5.83  
5.82

4.10  
4.09  
4.08  
4.07  
4.06  
4.05  
3.82  
3.80  
3.78  
3.76  
3.75  
3.25  
3.23  
3.21

1.16  
1.14  
1.12

<sup>1</sup>H NMR (400 MHz, CDCl<sub>3</sub>)

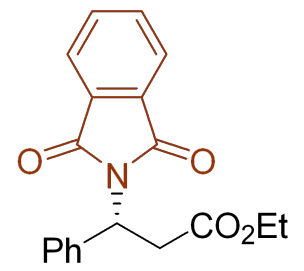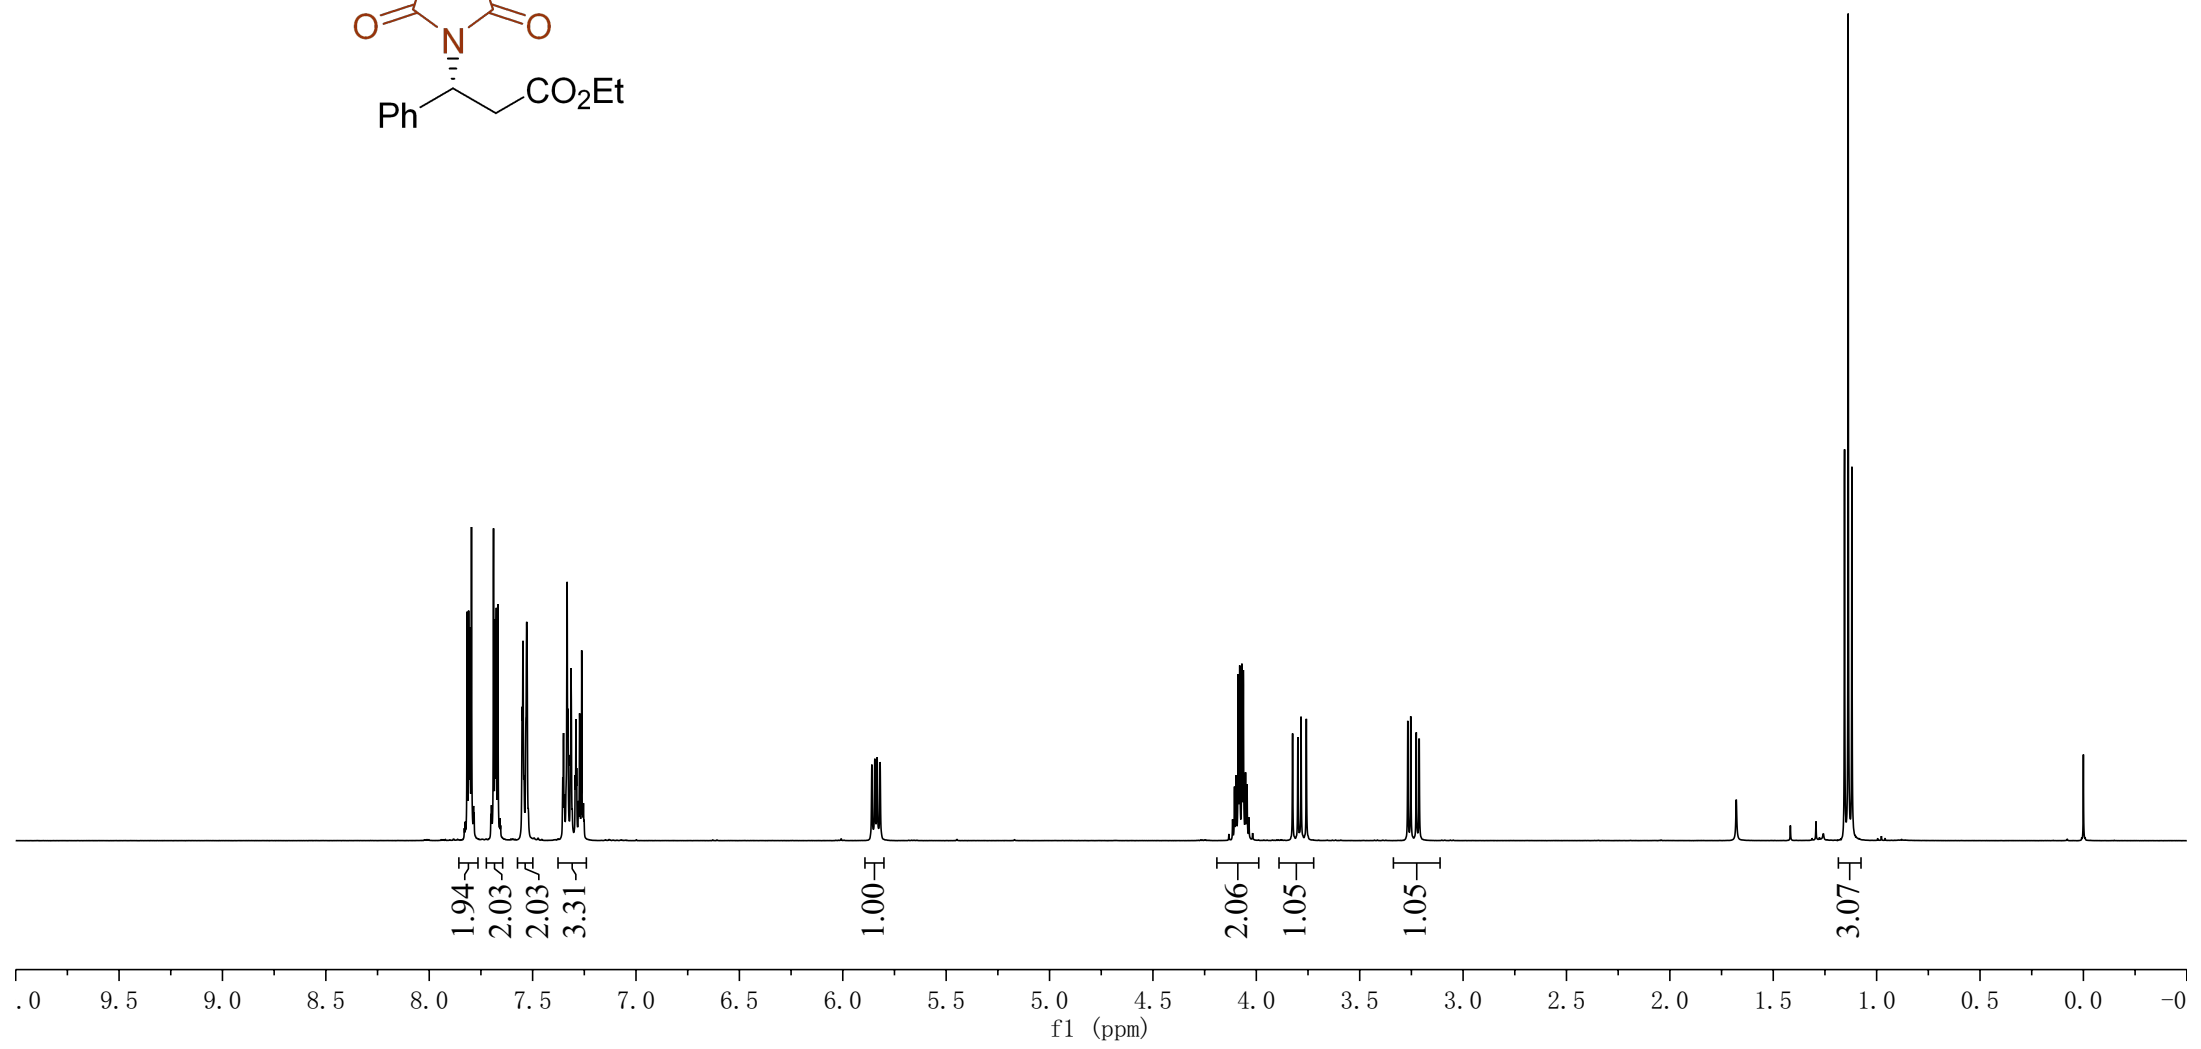

<sup>1</sup>H NMR (400 MHz, CDCl<sub>3</sub>)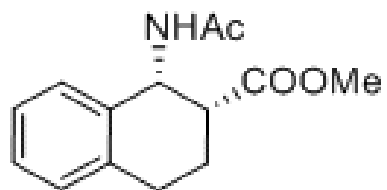

7.302  
7.295  
7.284  
7.280  
7.272  
7.260  
7.194  
7.184  
7.175  
7.170  
7.161  
7.152  
7.095  
7.085  
7.077  
7.072  
7.063  
6.254  
6.230  
5.567  
5.555  
5.543  
5.531  
3.687  
3.063  
3.051  
3.032  
2.817  
2.736  
2.186  
2.171  
2.160  
2.151  
2.139  
2.134  
2.128  
2.123  
2.116  
2.112  
2.106  
2.100  
2.095  
2.089  
2.076  
2.071  
2.014

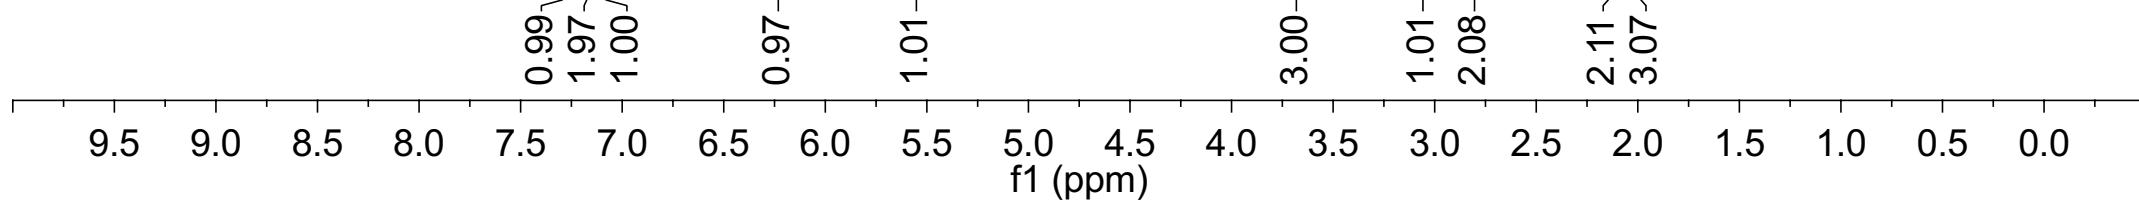

$^{13}\text{C}$  NMR (101 MHz,  $\text{CDCl}_3$ )

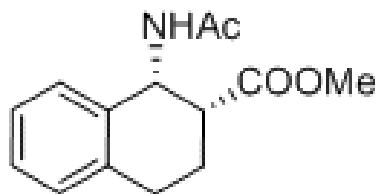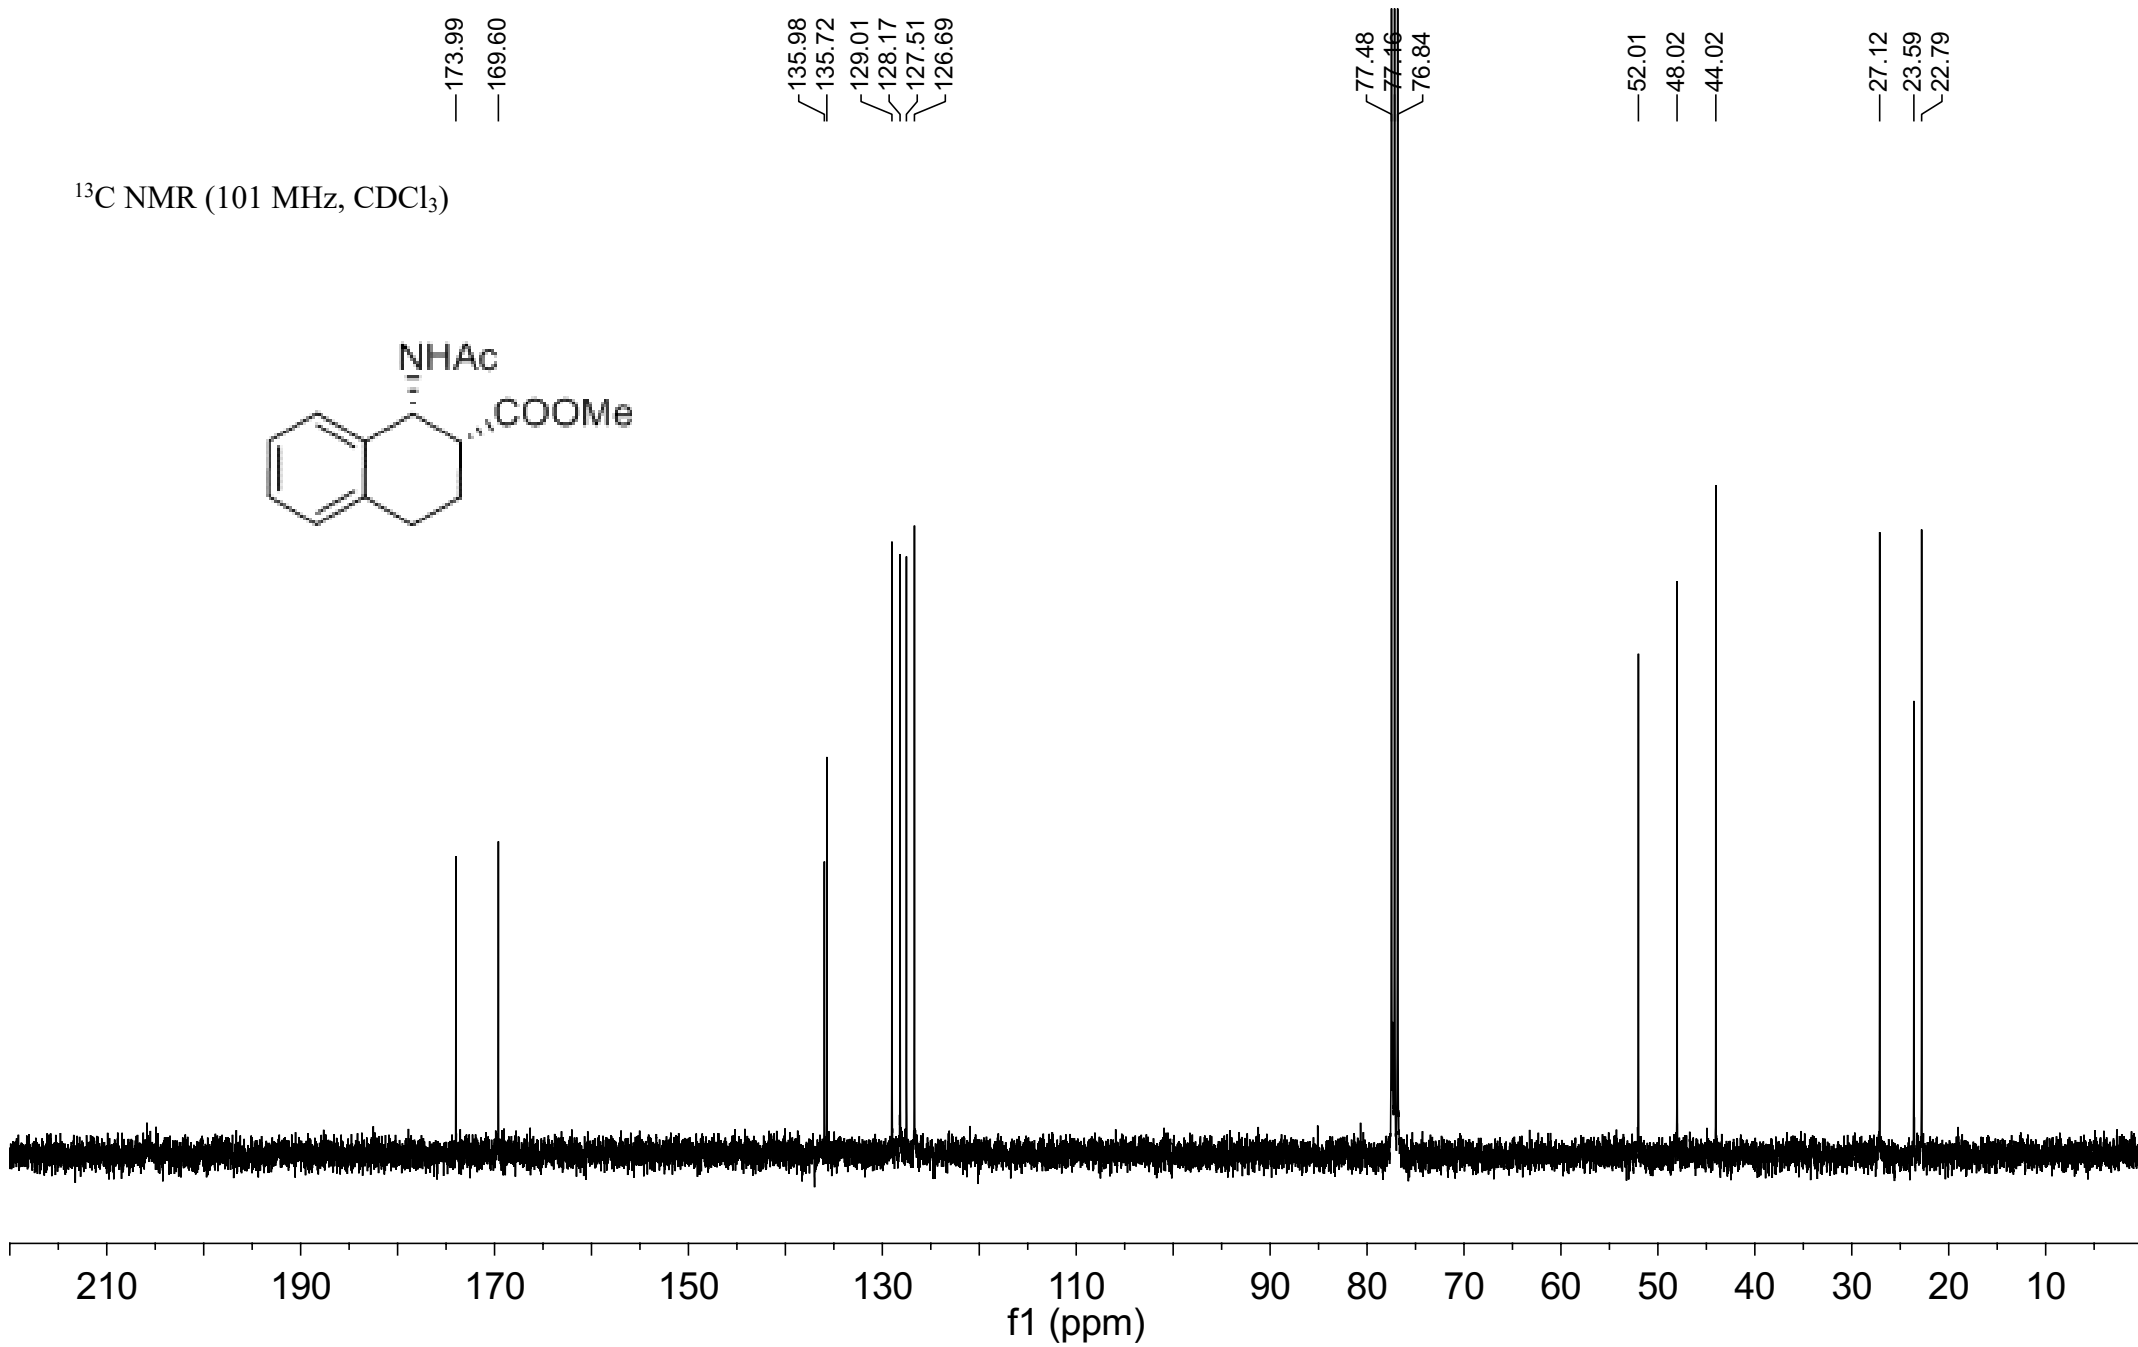

<sup>1</sup>H NMR (400 MHz, CDCl<sub>3</sub>)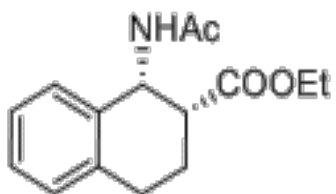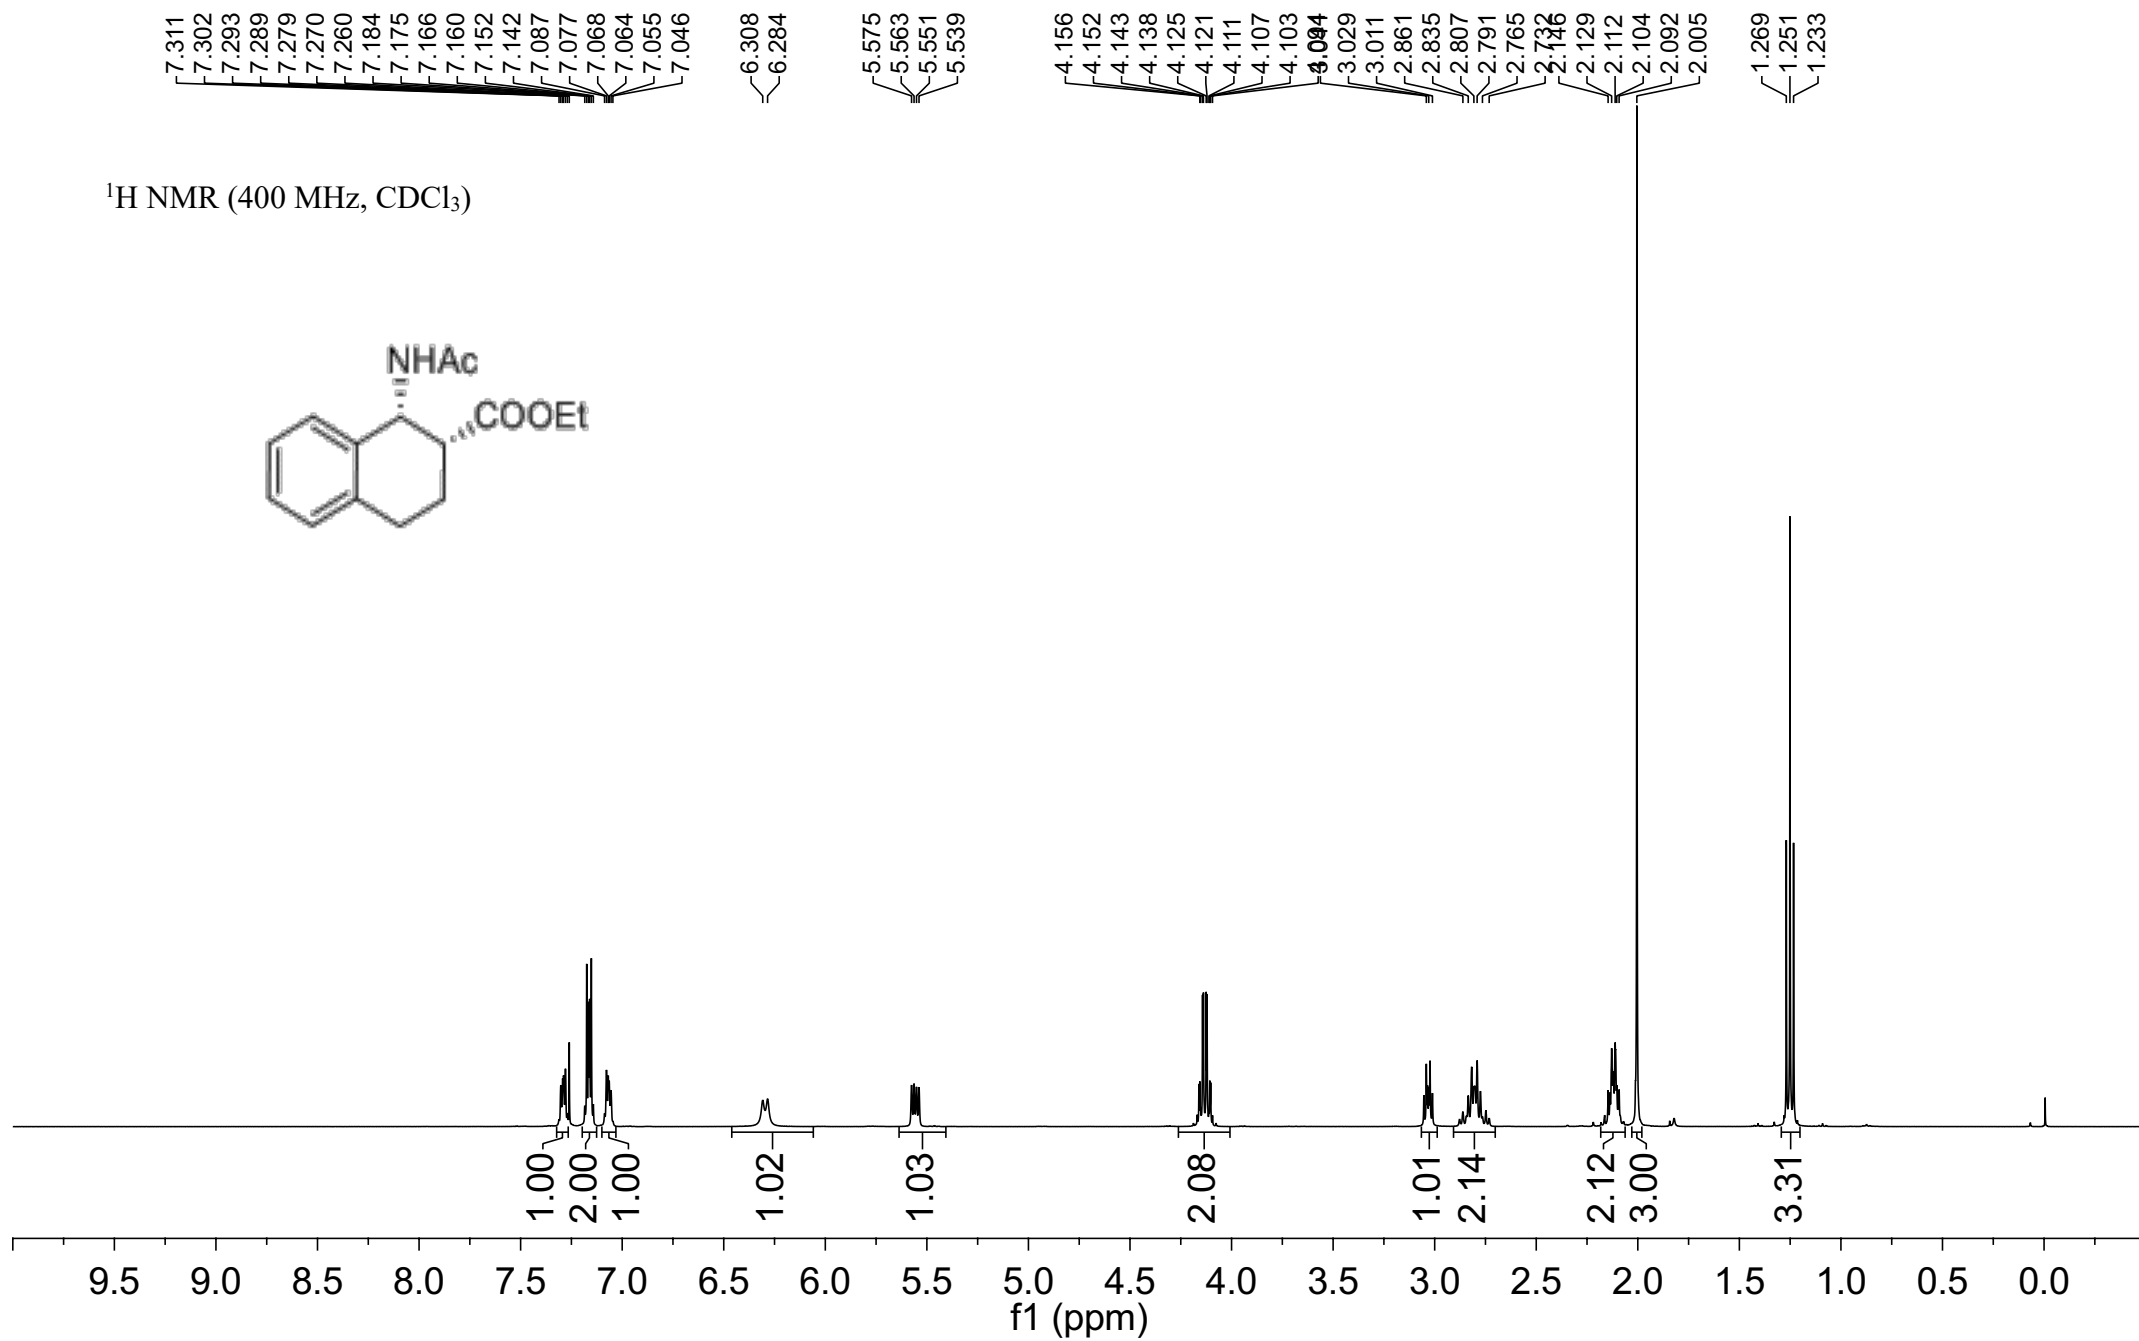

$^{13}\text{C}$  NMR (101 MHz,  $\text{CDCl}_3$ )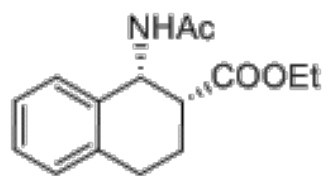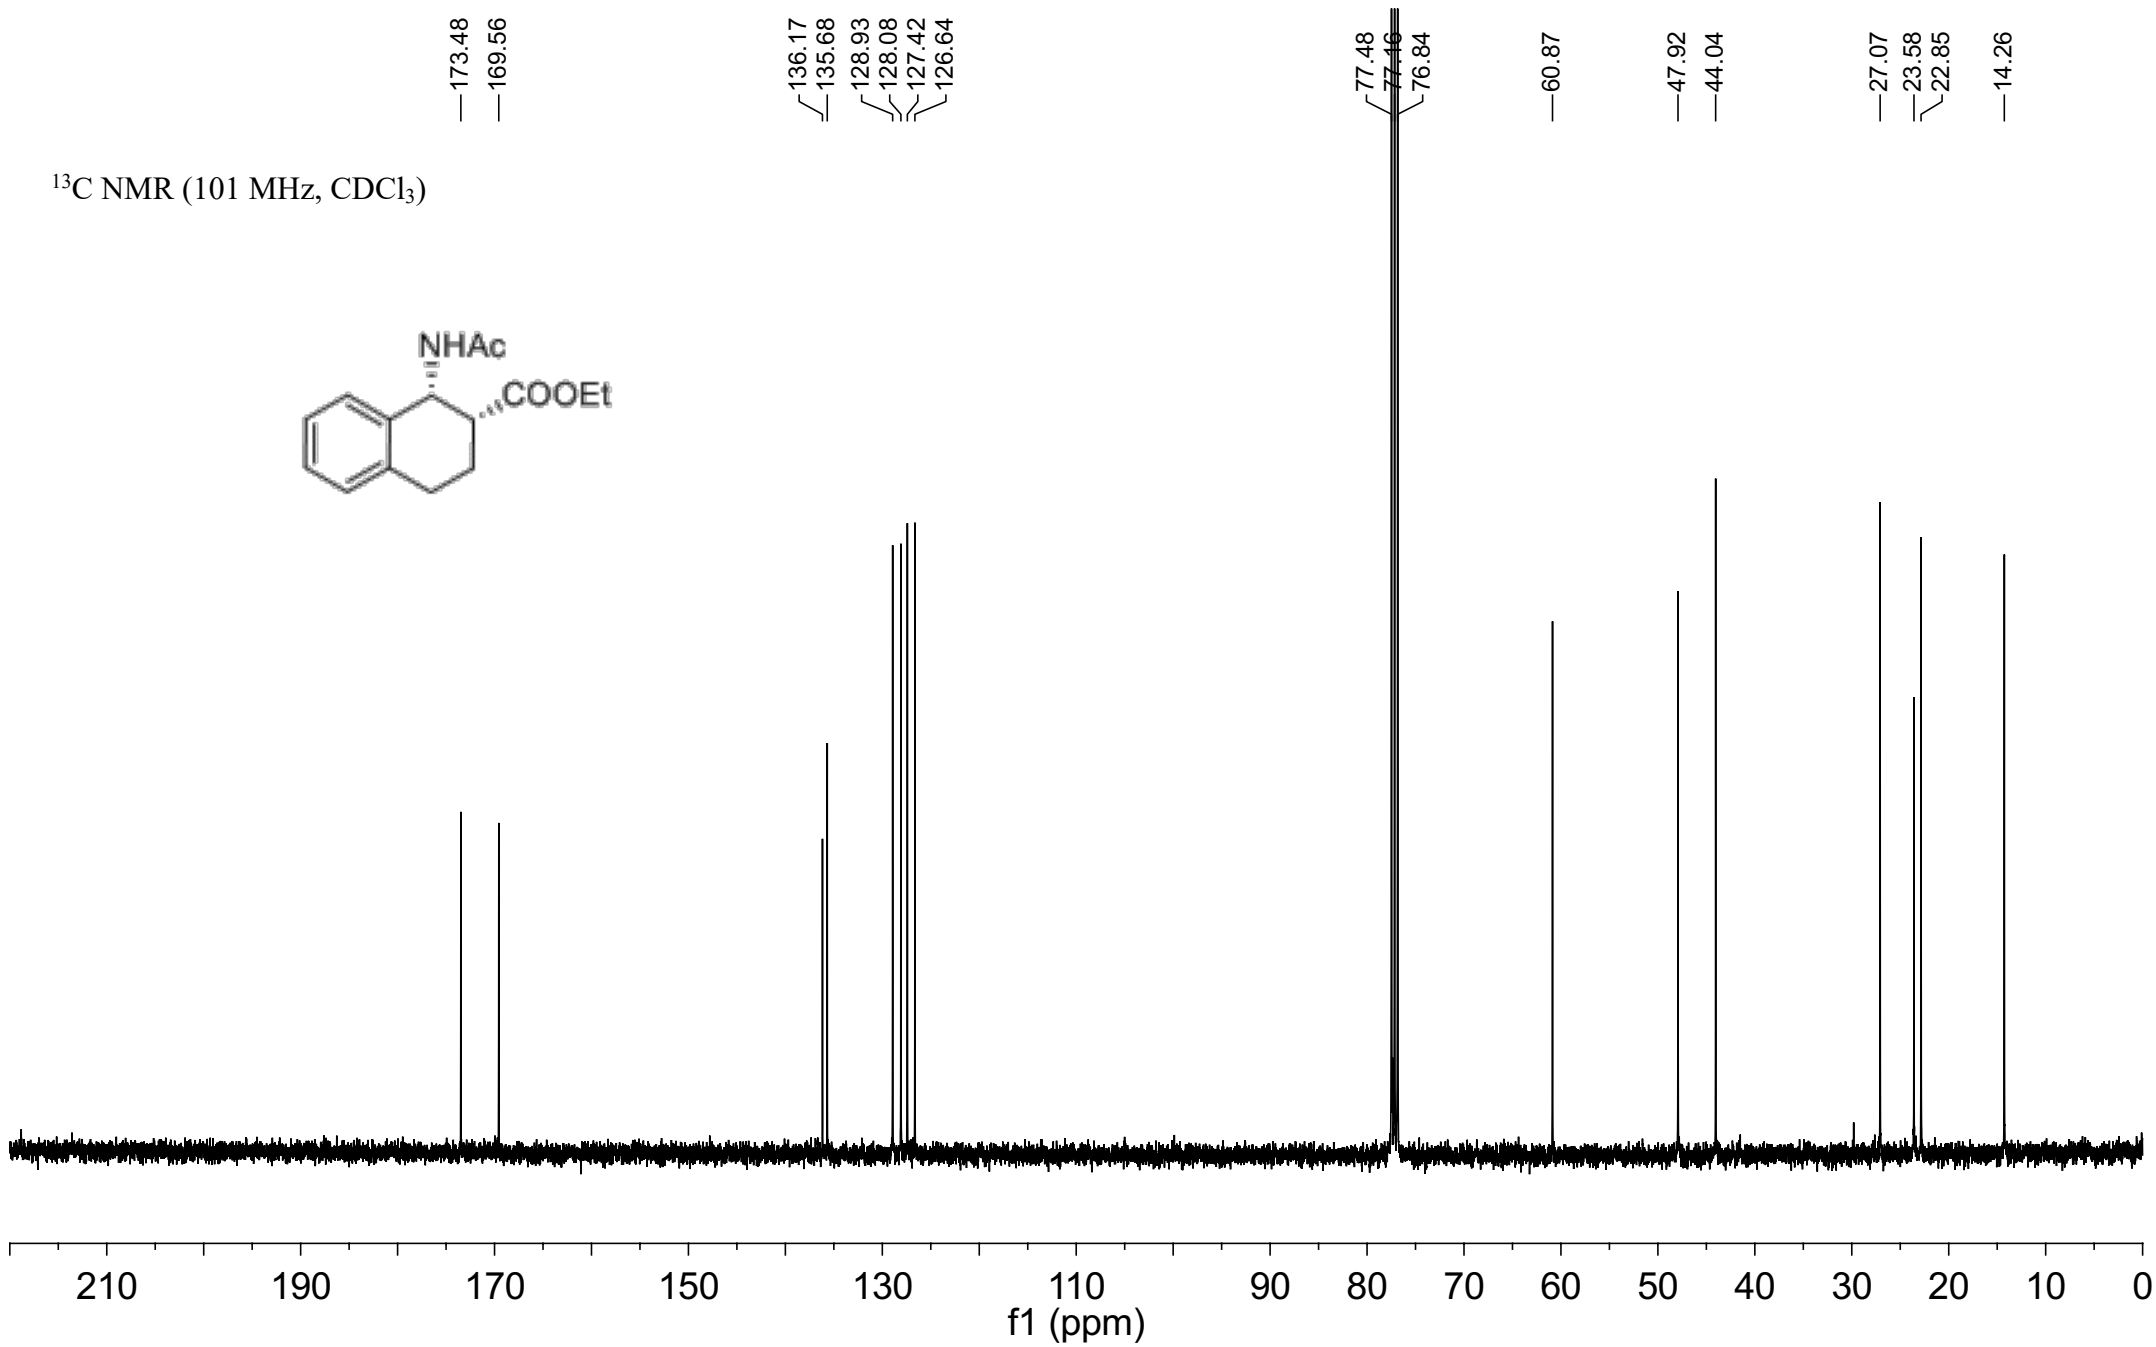

<sup>1</sup>H NMR (400 MHz, CDCl<sub>3</sub>)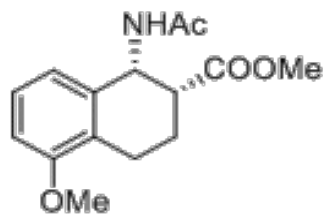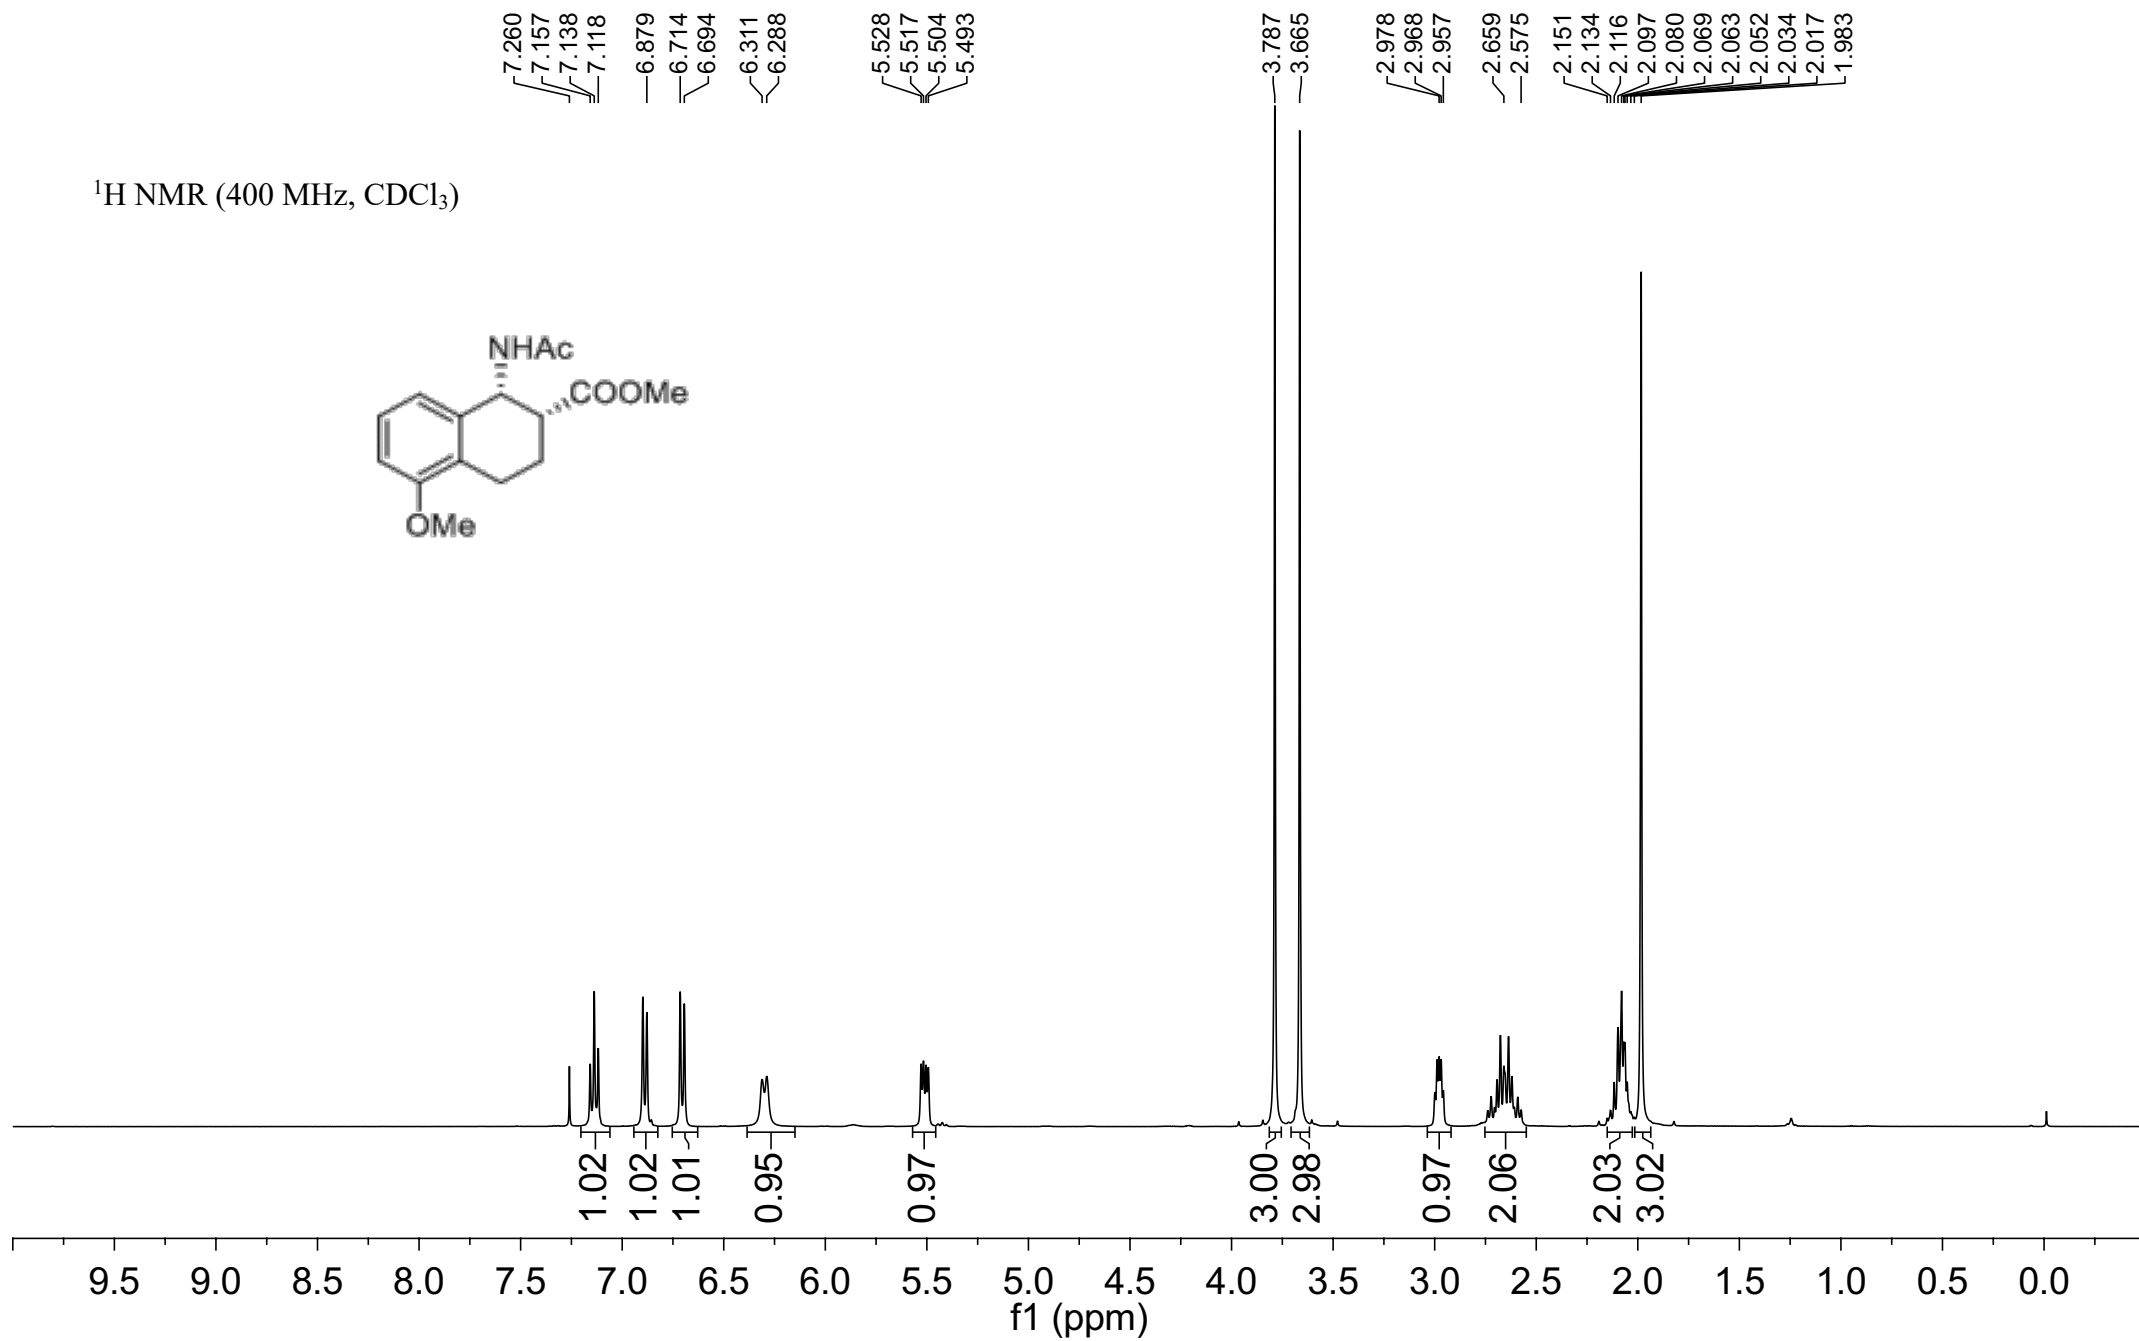

$^{13}\text{C}$  NMR (101 MHz,  $\text{CDCl}_3$ )

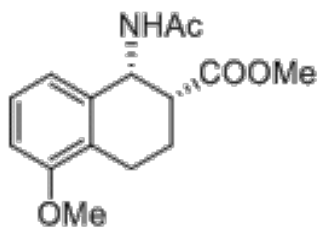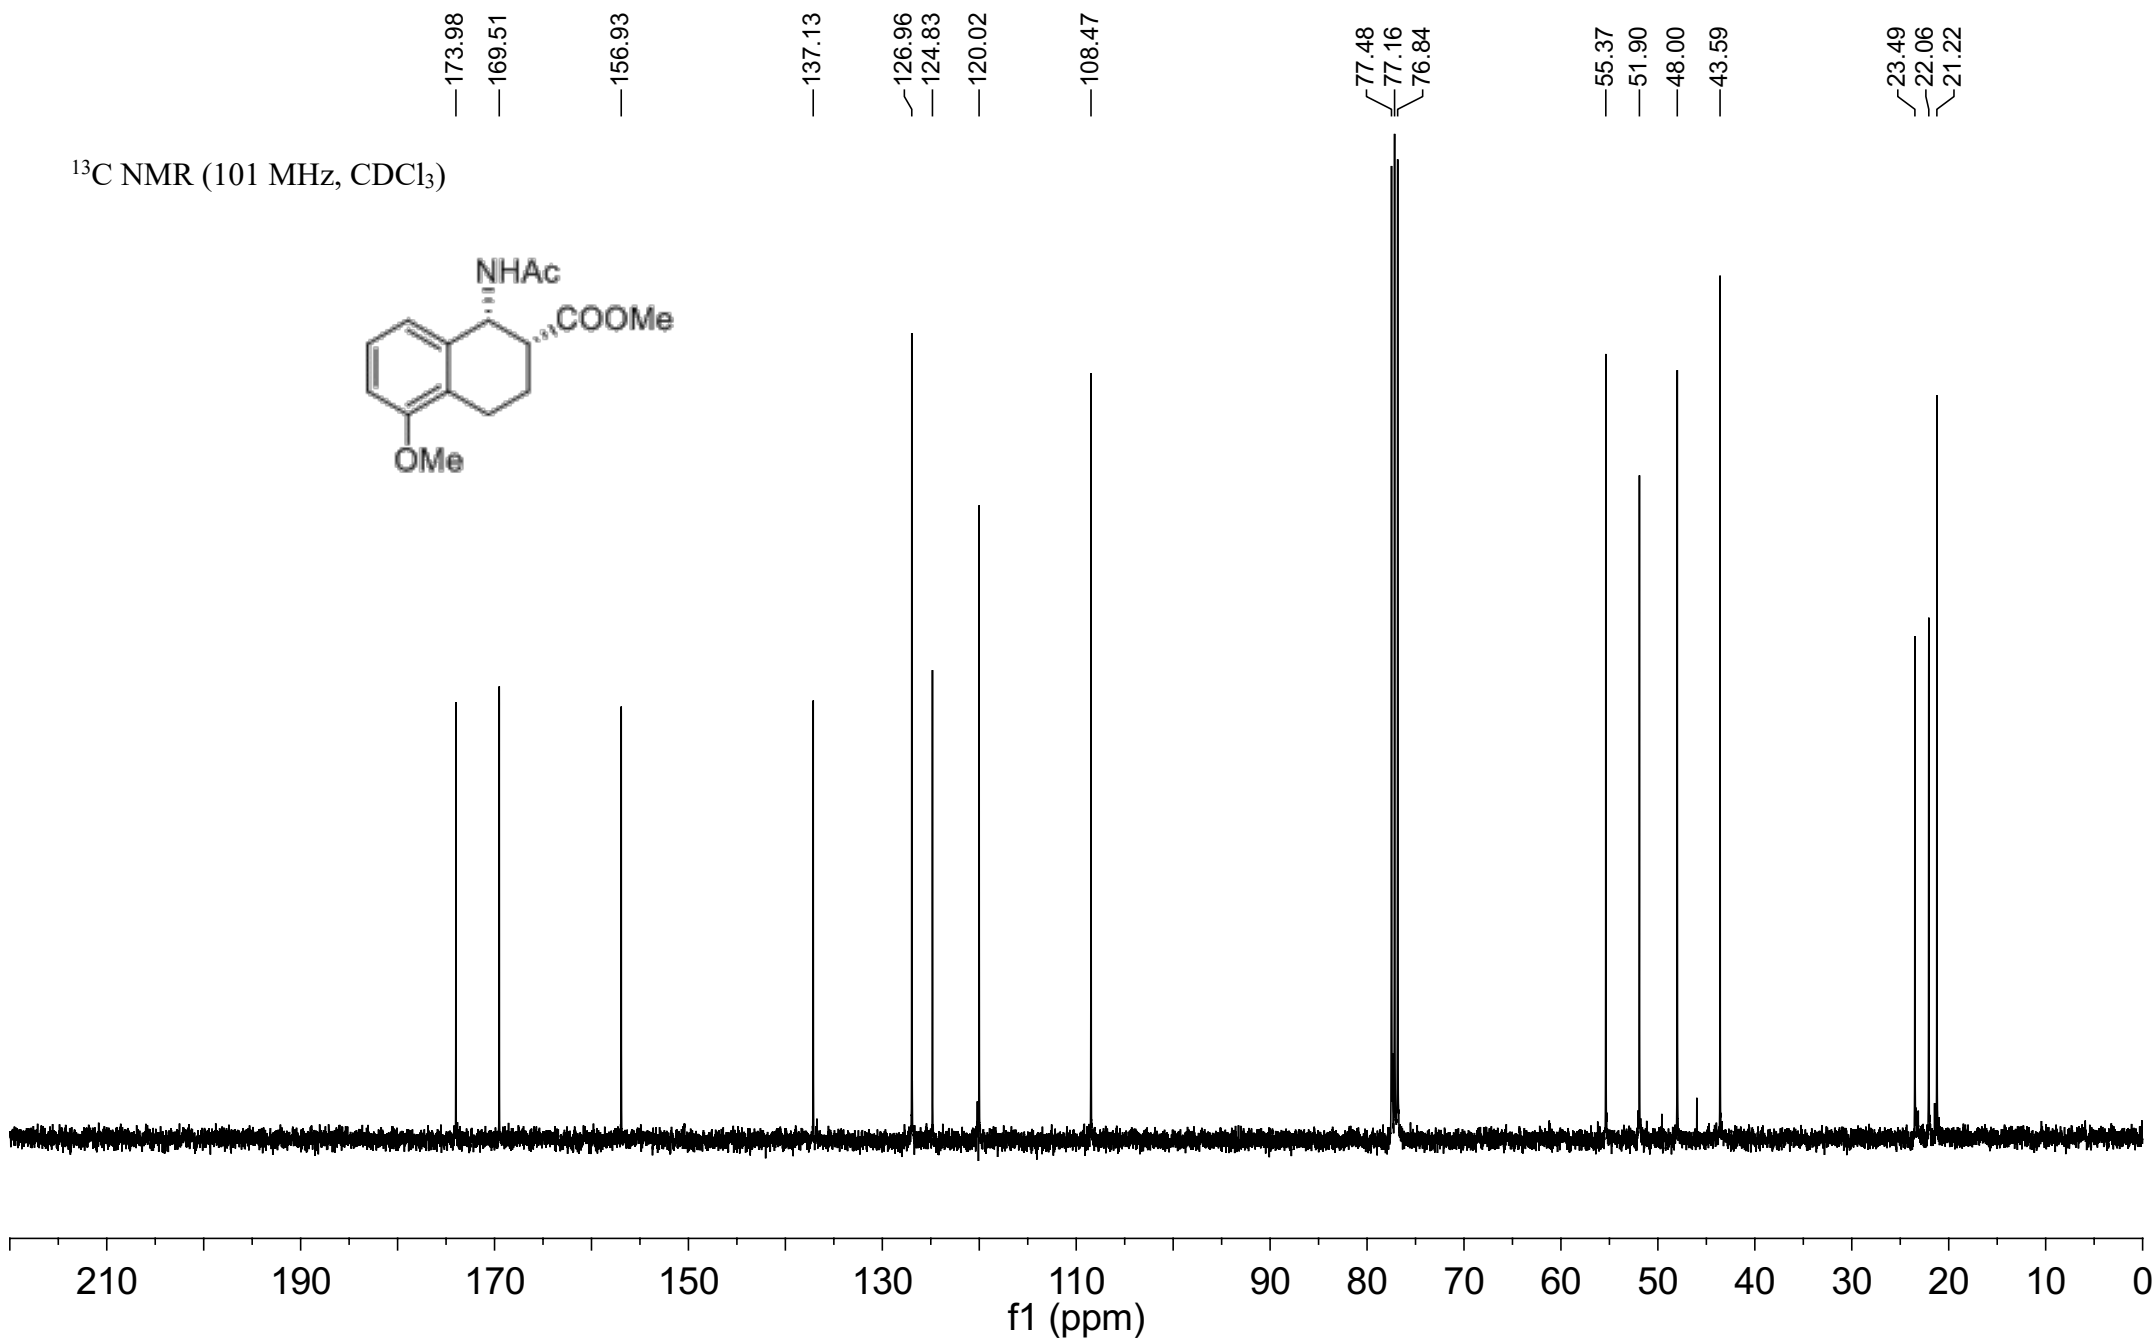



$^1\text{H}$  NMR (400 MHz,  $\text{CDCl}_3$ )

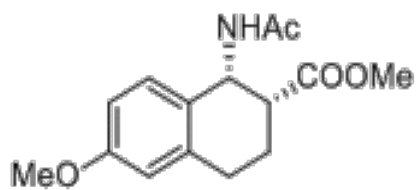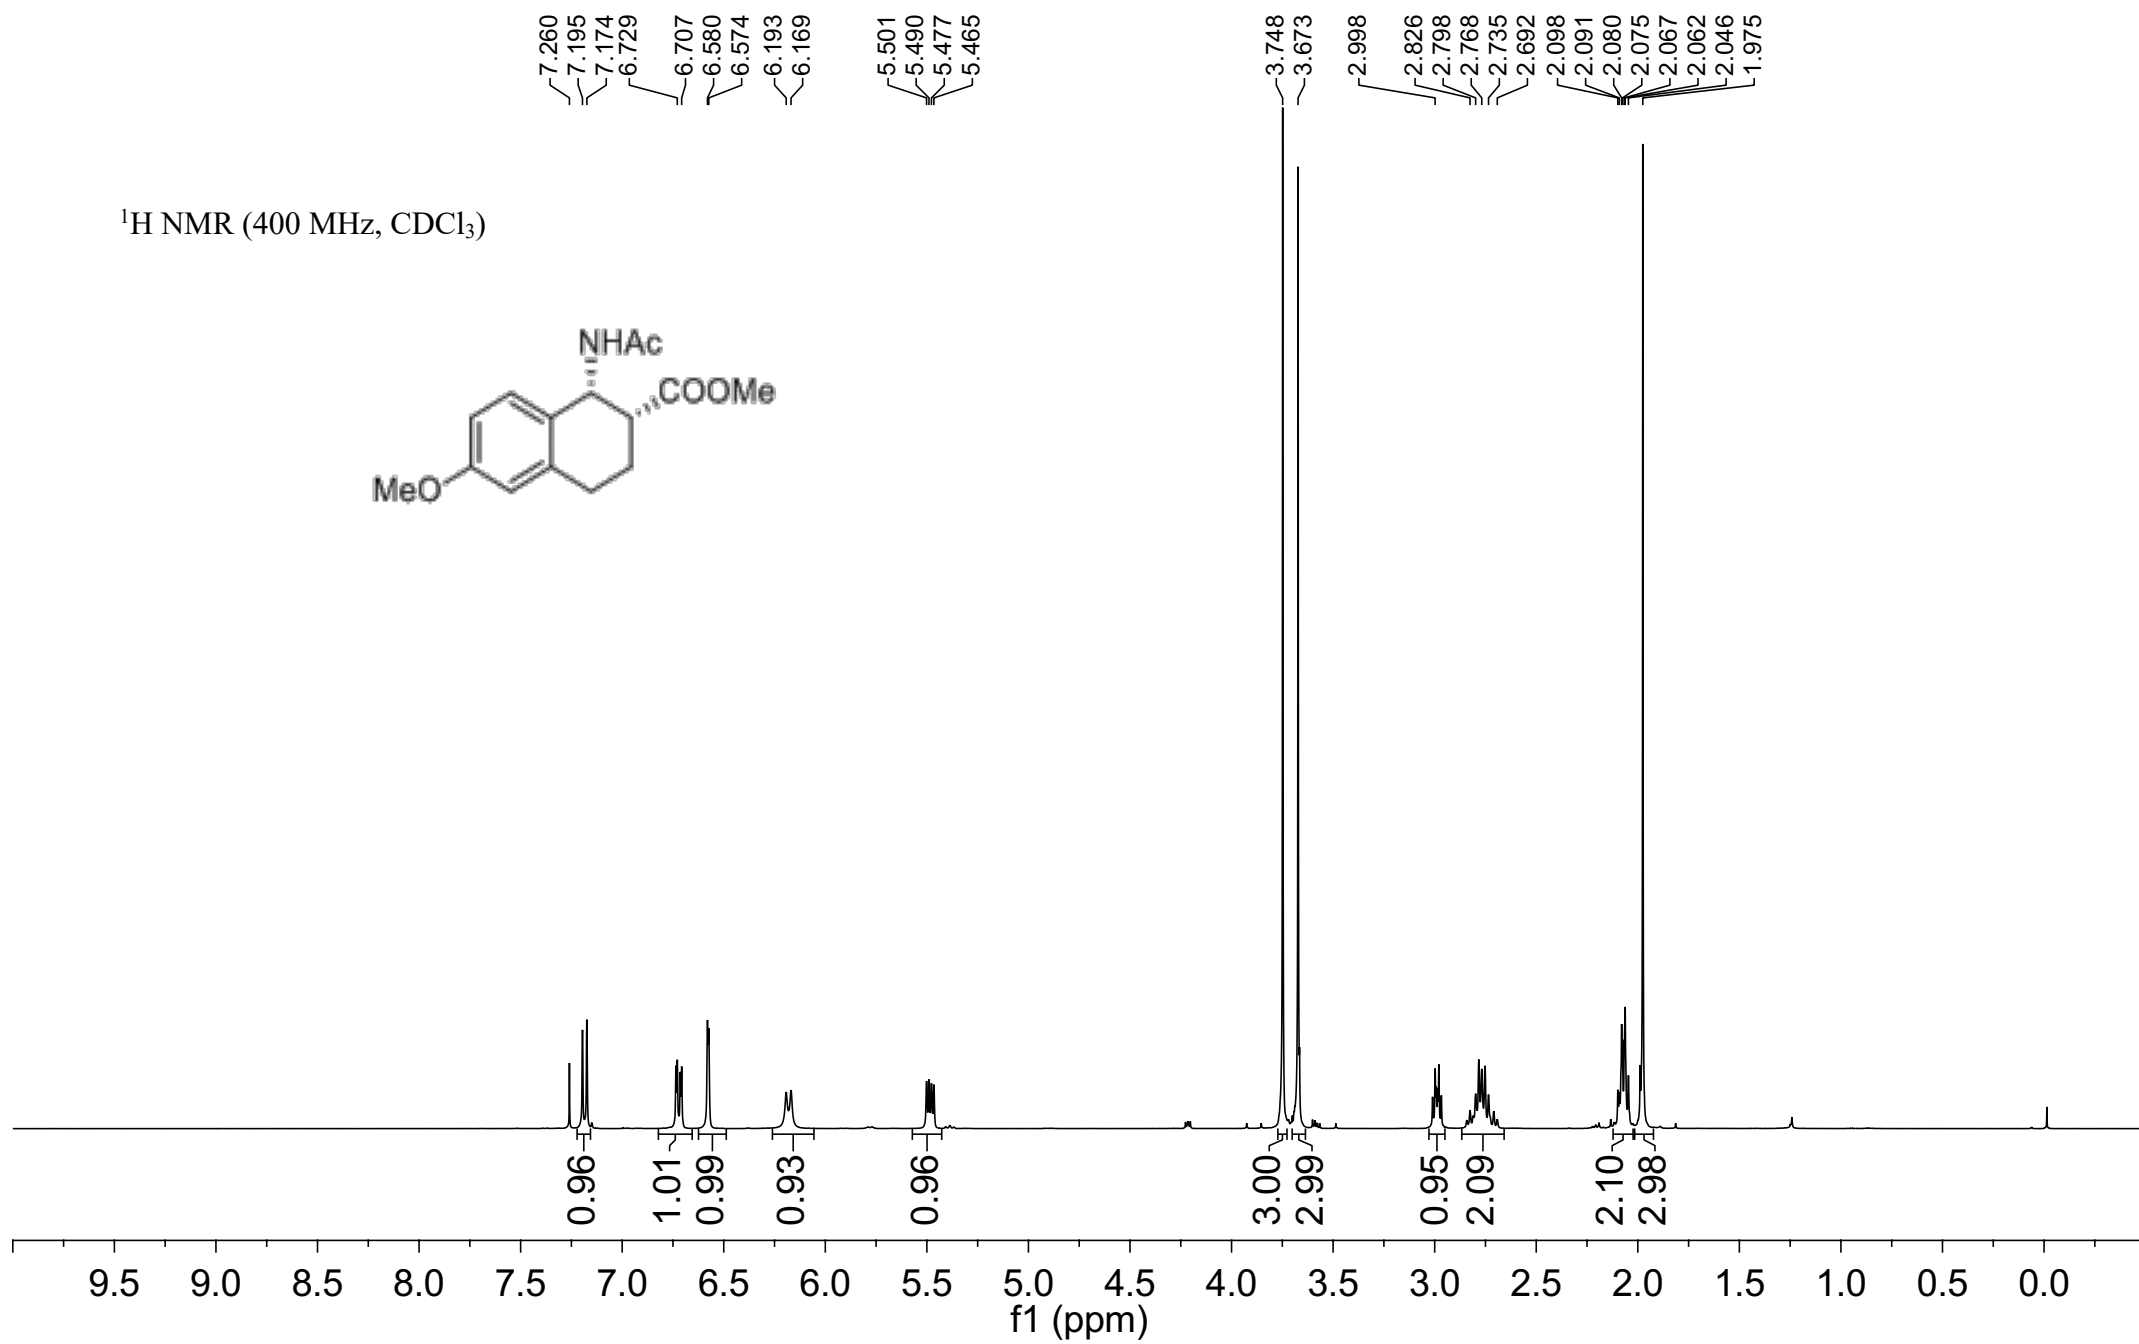

$^{13}\text{C}$  NMR (101 MHz,  $\text{CDCl}_3$ )

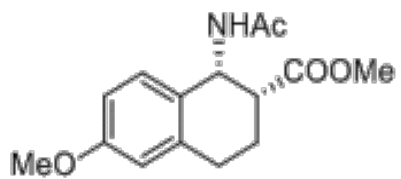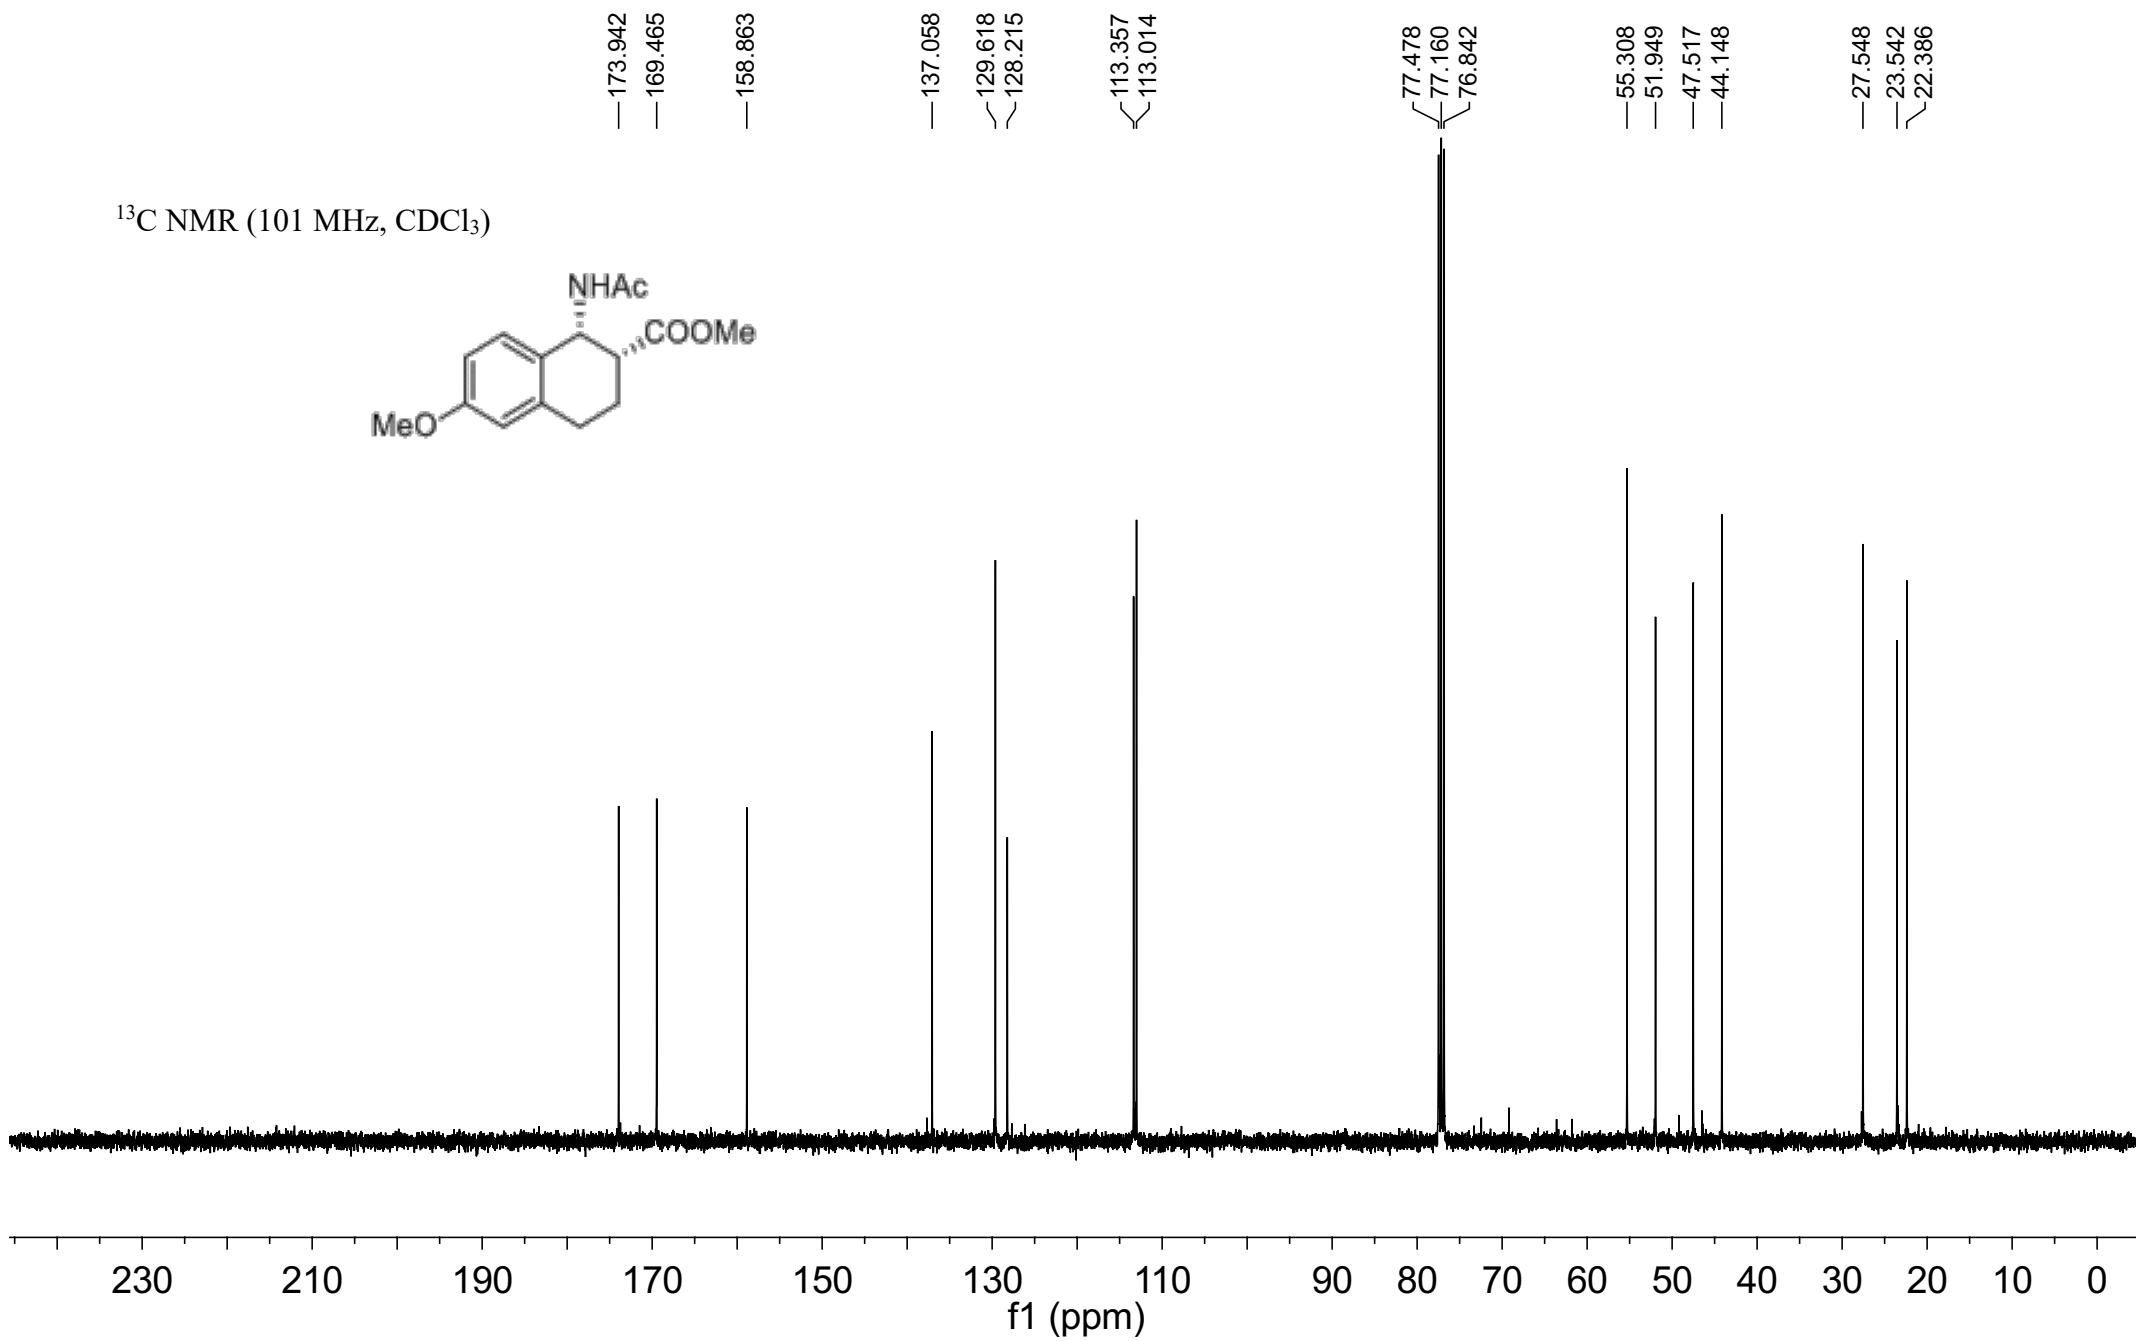

<sup>1</sup>H NMR (400 MHz, CDCl<sub>3</sub>)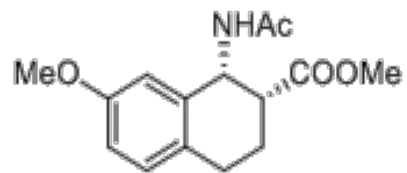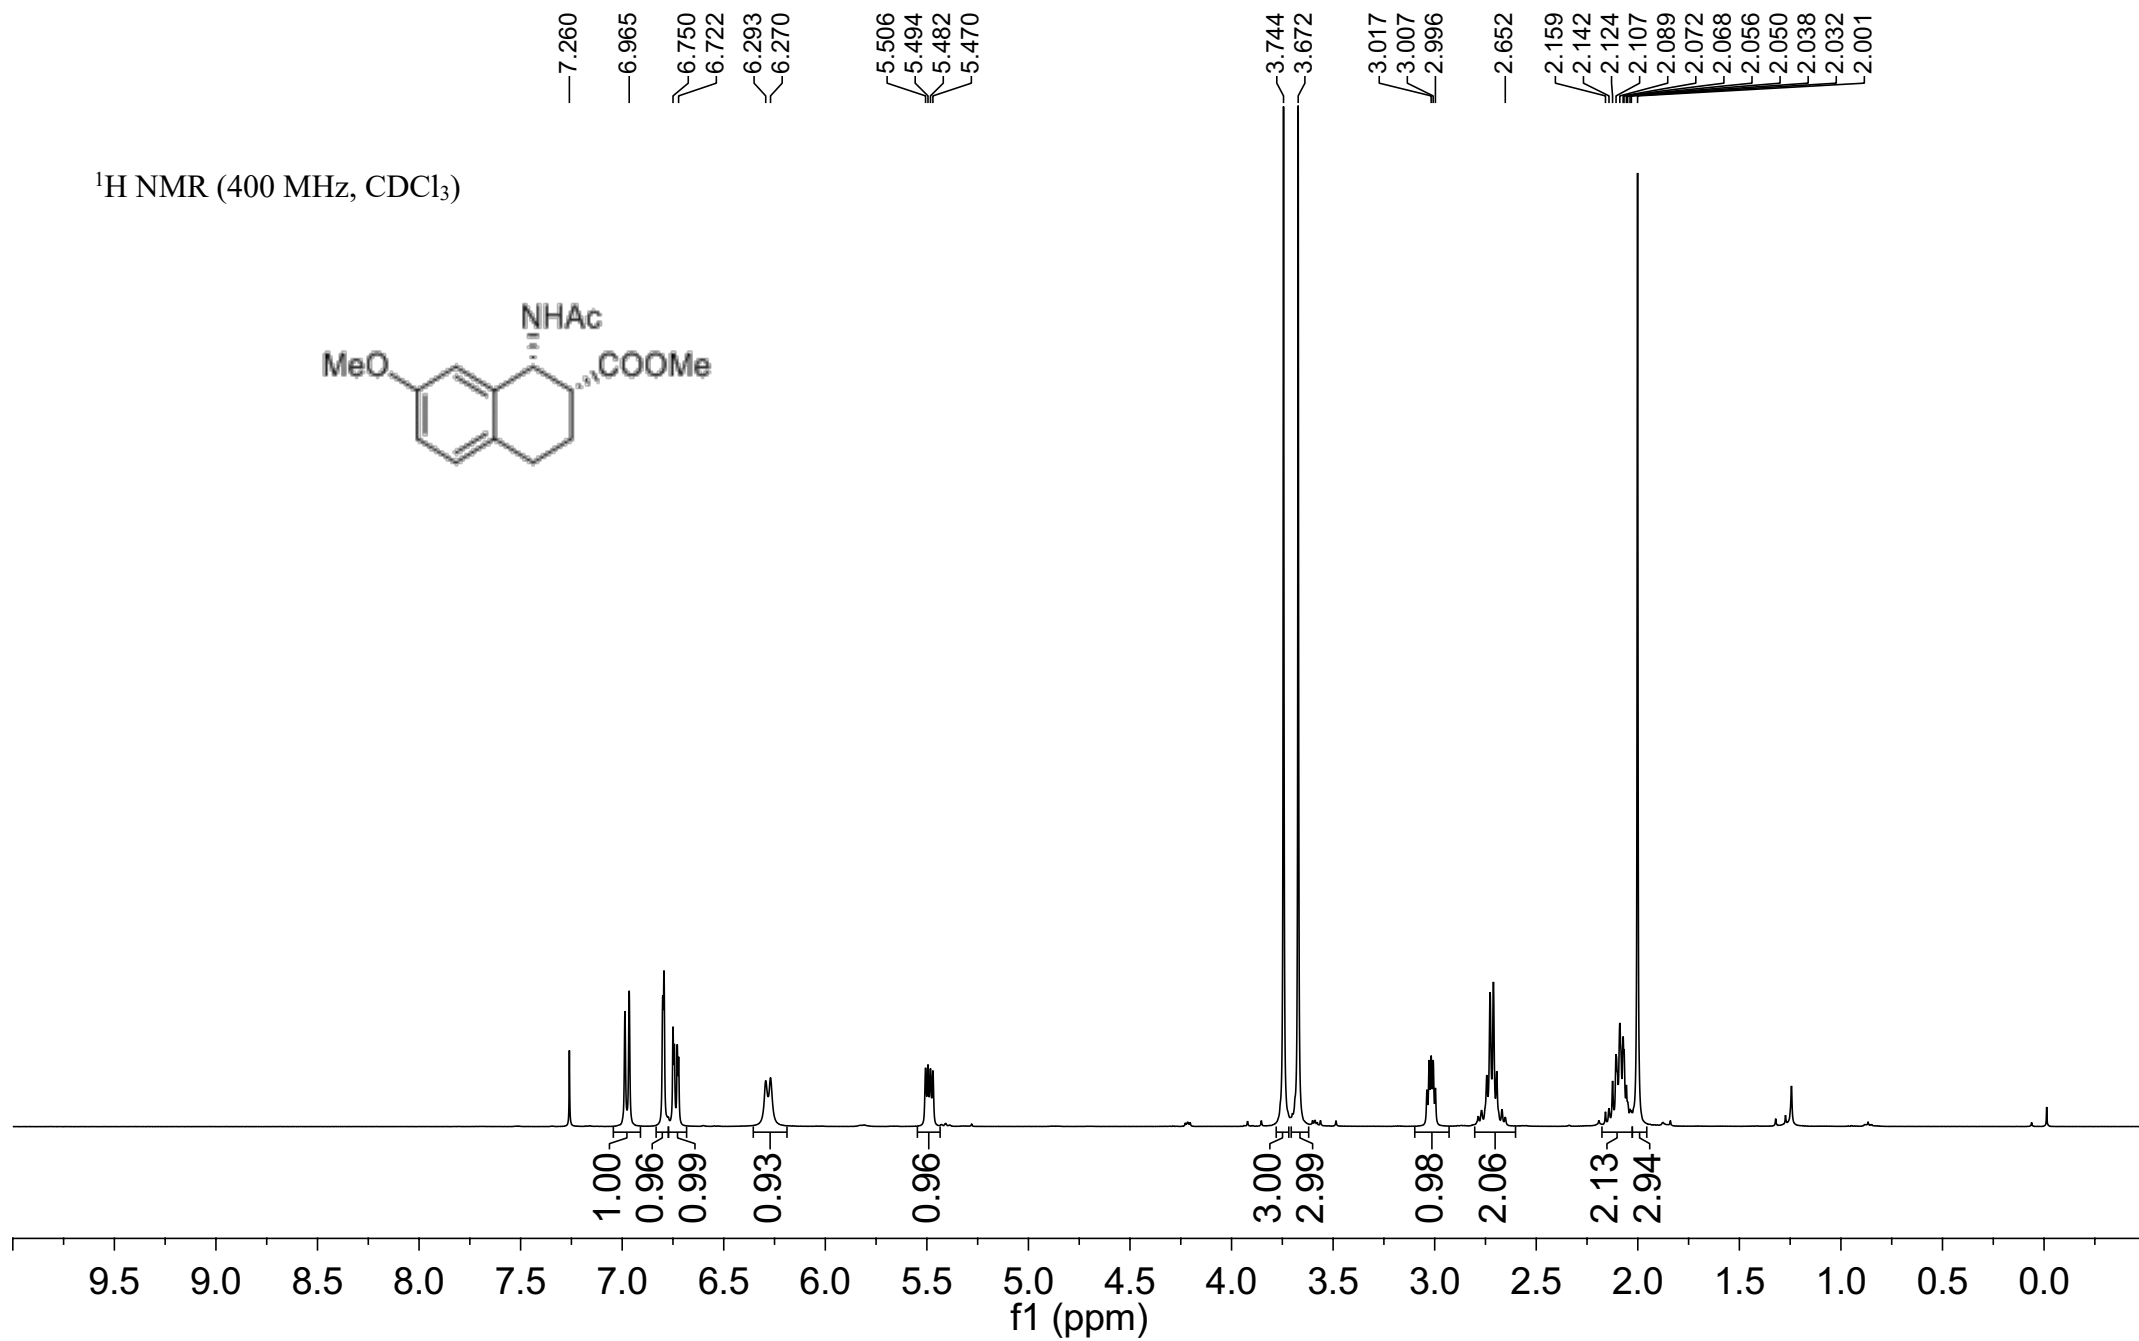

$^{13}\text{C}$  NMR (101 MHz,  $\text{CDCl}_3$ )

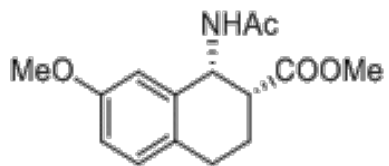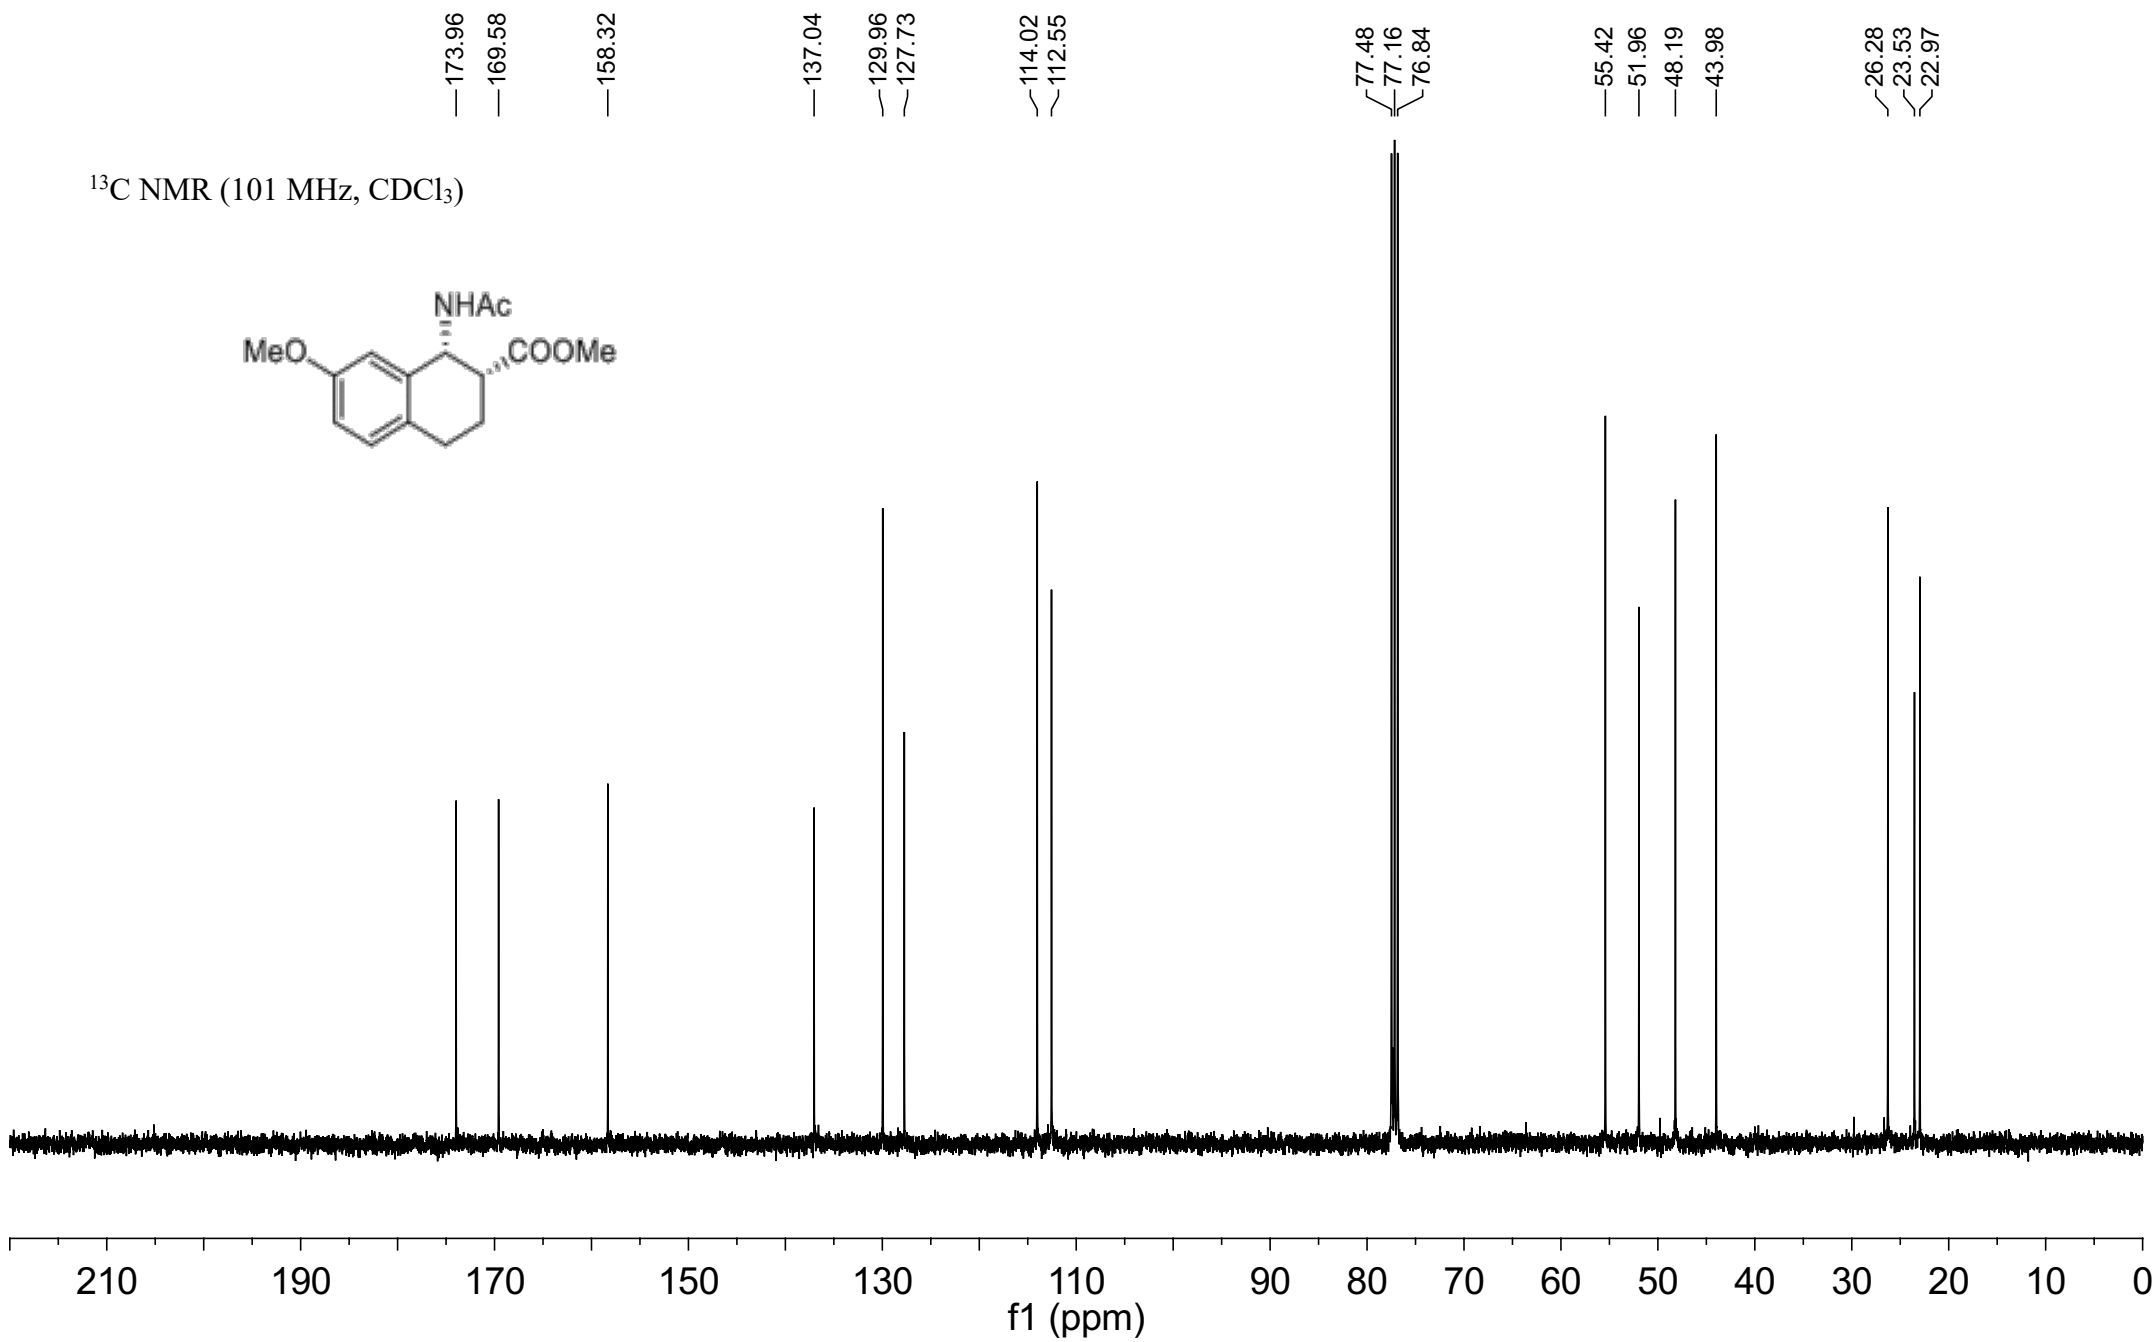

7.260  
6.966  
6.899  
6.155  
6.123  
5.545  
5.530  
5.513  
5.498  
3.690  
2.995  
2.977  
2.957  
2.638  
2.511  
2.261  
2.176  
2.152  
2.130  
2.109  
2.089  
2.085  
2.012

$^1\text{H}$  NMR (400 MHz,  $\text{CDCl}_3$ )

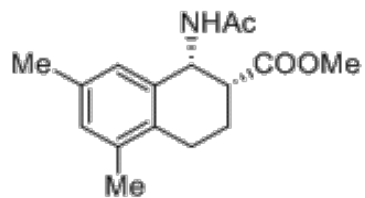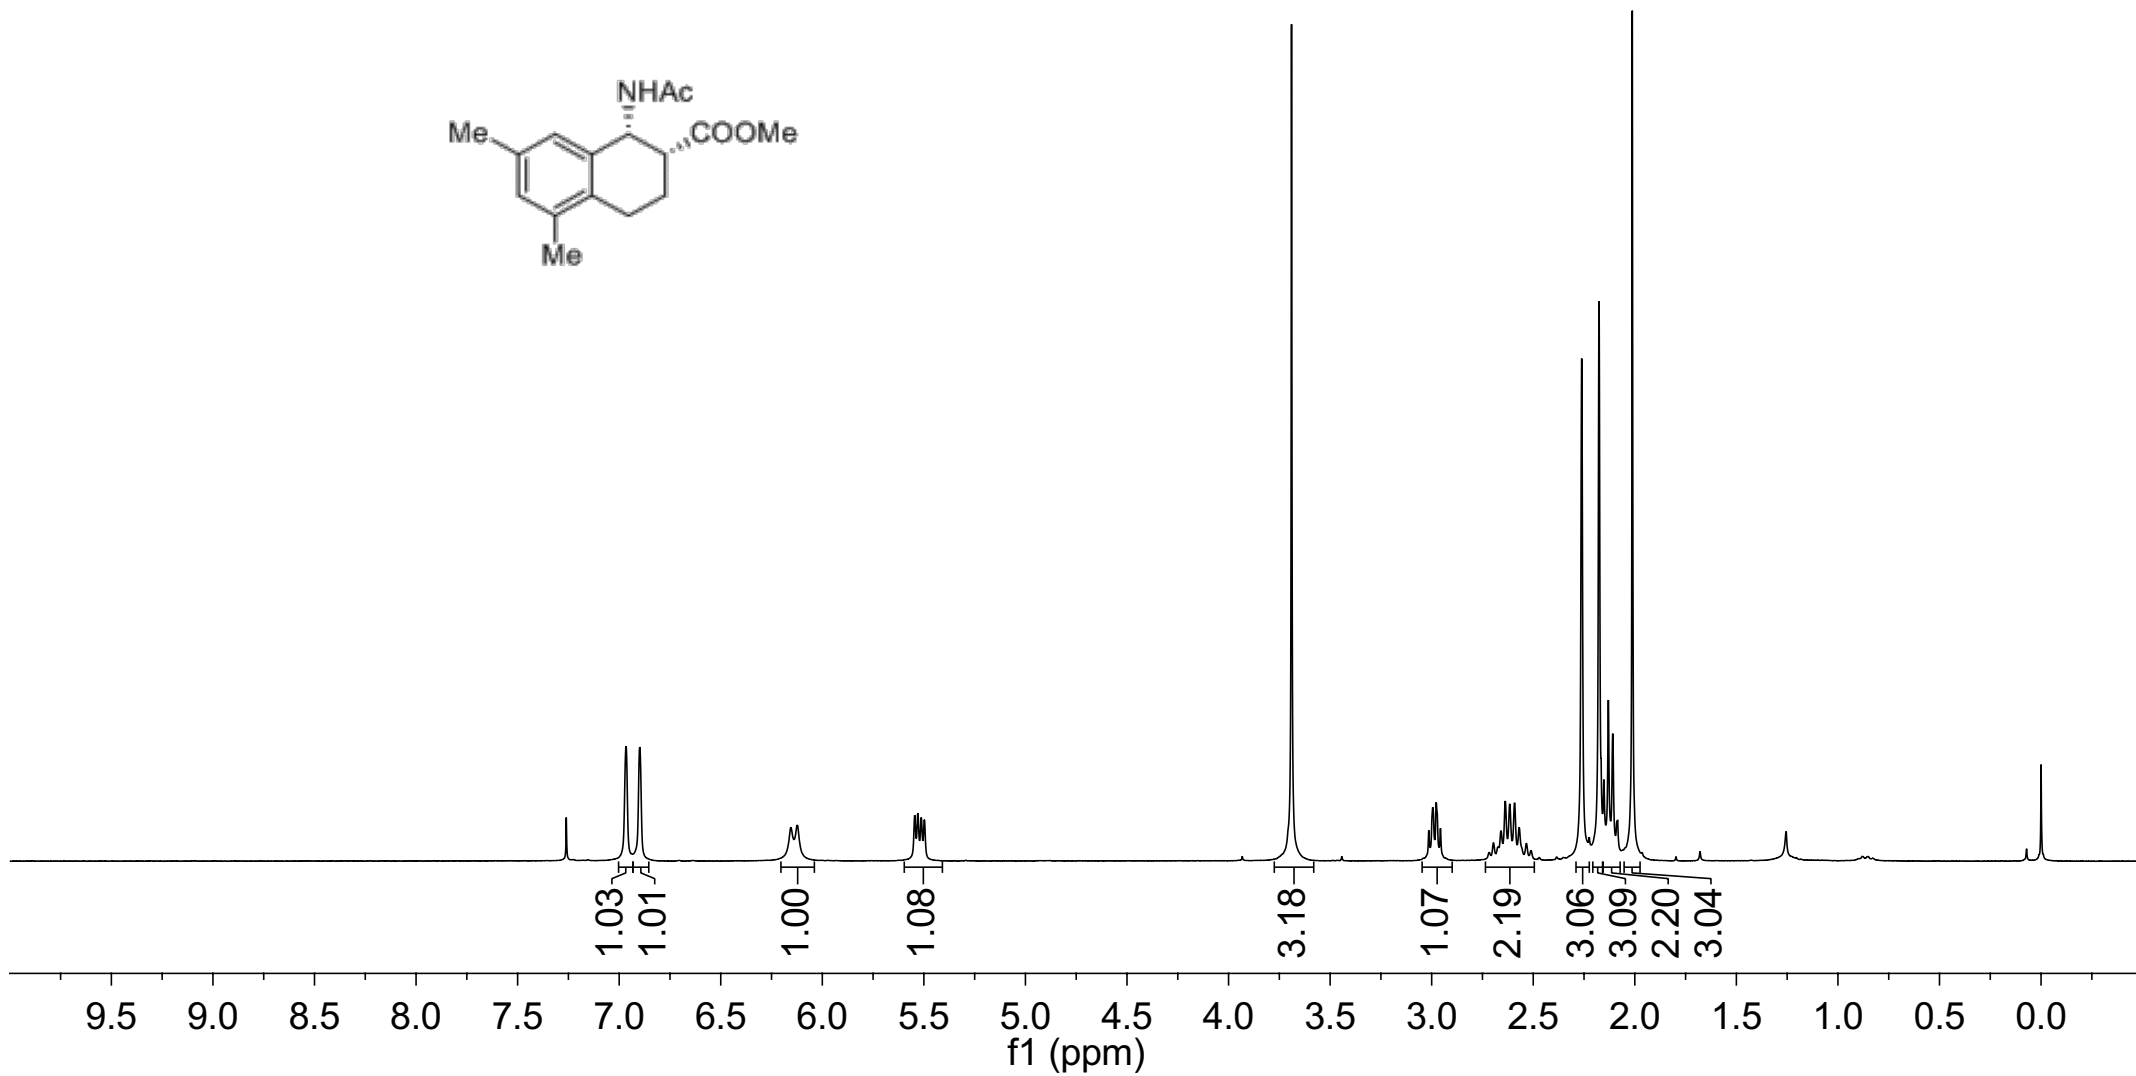

$^{13}\text{C}$  NMR (101 MHz,  $\text{CDCl}_3$ )

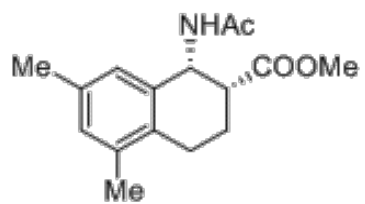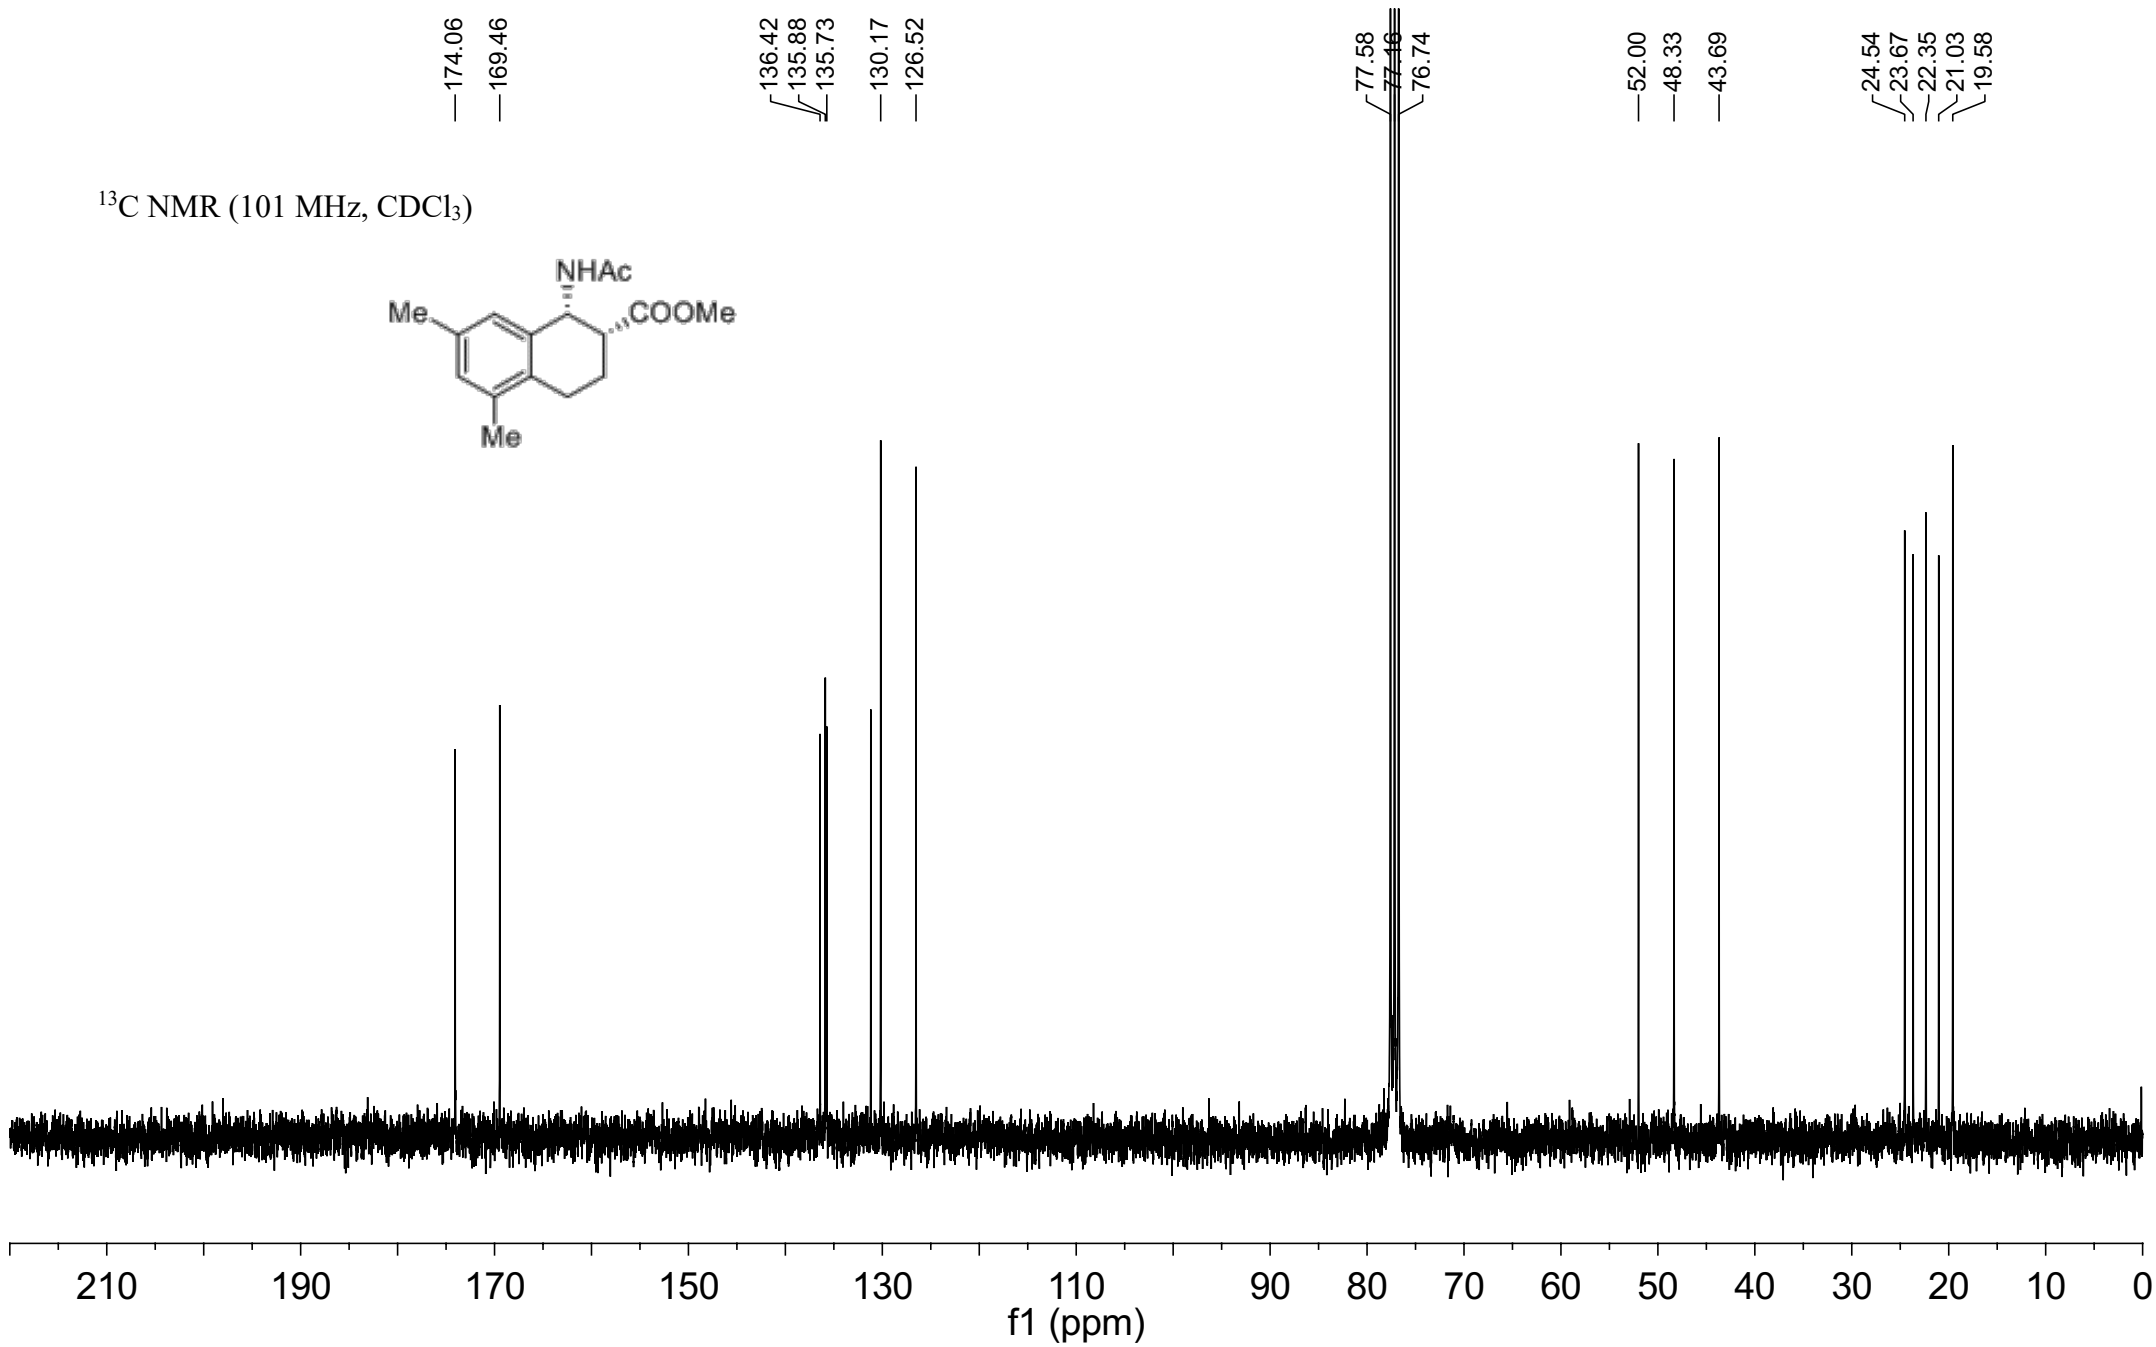

$^1\text{H}$  NMR (400 MHz,  $\text{CDCl}_3$ )

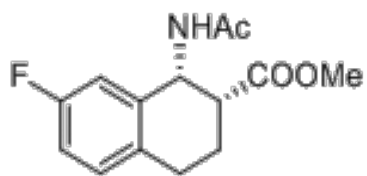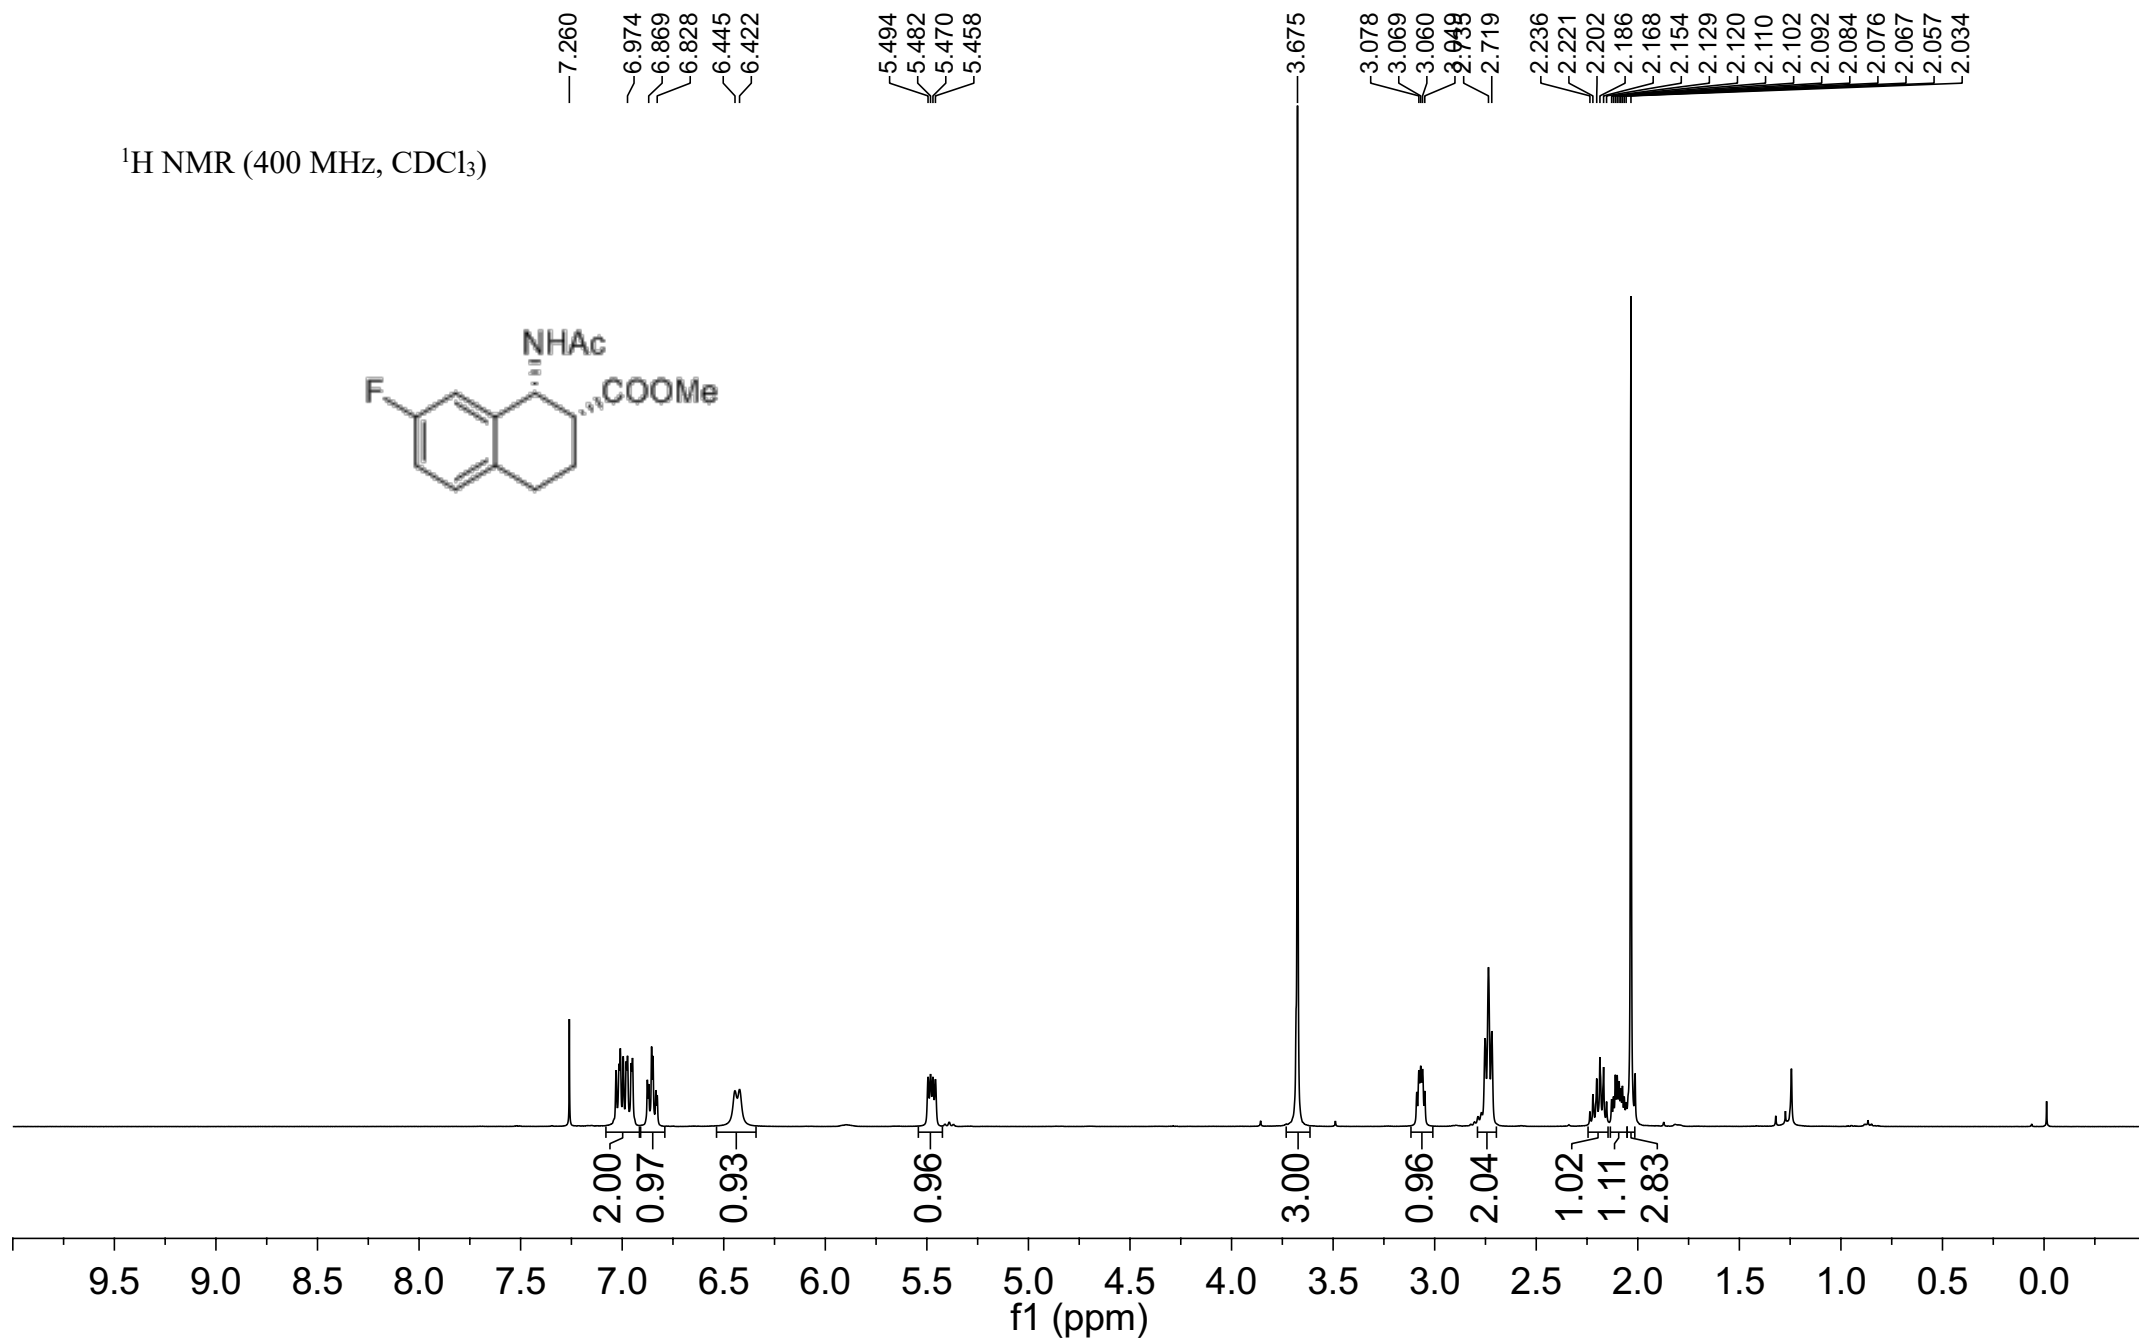

—173.86  
—169.81  
—162.80  
—160.37

—138.12  
—138.05  
—131.17  
—131.14  
—130.45  
—130.38

—114.68  
—114.46  
—114.04  
—113.82

—77.48  
—77.46  
—76.84

—52.05  
—48.00  
—43.63

—29.80  
—26.13  
—23.53

$^{13}\text{C}$  NMR (101 MHz,  $\text{CDCl}_3$ )

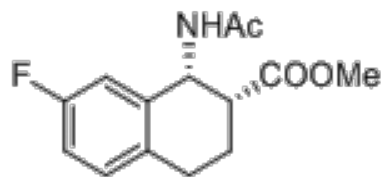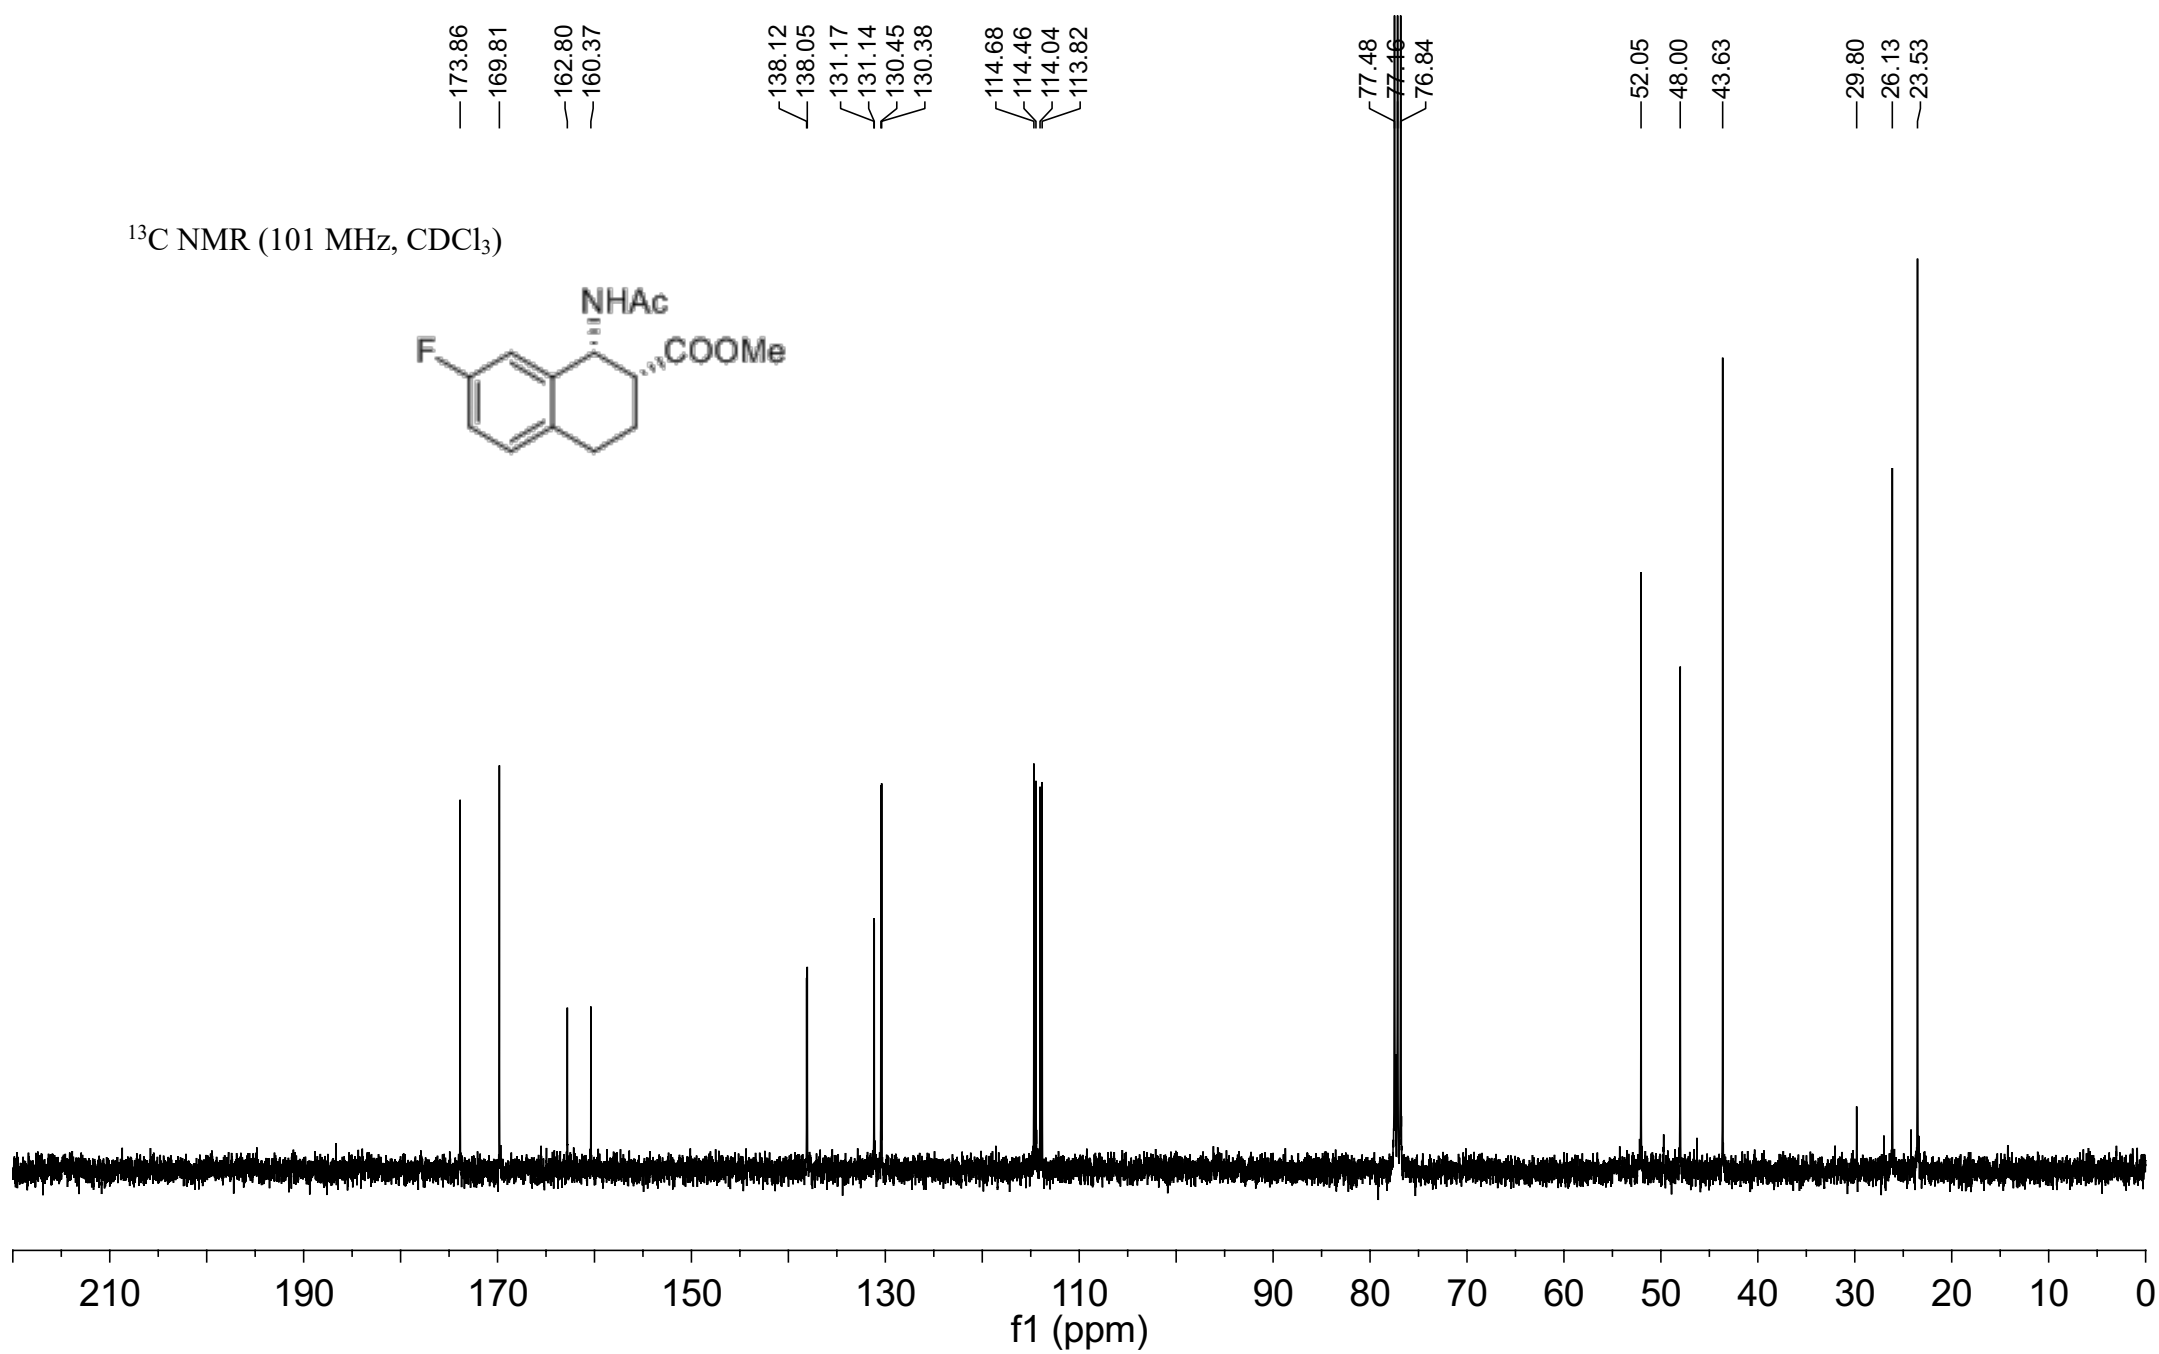



$^{19}\text{F}$  NMR (376.6 MHz,  $\text{CDCl}_3$ )

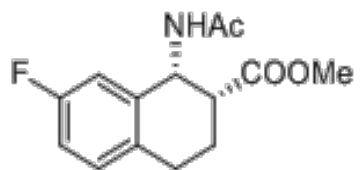

-116.17

10 0 -20 -40 -60 -80 -100 -120 -140 -160 -180 -200  
f1 (ppm)

$^1\text{H}$  NMR (400 MHz,  $\text{CDCl}_3$ )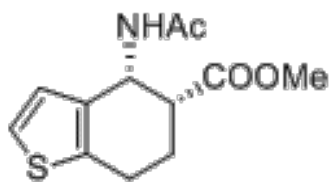

7.260  
7.064  
6.869  
6.851  
6.167  
6.137  
5.510  
5.494  
5.478  
5.462  
3.677  
3.024  
2.983  
2.883  
2.846  
2.805  
2.752  
2.696  
2.626  
2.129  
2.107  
1.959

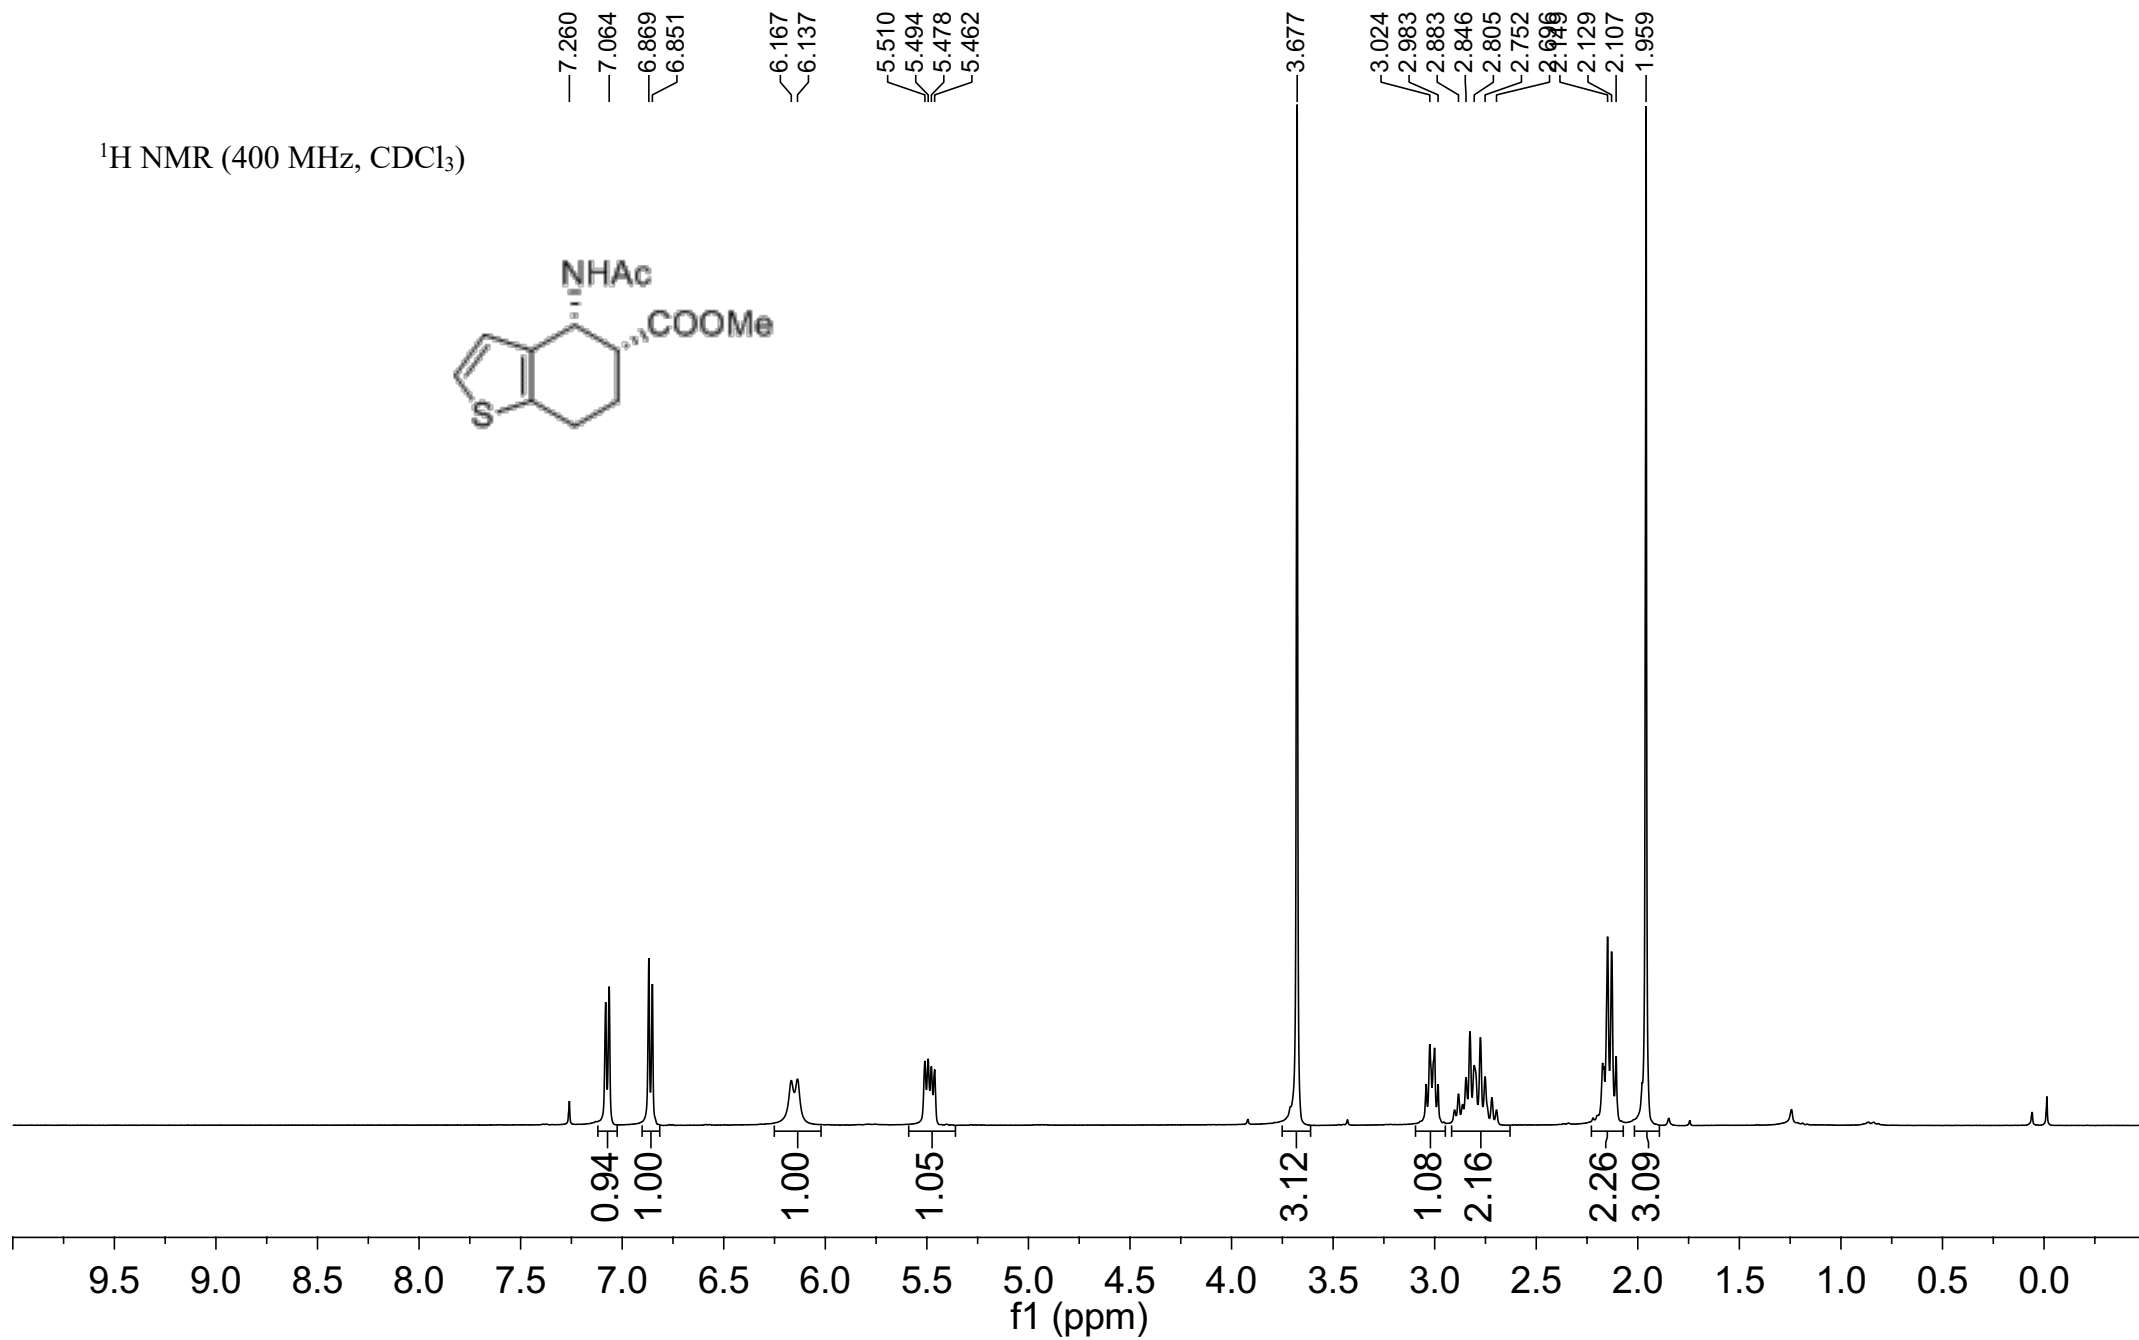

$^{13}\text{C}$  NMR (101 MHz,  $\text{CDCl}_3$ )

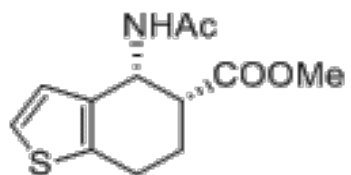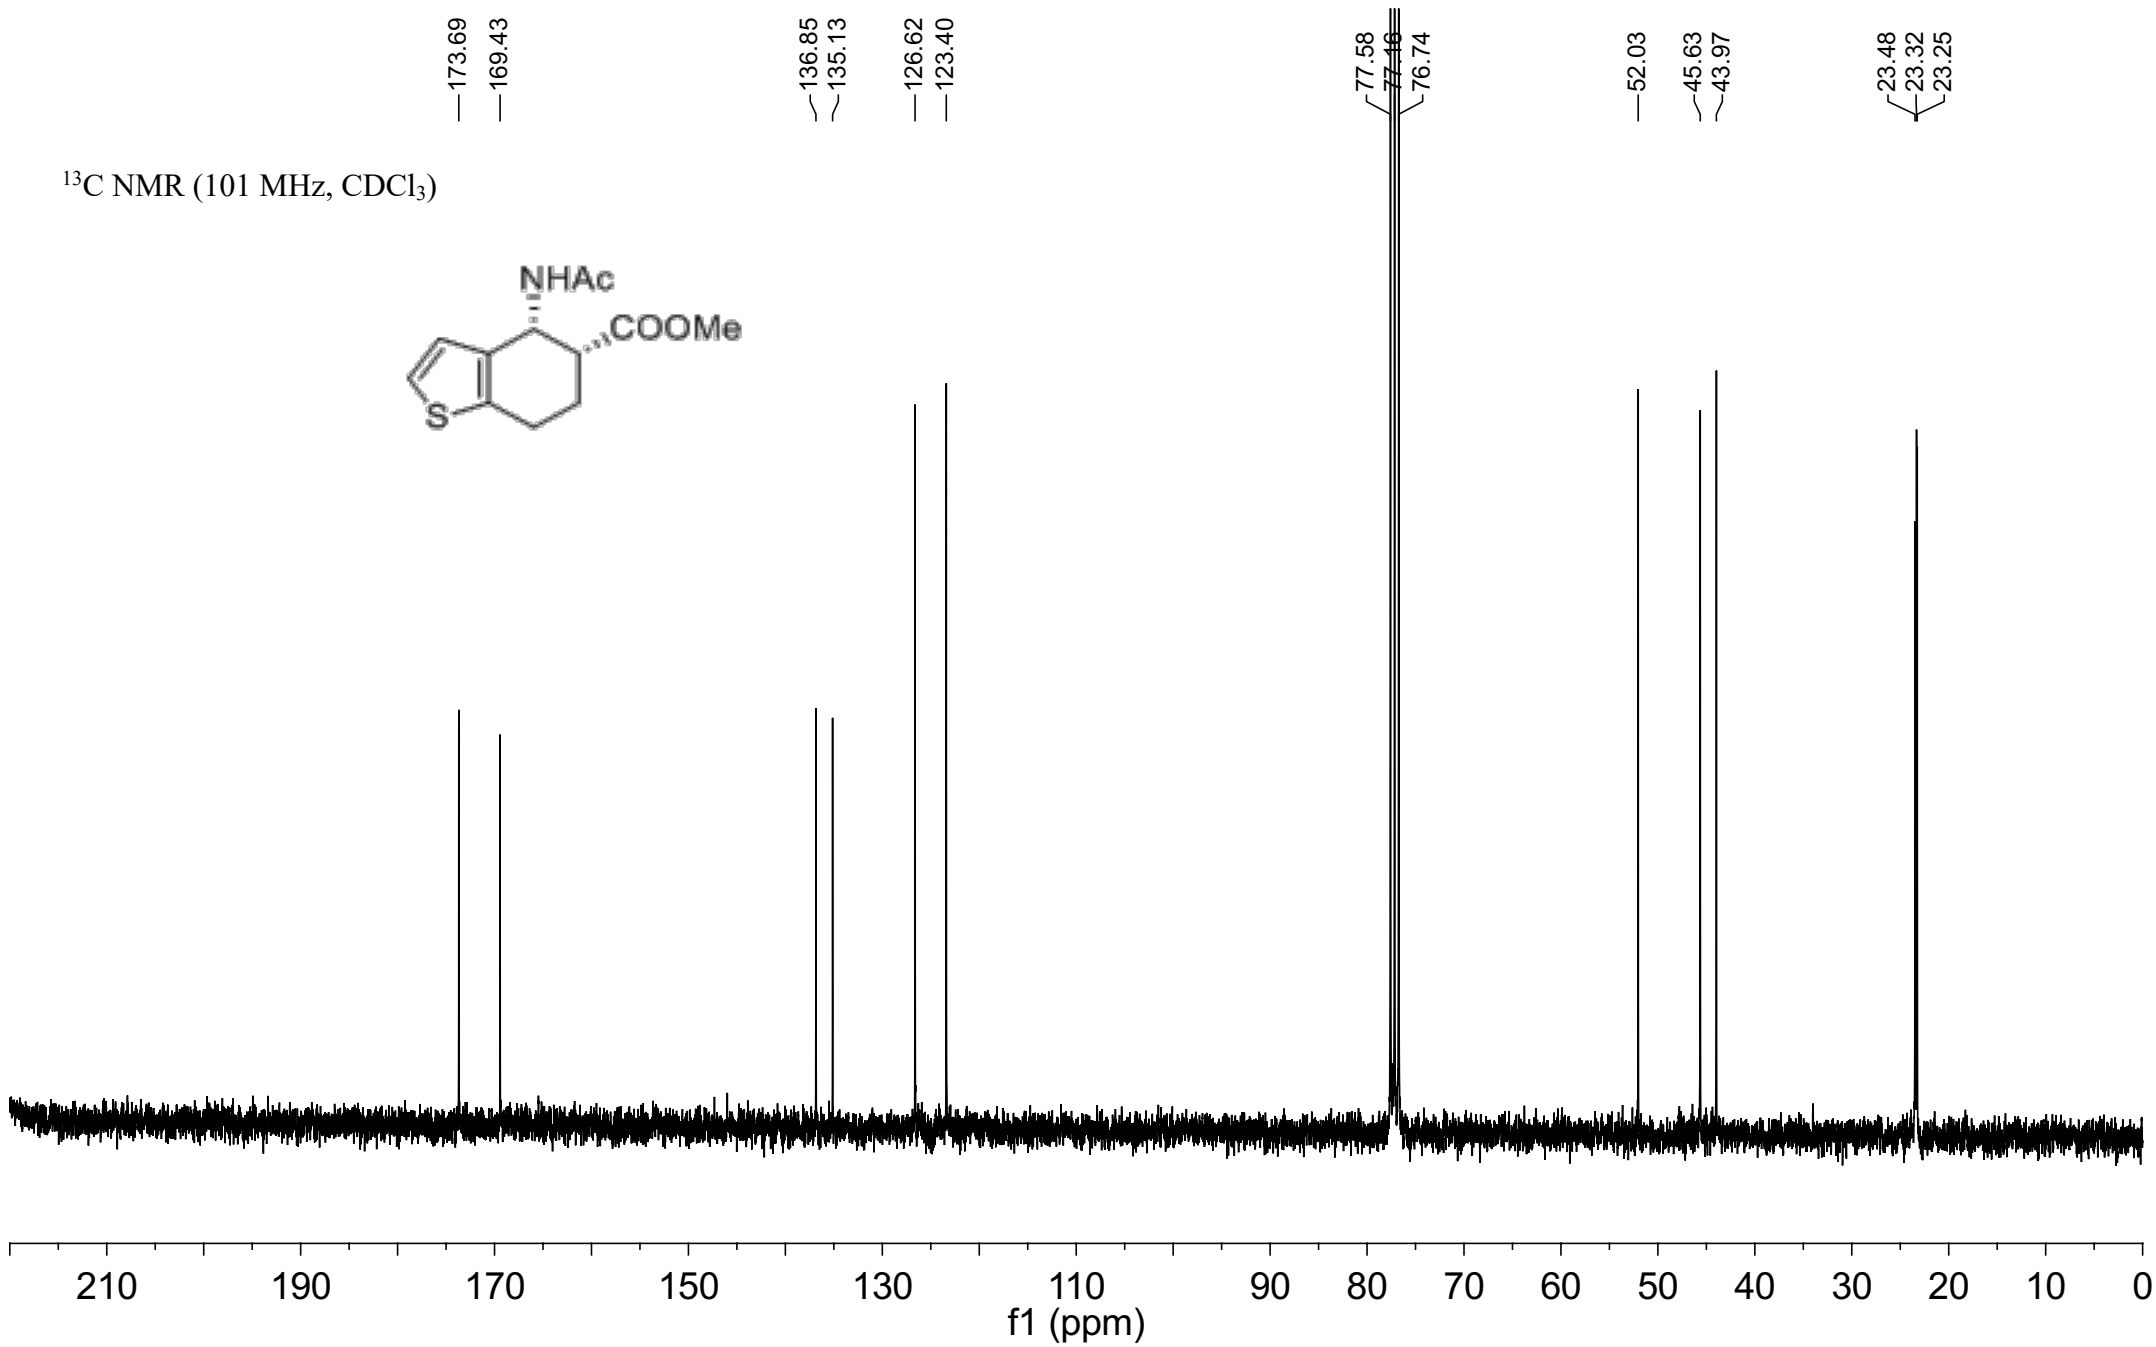

<sup>1</sup>H NMR (400 MHz, CDCl<sub>3</sub>)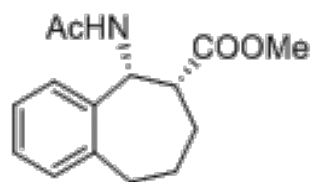

7.260  
7.247  
7.233  
7.224  
7.214  
7.176  
7.166  
7.164  
7.154  
7.142  
7.112  
7.101  
7.093  
7.079

5.948  
5.931  
5.528  
5.509  
5.490

3.627  
3.001  
2.890  
2.869  
2.854  
2.833  
2.809  
2.788  
1.940  
1.931  
1.917  
1.908  
1.900  
1.883  
1.873  
1.859  
1.851  
1.845  
1.837  
1.829  
1.814  
1.807  
1.694  
1.654  
1.647  
1.635  
1.630  
1.602  
1.594

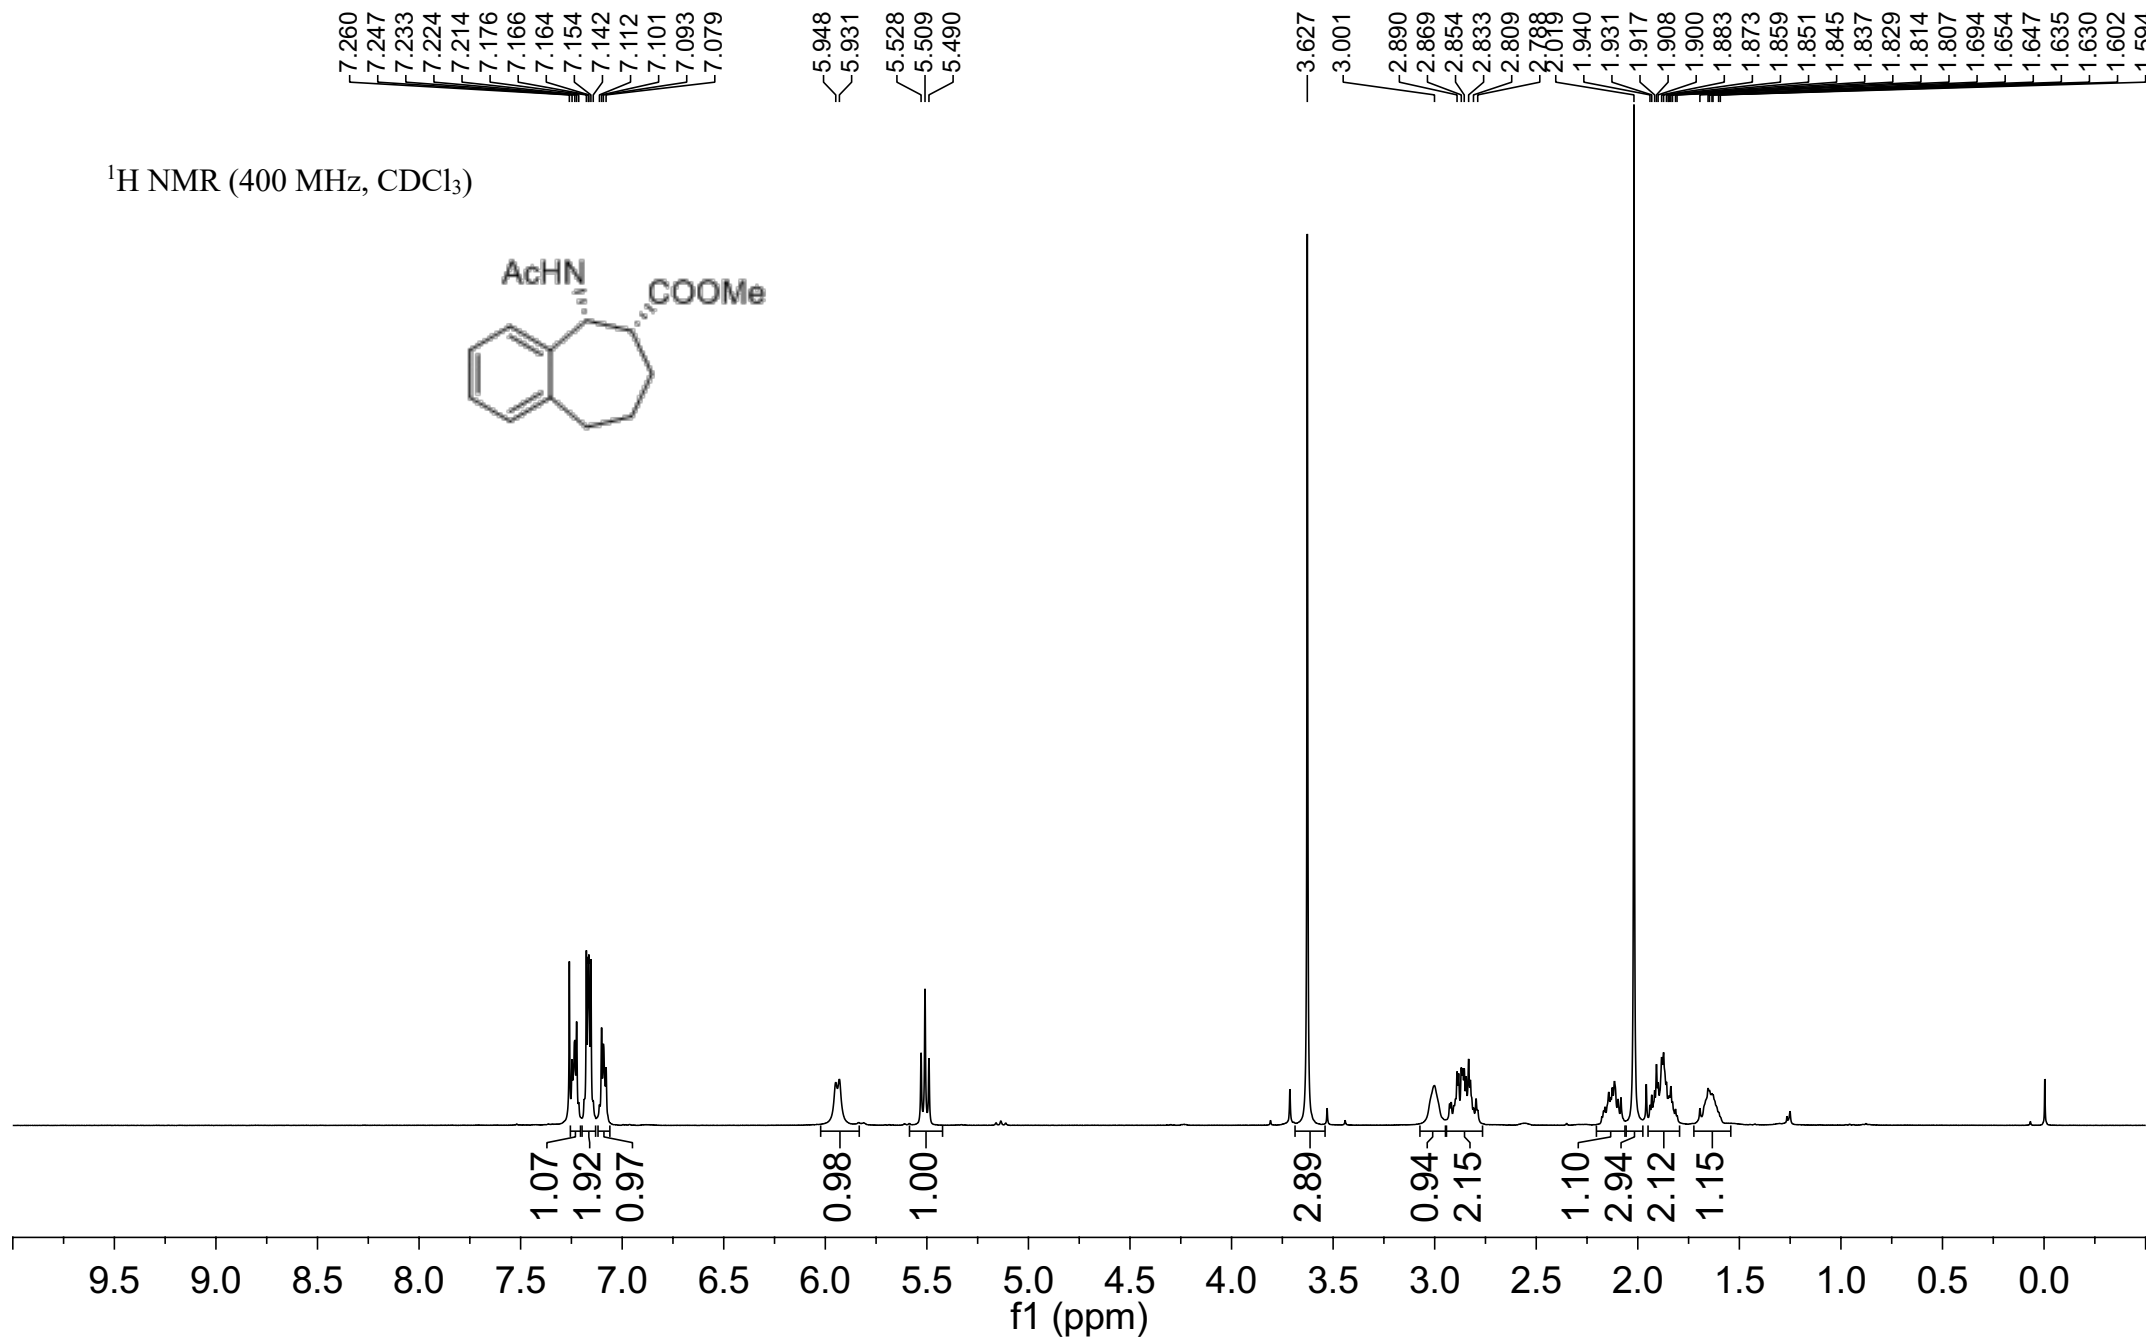

$^{13}\text{C}$  NMR (101 MHz,  $\text{CDCl}_3$ )

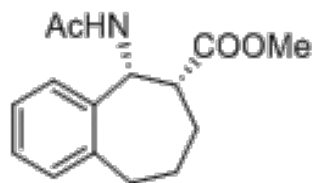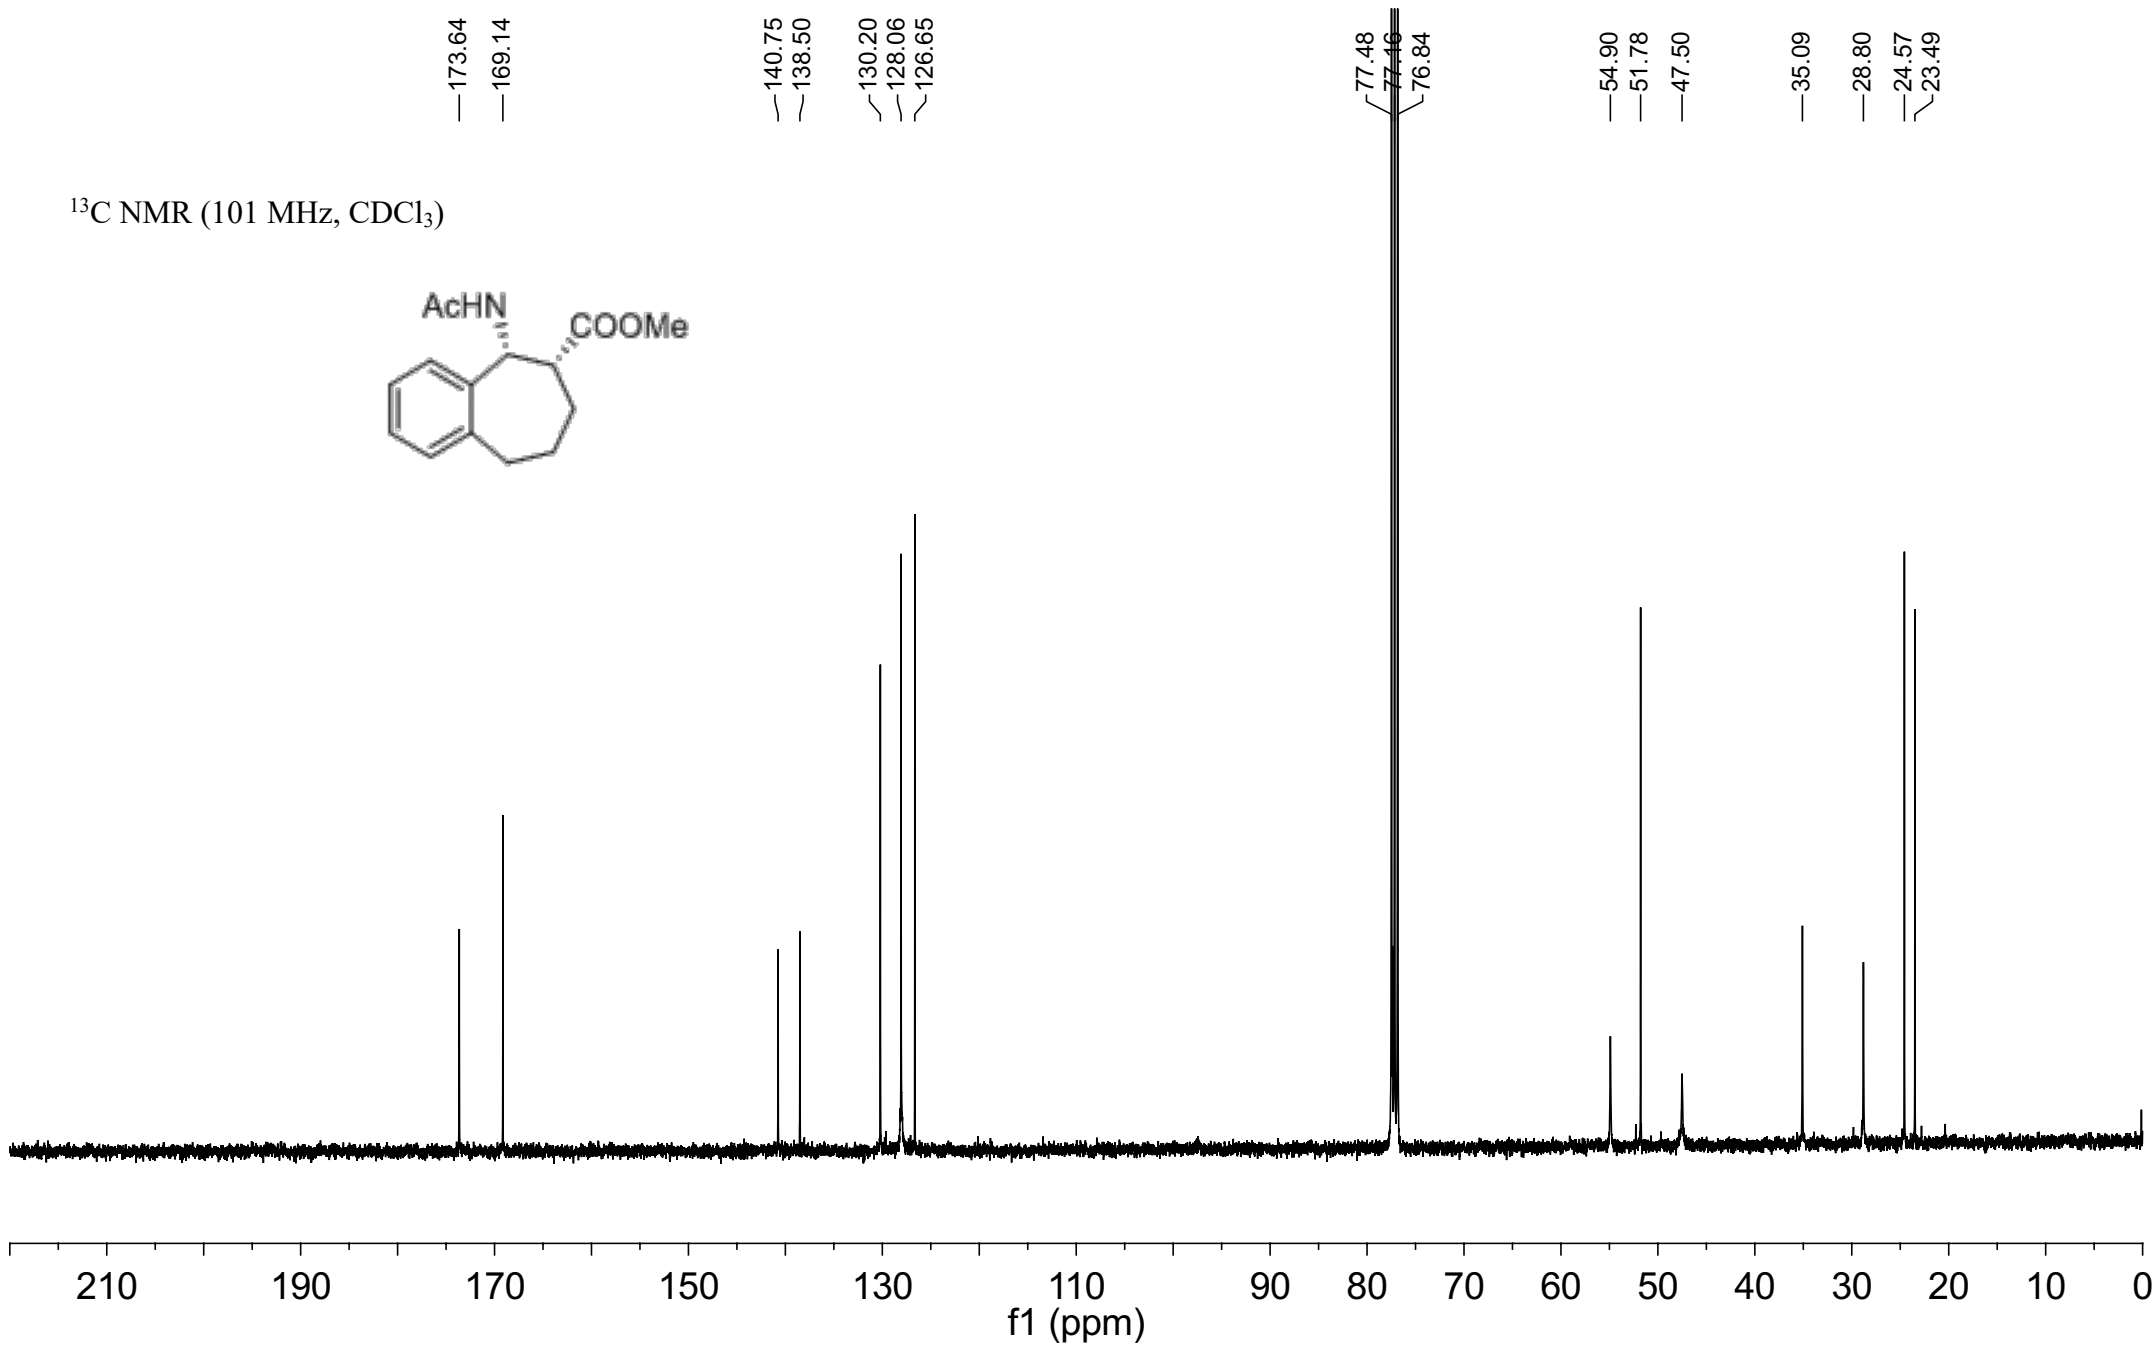

Supplement: d1cc05257h2.pdf [file d1cc05257h2.pdf]
