# Supplementary material for: Nickel-catalyzed enantioselective umpolung hydrogenation for stereoselective synthesis of β-amido esters
Source: Royal Society of Chemistry journal article supplement (doi:10.1039/d1cc05257h), 2021-01-01
Supplement: d1cc05257h1.pdf [file d1cc05257h1.pdf]

## Supporting Information

### Nickel-Catalyzed Enantioselective Umpolung Hydrogenation for the Synthesis of $\beta$ -Amido Esters

Siyu Guo, Xiaohu Zhao, Yonggui Robin Chi and Jianrong Steve Zhou\*

State Key Laboratory of Chemical Oncogenomics, Key Laboratory of Chemical Genomics, School of Chemical Biology and Biotechnology, Peking University Shenzhen Graduate School, Room F312, 2199

Lishui Road, Nanshan District, Shenzhen 518055, China. E-mail: jrzhou@pku.edu.cn

Division of Chemistry and Biological Chemistry, School of Physical and Mathematical Sciences

Nanyang Technological University, 21 Nanyang Link, Singapore 637371.

## Experimental procedures

### Table of Contents

I. General

II. Nickel-catalyzed asymmetric umpolung hydrogenation of (*Z*)- $\beta$ -amidoacrylates

III. Nickel-catalyzed asymmetric umpolung hydrogenation of cyclic  $\beta$ -amidoacrylates

VI. Reference

V. X-ray measurement and thermal ellipsoid plots of crystal structures

## I. General

All NMR spectra were acquired on Bruker AV 500 MHz, BBFO 400 MHz NMR spectrometers.  $^1\text{H}$  NMR (500 MHz) chemical shifts were recorded relative to  $\text{SiMe}_4$  ( $\delta$  0.00) or residual protiated solvents ( $\text{CDCl}_3$ :  $\delta$  7.26). Multiplicities were given as: s (singlet), d (doublet), t (triplet), q (quartet) and m (multiplet). The number of protons ( $n$ ) for a given resonance was indicated by  $n\text{H}$ . Coupling constants were reported as a  $J$  value in Hz.  $^{13}\text{C}$  NMR (125 MHz) chemical shifts were recorded relative to solvent resonance ( $\text{CDCl}_3$ :  $\delta$  77.16).

Glassware was dried at 120 °C for at least 3 h before use. Dry THF was freshly distilled from sodium/benzophenone under argon before use and stored in an argon filled glove box. Anhydrous 1,4-dioxane (Aldrich) was stored over activated 4 Å molecular sieve beads in an argon-filled glove box. Dry toluene was collected from a solvent purification system containing a column of activated alumina (1 m x 2) under argon. Methanol, ethanol and isopropanol were degassed and stored over dried molecular sieve in an argon-filled glove box before use. All anhydrous solvents were stored in Schlenk tubes in the glove box.

Unless noted otherwise, commercially available chemicals were used as received without purification. The GC internal standard,  $n\text{-C}_{12}\text{H}_{26}$  and  $n\text{-C}_{14}\text{H}_{30}$  was degassed with argon and dried over activated 4Å molecular sieve beads before use. Flash chromatography was performed using Merck 40-63D 60Å silica gel. Gas chromatography (GC) analysis was performed on a Shimadzu GC-2010 instrument with Agilent J & W GC column DB-5MS-UI. GC/MS analysis was conducted on a Thermo Scientific DSQ II single quadrupole GC/MS instrument with Agilent J & W GC column DB-5MS-UI. ESI/MS analysis was conducted on a Thermo Finnigan LCQ Fleet MS spectrometer. High resolution mass spectral analysis (HRMS) was performed on Finnigan MAT 95 XP mass spectrometer (Thermo Electron Corporation). Chiral HPLC analysis was performed on a Shimadzu LC-20AD instrument using Daicel Chiracel columns at 25°C and a mixture of HPLC-grade hexanes and isopropanol as eluent. Optical rotation was measured using a JASCO P-1030 Polarimeter equipped with a sodium vapor lamp at 589 nm and the concentration of samples was denoted as  $c$ .

## II. Nickel-catalyzed asymmetric Umpolung hydrogenation of (Z)- $\beta$ -amidoacrylates

*A general procedure:* In an argon-filled glove box, Ni(OAc)<sub>2</sub> (1.1 mg, 0.006 mmol), (S)-binapine (4.4 mg, 0.006 mmol), tetra-*n*-butylammonium iodide (14.8 mg, 0.04 mmol), indium powder (25.2 mg, 0.22 mmol, Alfa Aesar, 100 mesh, 99.9% purity) and dry methanol (0.6 mL) were charged into a 10-mL Schlenk tube. After stirring for 15 min, (Z)- $\beta$ -acylamidoacrylate (0.2 mmol) and acetic acid (35  $\mu$ L, 0.6 mmol, 3 equiv) were added. The reaction mixture was heated with stirring in an oil bath maintained at 60 °C, until almost full conversion as monitored by GC. After the reaction mixture was cooled to room temperature, solid NaHCO<sub>3</sub> was added to basify the mixture. After addition of silica gel and evaporation of the solvent on a rotary evaporator, the residue was dry loaded on a silica gel column and then purified by flash chromatography using ethyl acetate and hexanes as eluent. The enantioselectivity of the purified product was determined by chiral HPLC analysis with Daicel Chiralcel columns. The use of Schlenk tubes and a vacuum manifold gave similar results as the procedure using a glove box. All the products herein with CAS numbers have been isolated and fully characterized previously.<sup>1</sup>

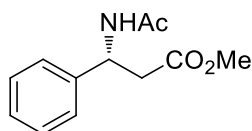

### (R)-Methyl 3-acetamido-3-phenyl-propanoate 2a [67654-57-3].

The reaction was complete in 36 h at 60 °C. The product was isolated by flash chromatography (EA/hexanes 1:1 to 2:1) as white solid. 43 mg, 97% yield. Ee: 91%.  $[\alpha]_D^{23} = +25.6^\circ$  ( $c = 0.52$ , CDCl<sub>3</sub>). Daicel Chiralcel OJ-H, *n*-hexane/isopropanol 90/10, flow rate = 1.0 mL/min.

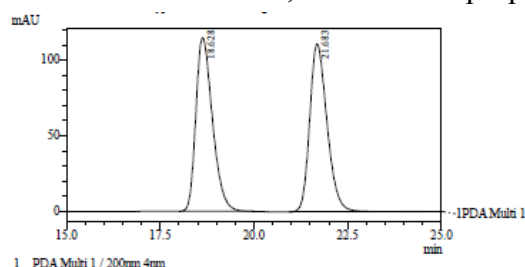

| PeakTable |           |         |         |
|-----------|-----------|---------|---------|
| Peak#     | Ret. Time | Area    | Area %  |
| 1         | 18.628    | 3543176 | 49.868  |
| 2         | 21.683    | 3581978 | 50.132  |
| Total     |           | 7105154 | 100.000 |

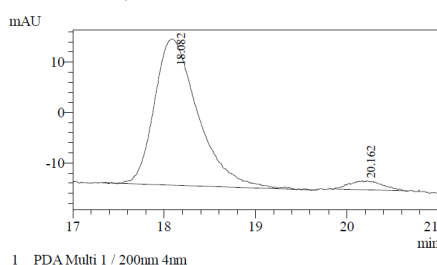

| PeakTable |           |         |         |
|-----------|-----------|---------|---------|
| Peak#     | Ret. Time | Area    | Area %  |
| 1         | 18.082    | 957107  | 95.484  |
| 2         | 20.162    | 45272   | 4.516   |
| Total     |           | 1002379 | 100.000 |

<sup>1</sup>H NMR (400 MHz, CDCl<sub>3</sub>):  $\delta$  7.45-7.13 (m, 5H), 6.68 (d,  $J = 7.5$  Hz, NH), 5.50-5.39 (m, 1H), 3.63 (s, 3H), 2.95 (dd,  $J = 15.7, 6.0$  Hz, 1H), 2.85 (dd,  $J = 15.7, 6.0$  Hz, 1H), 2.03 (s, 3H). GC-MS (EI)  $m/z$ : Calcd for C<sub>12</sub>H<sub>15</sub>NO<sub>3</sub> M<sup>+</sup>: 221.1. Found: 221.0.

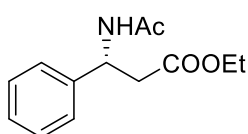

### (R)-Ethyl 3-acetamido-3-phenyl-propanoate 2b [609849-87-8].

The reaction was complete in 36 h at 60 °C. The product was isolated by flash chromatography (EA/hexanes 1:1 to 2:1) as white solid. 46 mg, 97% yield. Ee: 96%.  $[\alpha]_D^{23} = +37.4^\circ$  ( $c = 0.3$ ,  $\text{CDCl}_3$ ). Daicel Chiralcel OD-H, *n*-hexane/isopropanol 90/10, flow rate = 0.5 mL/min.

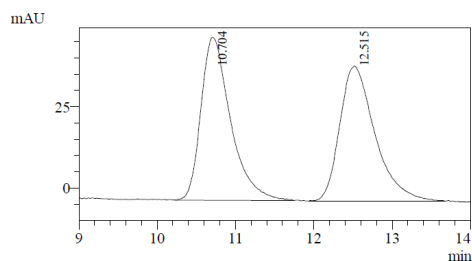

1 PDA Multi 1 / 200nm 4nm

PeakTable

| Peak# | Ret. Time | Area    | Area %  |
|-------|-----------|---------|---------|
| 1     | 10.704    | 1316006 | 50.415  |
| 2     | 12.515    | 1294335 | 49.585  |
| Total |           | 2610341 | 100.000 |

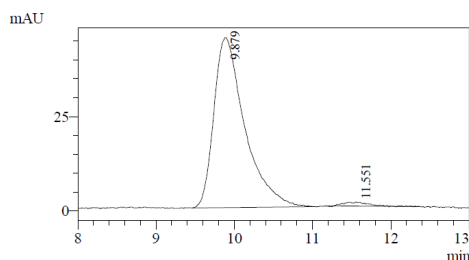

1 PDA Multi 1 / 200nm 4nm

PeakTable

| Peak# | Ret. Time | Area    | Area %  |
|-------|-----------|---------|---------|
| 1     | 9.879     | 1238150 | 98.041  |
| 2     | 11.551    | 24738   | 1.959   |
| Total |           | 1262888 | 100.000 |

$^1\text{H}$  NMR (400 MHz,  $\text{CDCl}_3$ )  $\delta$  7.43-7.18 (m, 5H), 6.66 (d,  $J = 7.6$  Hz, NH), 5.57-5.36 (m, 1H), 4.06 (q,  $J = 7.1$  Hz, 2H), 2.91 (dd,  $J = 15.6, 6.0$  Hz, 1H), 2.81 (dd,  $J = 15.6, 6.0$  Hz, 1H), 2.01 (s, 3H), 1.16 (t,  $J = 7.1$  Hz, 3H). GC-MS (EI)  $m/z$ : Calcd for  $\text{C}_{13}\text{H}_{17}\text{NO}_3$   $M^+$ : 235.1 Found: 235.1.

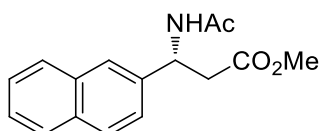

### (R)-Methyl 3-acetamido-3-(2-naphthyl)propanoate 2c [1642872-44-3].

The reaction completed in 36 h at 60 °C. The product was isolated by flash chromatography (EA/hexanes 1:1 to 2:1) as white solid. 52 mg, 96% yield. Ee: 92%.  $[\alpha]_D^{25} = +64.4^\circ$  ( $c = 0.48$ ,  $\text{CDCl}_3$ ). Daicel Chiralcel OJ-H, *n*-hexane/isopropanol 90/10, flow rate = 1.0 mL/min.

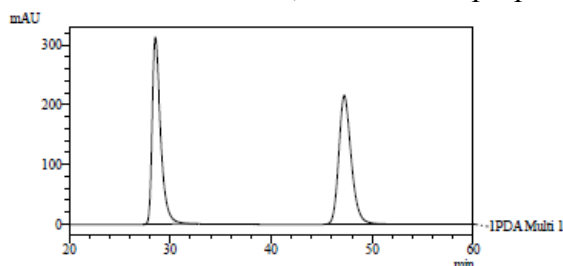

1 PDA Multi 1 / 220nm 4nm

PeakTable

| Peak# | Ret. Time | Area     | Area %  |
|-------|-----------|----------|---------|
| 1     | 28.527    | 18264693 | 49.817  |
| 2     | 47.243    | 18398972 | 50.183  |
| Total |           | 36663664 | 100.000 |

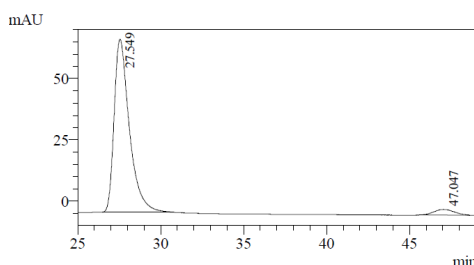

1 PDA Multi 1 / 220nm 4nm

PeakTable

| Peak# | Ret. Time | Area    | Area %  |
|-------|-----------|---------|---------|
| 1     | 27.549    | 4506221 | 95.901  |
| 2     | 47.047    | 192604  | 4.099   |
| Total |           | 4698824 | 100.000 |

$^1\text{H}$  NMR (400 MHz,  $\text{CDCl}_3$ ):  $\delta$  7.86-7.76 (m, 3H), 7.73 (s, 1H), 7.57-7.44 (m, 2H), 7.43-7.31 (m, 1H), 6.82-6.54 (br s, NH), 5.67-5.46 (m, 1H), 3.60 (s, 3H), 3.03 (dd,  $J = 15.8, 5.8$  Hz, 1H), 2.93 (dd,  $J = 15.8, 6.0$  Hz, 1H), 2.02 (s, 3H). GC-MS (EI)  $m/z$ : Calcd for  $\text{C}_{16}\text{H}_{17}\text{NO}_3$   $M^+$ : 271.1. Found: 271.0.

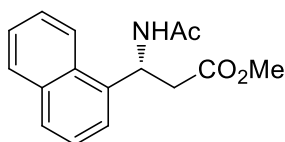

**(R)-Methyl 3-acetamido-3-(1-naphthyl)propanoate 2d [1642855-01-3].**

The reaction was finished in 24 h at 60 °C. The product was isolated by flash chromatography (EA/hexanes 1:1 to 2:1) as white solid. 50 mg, 92% yield. Ee: 84%.  $[\alpha]_D^{23} = +27.4^\circ$  ( $c = 0.32$ ,  $\text{CDCl}_3$ ). Daicel Chiralcel OJ-H, n-hexane/isopropanol 90/10, flow rate = 1.0 mL/min.

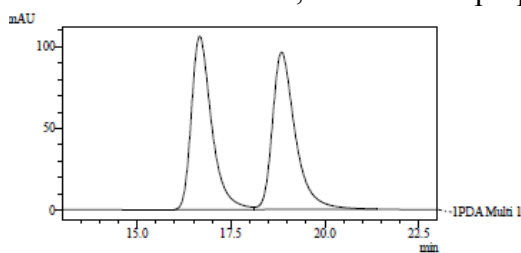

1 PDA Multi 1 / 220nm 4nm

| PeakTable |           |         |         |
|-----------|-----------|---------|---------|
| Peak#     | Ret. Time | Area    | Area %  |
| 1         | 16.661    | 4004906 | 49.593  |
| 2         | 18.843    | 4070568 | 50.407  |
| Total     |           | 8075474 | 100.000 |

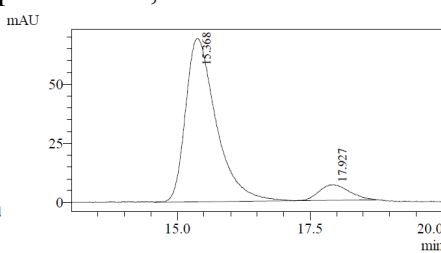

1 PDA Multi 1 / 200nm 4nm

| PeakTable |           |         |         |
|-----------|-----------|---------|---------|
| Peak#     | Ret. Time | Area    | Area %  |
| 1         | 15.368    | 2773474 | 91.232  |
| 2         | 17.927    | 266545  | 8.768   |
| Total     |           | 3040020 | 100.000 |

$^1\text{H}$  NMR (400 MHz,  $\text{CDCl}_3$ ):  $\delta$  8.10 (d,  $J = 8.4$  Hz, 1H), 7.90-7.83 (m, 1H), 7.83-7.76 (m, 1H), 7.63-7.46 (m, 2H), 7.46-7.36 (m, 2H), 6.50 (d,  $J = 8.0$  Hz, NH), 6.31-6.15 (m, 1H), 3.59 (s, 3H), 3.10-2.96 (m, 2H), 1.98 (s, 3H). GC-MS (EI)  $m/z$ : Calcd for  $\text{C}_{16}\text{H}_{17}\text{NO}_3$   $M^+$ : 271.1. Found: 271.0.

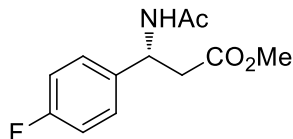

**(R)-Methyl 3-acetamido-3-(4-fluorophenyl)propanoate 2e [844439-54-9].**

The reaction completed in 36 h at 60 °C. The product was isolated by flash chromatography (EA/hexanes 1:1 to 2:1) as white solid. 46 mg, 96% yield.  $[\alpha]_D^{23} = +22.3^\circ$  ( $c = 0.52$ ,  $\text{CDCl}_3$ ).

Ee: 94%. Daicel Chiralcel OJ-H, n-hexane/isopropanol 90/10, flow rate = 1.0 mL/min.

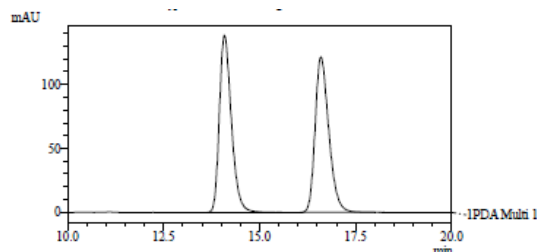

1 PDA Multi 1 / 200nm 4nm

| PeakTable |           |         |         |
|-----------|-----------|---------|---------|
| Peak#     | Ret. Time | Area    | Area %  |
| 1         | 14.079    | 3020011 | 50.035  |
| 2         | 16.392    | 3013794 | 49.965  |
| Total     |           | 6033805 | 100.000 |

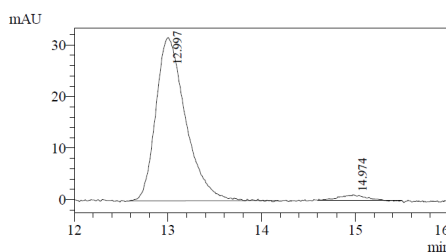

1 PDA Multi 1 / 200nm 4nm

| PeakTable |           |        |         |
|-----------|-----------|--------|---------|
| Peak#     | Ret. Time | Area   | Area %  |
| 1         | 12.997    | 696938 | 96.917  |
| 2         | 14.974    | 22173  | 3.083   |
| Total     |           | 719111 | 100.000 |

$^1\text{H}$  NMR (400 MHz,  $\text{CDCl}_3$ ):  $\delta$  7.37-7.18 (m, 2H), 7.06-6.94 (m, 2H), 6.66 (d,  $J = 7.7$  Hz, NH), 5.51-5.29 (m, 1H), 3.61 (s, 3H), 2.90 (dd,  $J = 15.8, 5.8$  Hz, 1H), 2.81 (dd,  $J = 15.8, 5.9$  Hz, 1H), 2.01 (s, 3H).

GC-MS (EI) m/z: Calcd for C<sub>12</sub>H<sub>14</sub>FNO<sub>3</sub> (M)<sup>+</sup>: 239.1. Found: 239.0.

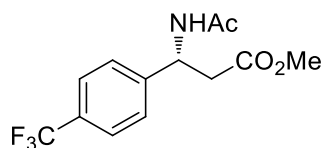

**(R)-Methyl 3-acetamido-3-[4-(trifluoromethyl)phenyl]propanoate 2f [1642855-02-4].**

The reaction was complete in 36 h at 60 °C. The product was isolated by flash chromatography (EA/hexane 1:1 to 2:1) as white solid. 55 mg, 95% yield. Ee: 89%.  $[\alpha]_D^{23} = +11.3^\circ$  ( $c = 0.32$ , CDCl<sub>3</sub>). Daicel Chiralcel OD-H, n-hexane/isopropanol 90/10, flow rate = 0.5 mL/min.

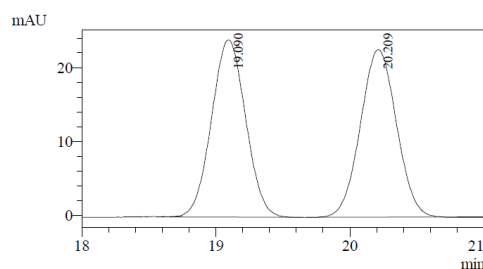

1 PDA Multi 1 / 254nm 4nm

PeakTable

| Peak# | Ret. Time | Area   | Area %  |
|-------|-----------|--------|---------|
| 1     | 19.090    | 425046 | 50.073  |
| 2     | 20.209    | 423800 | 49.927  |
| Total |           | 848846 | 100.000 |

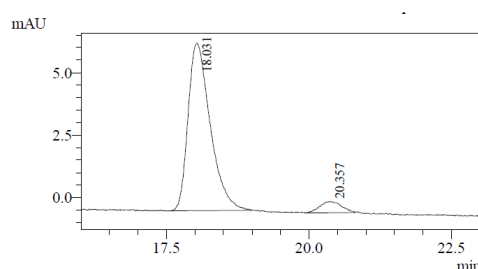

1 PDA Multi 1 / 254nm 4nm

PeakTable

| Peak# | Ret. Time | Area   | Area %  |
|-------|-----------|--------|---------|
| 1     | 18.031    | 181668 | 94.020  |
| 2     | 20.357    | 11555  | 5.980   |
| Total |           | 193223 | 100.000 |

<sup>1</sup>H NMR (400 MHz, CDCl<sub>3</sub>):  $\delta$  7.59 (d,  $J = 8.2$  Hz, 2H), 7.41 (d,  $J = 8.1$  Hz, 2H), 6.70 (d,  $J = 8.0$  Hz, NH), 5.60-5.38 (m, 1H), 3.63 (s, 3H), 2.94 (dd,  $J = 16.1, 5.9$  Hz, 1H), 2.87 (dd,  $J = 16.0, 5.8$  Hz, 1H), 2.06 (s, 3H). GC-MS (EI) m/z: Calcd for C<sub>13</sub>H<sub>14</sub>F<sub>3</sub>NO<sub>3</sub> M<sup>+</sup>: 289.1. Found: 289.0.

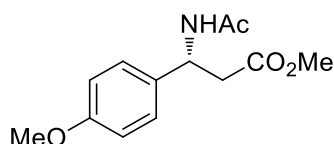

**(R)-Methyl 3-acetamido-3-(4-methoxyphenyl)propanoate 2g [810670-02-1].**

The reaction completed in 24 h at 60 °C. The product was isolated by flash chromatography (EA/hexanes 1:1 to 2:1) as white solid. 48 mg, 96% yield. Ee: 92%.  $[\alpha]_D^{23} = +65.6^\circ$  ( $c = 0.43$ , CDCl<sub>3</sub>). Daicel Chiralcel OJ-H, n-hexane/isopropanol 90/10, flow rate = 1.0 mL/min.

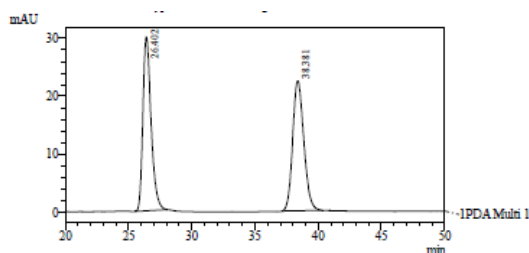

1 PDA Multi 1 / 218nm 4nm

| PeakTable |           |         |         |
|-----------|-----------|---------|---------|
| Peak#     | Ret. Time | Area    | Area %  |
| 1         | 26.402    | 1350840 | 49.657  |
| 2         | 38.381    | 1369508 | 50.343  |
| Total     |           | 2720348 | 100.000 |

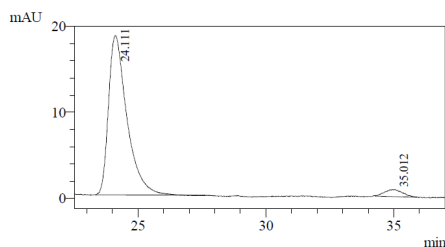

1 PDA Multi 1 / 210nm 4nm

| PeakTable |           |        |         |
|-----------|-----------|--------|---------|
| Peak#     | Ret. Time | Area   | Area %  |
| 1         | 24.111    | 929651 | 96.068  |
| 2         | 35.012    | 38048  | 3.932   |
| Total     |           | 967698 | 100.000 |

$^1\text{H}$  NMR (400 MHz,  $\text{CDCl}_3$ ):  $\delta$  7.19 (d,  $J$  = 8.6 Hz, 2H), 6.83 (d,  $J$  = 8.6 Hz, 2H), 6.60 (br s, NH), 5.47-5.23 (m, 1H), 3.76 (s, 3H), 3.60 (s, 3H), 2.90 (dd,  $J$  = 15.6, 6.0 Hz, 1H), 2.78 (dd,  $J$  = 15.7, 6.3 Hz, 1H), 1.97 (d,  $J$  = 0.8 Hz, 3H). GC-MS (EI)  $m/z$ : Calcd for  $\text{C}_{13}\text{H}_{17}\text{NO}_4$   $M^+$ : 251.1. Found: 251.0.

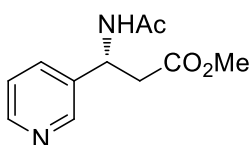

### (*R*)-Methyl 3-acetamido-3-(3-pyridyl)propanoate 2h [1642855-03-5].

The reaction was complete in 36 h at 60 °C. The product was isolated by flash chromatography (MeOH/DCM 1:10) as yellow solid. 41 mg, 92% yield. Ee: 98%.  $[\alpha]_D^{23} = +43.2^\circ$  ( $c$  = 0.6,  $\text{CDCl}_3$ ).

Daicel Chiralcel OJ-H, n-hexane/isopropanol 90/10, flow rate = 1.0 mL/min.

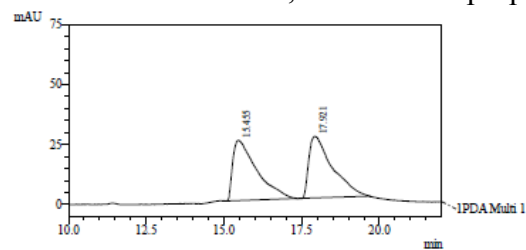

1 PDA Multi 1 / 199nm 4nm

| PeakTable |           |         |         |
|-----------|-----------|---------|---------|
| Peak#     | Ret. Time | Area    | Area %  |
| 1         | 15.455    | 1338310 | 49.785  |
| 2         | 17.921    | 1349846 | 50.215  |
| Total     |           | 2688156 | 100.000 |

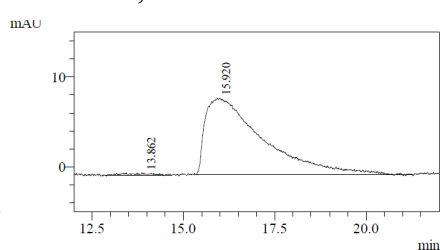

1 PDA Multi 1 / 200nm 4nm

| PeakTable |           |        |         |
|-----------|-----------|--------|---------|
| Peak#     | Ret. Time | Area   | Area %  |
| 1         | 13.862    | 8922   | 0.942   |
| 2         | 15.920    | 938391 | 99.058  |
| Total     |           | 947312 | 100.000 |

$^1\text{H}$  NMR (400 MHz,  $\text{CDCl}_3$ ):  $\delta$  8.56 (s, 1H), 8.49 (d,  $J$  = 4.0 Hz, 1H), 7.67-7.58 (m, 1H), 7.26-7.20 (m, 1H), 6.95 (d,  $J$  = 8.1 Hz, NH), 5.62-5.23 (m, 1H), 3.62 (s, 3H), 2.94 (dd,  $J$  = 16.1, 5.8 Hz, 1H), 2.96 (dd,  $J$  = 16.1, 5.8 Hz, 1H), 2.02 (s, 3H). GC-MS (EI)  $m/z$ : Calcd for  $\text{C}_{11}\text{H}_{14}\text{N}_2\text{O}_3$   $M^+$ : 222.1. Found: 222.0.

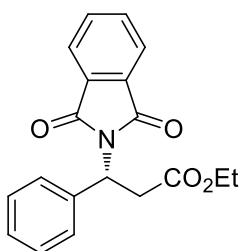

**(R)-Ethyl 3-phthalimido-3-phenylpropanoate 2i [1204518-31-9].**

The product was isolated by flash chromatography (EA/hexane 1:3) as white solid. 62 mg, 96% yield. Ee: 88%.  $[\alpha]_D^{23} = +10.3^\circ$  ( $c = 0.42$ ,  $\text{CHCl}_3$ ). Daicel Chiralcel OJ-H, n-hexane/isopropanol 90/10, flow rate = 1.0 mL/min.

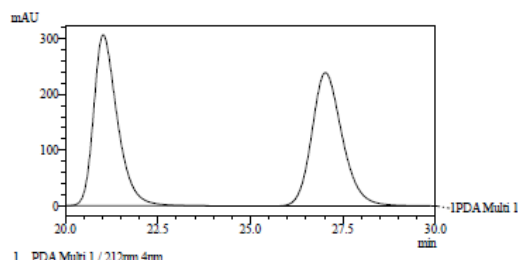

| PeakTable |           |          |         |
|-----------|-----------|----------|---------|
| Peak#     | Ret. Time | Area     | Area %  |
| 1         | 21.021    | 13661903 | 50.053  |
| 2         | 27.023    | 13833928 | 49.947  |
| Total     |           | 27294831 | 100.000 |

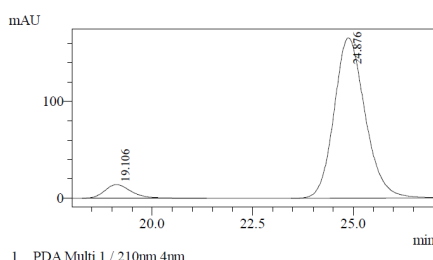

| PeakTable |           |         |         |
|-----------|-----------|---------|---------|
| Peak#     | Ret. Time | Area    | Area %  |
| 1         | 19.106    | 647414  | 6.755   |
| 2         | 24.876    | 8936670 | 93.245  |
| Total     |           | 9584083 | 100.000 |

$^1\text{H}$  NMR (400 MHz,  $\text{CDCl}_3$ ):  $\delta$  7.86-7.76 (m, 2H), 7.72-7.64 (m, 2H), 7.56-7.44 (m, 2H), 7.38-7.24 (m, 3H), 5.84 (dd,  $J = 10.2, 5.7$  Hz, 1H), 4.22-4.39 (m, 2H), 3.79 (dd,  $J = 16.4, 10.3$  Hz, 1H), 3.24 (dd,  $J = 16.4, 5.7$  Hz, 1H), 1.14 (t,  $J = 7.1$  Hz, 3H). GC-MS (EI)  $m/z$ : Calcd for  $\text{C}_{19}\text{H}_{17}\text{NO}_4$   $M^+$ : 323.1. Found: 323.1.

**III. Nickel-catalyzed asymmetric umpolung hydrogenation of cyclic  $\beta$ -amidoacrylates**

*A general procedure:* In an argon-filled glove box,  $\text{Ni}(\text{OAc})_2$  (1.8 mg, 0.01 mmol), (*R*)-QuinoxP\* (4.0 mg, 0.012 mmol), indium powder (34.4 mg, 0.3 mmol, Alfa Aesar, 100 mesh, 99.9% purity) and dry methanol (0.8 mL) were charged into a 10-mL Schlenk tube. After stirring for 15 min, cyclic  $\beta$ -amidoacrylate (0.2 mmol) and acetic acid (35  $\mu\text{L}$ , 0.6 mmol, 3 equiv) were added. The reaction mixture was heated with stirring in an oil bath maintained at 80  $^\circ\text{C}$  for 60 h. After the reaction mixture was cooled to room temperature, solid  $\text{NaHCO}_3$  was added to basify the mixture. After addition of silica gel and evaporation of the solvent on a rotary evaporator, the residue was dry loaded on a silica gel column and purified by flash chromatography using ethyl acetate and hexanes as eluent. The ratio of diastereomers was determined by GC and confirmed by GCMS and they were separable on silica gel. The enantioselectivity of the main isomer was determined by chiral HPLC analysis with Daicel Chiralcel columns. All the products (main isomers) herein with CAS numbers have been isolated and fully characterized previously.

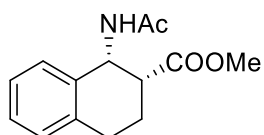**(1R,2R)-Methyl 1-acetamidotetralin-2-carboxylate 4a [126662-34-8].**

The reaction was completed after 60 h at 80  $^\circ\text{C}$ . The product was isolated by flash chromatography (hexanes/EA 2:1) as white solid. 44 mg, 89% yield. 96/4 dr. Ee: 95%.  $[\alpha]_D^{20} = +52.7^\circ$  ( $c = 1.3$ ,  $\text{CHCl}_3$ ).

Daicel Chiralcel AD-H, *n*-hexane/isopropanol 98/2, flow rate = 0.5 mL/min. Fractions of racemic samples were used containing high percentages of the *trans*-isomers (with greater retention times).

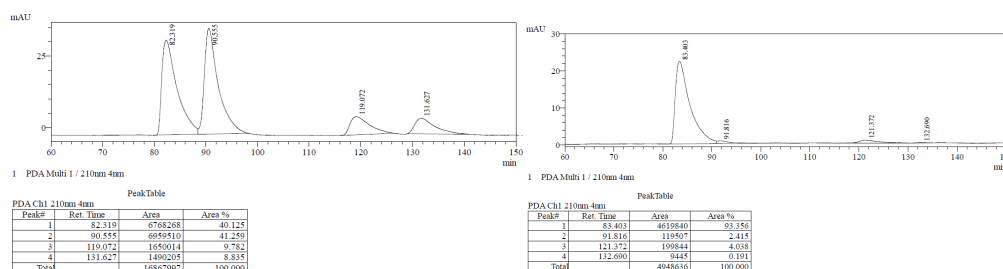

$^1\text{H}$  NMR (400 MHz,  $\text{CDCl}_3$ ):  $\delta$  7.30-7.27 (m, 1H), 7.19-7.15 (m, 2H), 7.10-7.06 (m, 1H), 6.24 (d,  $J = 9.3$  Hz, NH), 5.55 ( $\psi$ q,  $J = 4.8$  Hz, 1H), 3.69 (s, 3H), 3.07-3.03 (m, 1H), 2.88-2.74 (m, 2H), 2.19-2.07 (m, 2H), 2.01 (s, 3H).  $^{13}\text{C}$  NMR (101 MHz,  $\text{CDCl}_3$ ):  $\delta$  174.0, 169.6, 136.0, 135.7, 129.0, 128.2, 127.5, 126.7, 52.0, 48.0, 44.0, 27.1, 23.6, 22.8. HRMS (ESI)  $m/z$ : Calcd for  $\text{C}_{14}\text{H}_{18}\text{NO}_3$   $[\text{M}+\text{H}]^+$ : 248.1286; Found: 248.1290.

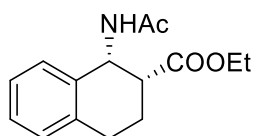

### (1*R*,2*R*)-Ethyl 1-acetamidotetralin-2-carboxylate **4b**

The reaction was complete after 60 h at 80 °C. The product was isolated by flash chromatography (hexanes/EA 2:1) as white solid. 48 mg, 91% yield. Ee: 95%. 93/7 dr.  $[\alpha]_D^{20} = +62.5^\circ$  ( $c = 0.9$ ,  $\text{CHCl}_3$ ). Daicel Chiralcel AD-H, *n*-hexane/isopropanol 95/5, flow rate = 0.5 mL/min.

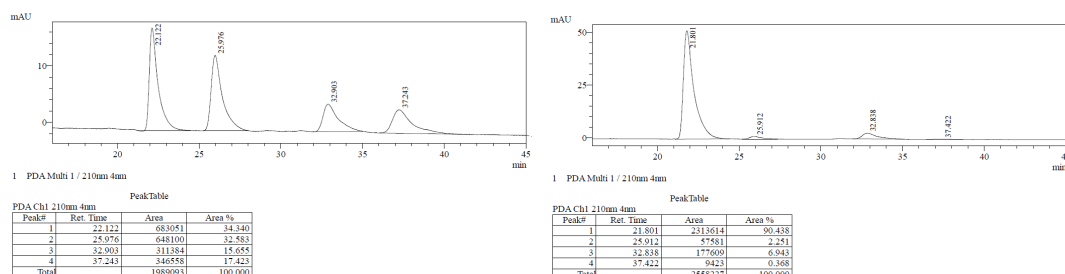

$^1\text{H}$  NMR (400 MHz,  $\text{CDCl}_3$ ):  $\delta$  7.31-7.27 (m, 1H), 7.18-7.14 (m, 2H), 7.09-7.05 (m, 1H), 6.29 (d,  $J = 9.6$  Hz, NH), 5.55 ( $\psi$ q,  $J = 4.9$  Hz, 1H), 4.17-4.09 (m, 2H), 3.05-3.01 (m, 1H), 2.88-2.73 (m, 2H), 2.18-2.07 (m, 2H), 2.00 (s, 3H), 1.25 (t,  $J = 7.1$  Hz, 3H).  $^{13}\text{C}$  NMR (101 MHz,  $\text{CDCl}_3$ ):  $\delta$  173.5, 169.6, 136.2, 135.7, 128.9, 128.1, 127.4, 126.6, 60.9, 47.9, 44.0, 27.1, 23.6, 22.9, 14.3. HRMS (ESI)  $m/z$ : Calcd for  $\text{C}_{15}\text{H}_{20}\text{NO}_3$   $[\text{M}+\text{H}]^+$ : 262.1443; Found: 262.1449.

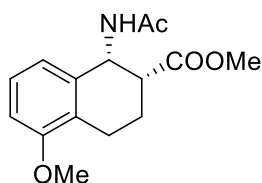

### (1*R*,2*R*)-Methyl 5-methoxy-1-acetamidotetralin-2-carboxylate **4c**

The reaction was complete after 60 h at 80 °C. The product was isolated by flash chromatography (hexanes/EA 2:1) as white solid. 52 mg, 93% yield. Ee: 95%. 95/5 dr.  $[\alpha]_D^{20} = +62.7^\circ (c = 1.1, \text{CHCl}_3)$ . Daicel Chiralcel AD-H, *n*-hexane/isopropanol 96/4, flow rate = 0.5 mL/min.

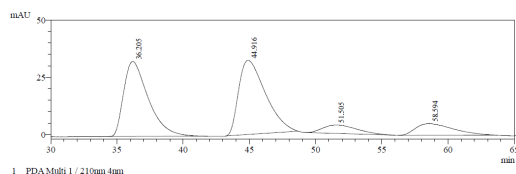

| PeakTable |           |          |         |
|-----------|-----------|----------|---------|
| Peak#     | Ret. Time | Area     | Area %  |
| 1         | 36.205    | 4235156  | 40.399  |
| 2         | 44.916    | 4575977  | 43.650  |
| 3         | 51.505    | 669098   | 6.388   |
| 4         | 58.094    | 1002457  | 9.563   |
| Total     |           | 10483388 | 100.000 |

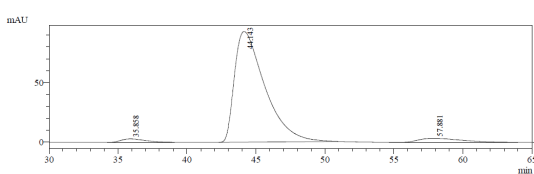

| PeakTable |           |          |         |
|-----------|-----------|----------|---------|
| Peak#     | Ret. Time | Area     | Area %  |
| 1         | 35.858    | 340005   | 2.278   |
| 2         | 44.143    | 14247792 | 92.991  |
| 3         | 57.881    | 724899   | 4.731   |
| Total     |           | 15321751 | 100.000 |

$^1\text{H}$  NMR (400 MHz,  $\text{CDCl}_3$ ):  $\delta$  7.14 (t,  $J = 8.0$  Hz, 1H), 6.89 (d,  $J = 7.9$  Hz, 1H), 6.70 (d,  $J = 8.1$  Hz, 1H), 6.30 (d,  $J = 9.2$  Hz, NH), 5.51 ( $\psi$ q,  $J = 4.6$  Hz, 1H), 3.79 (s, 3H), 3.67 (s, 3H), 3.00-2.96 (m, 1H), 2.74-2.58 (m, 2H), 2.15-2.02 (m, 2H), 1.98 (m, 3H).  $^{13}\text{C}$  NMR (101 MHz,  $\text{CDCl}_3$ ):  $\delta$  174.0, 169.5, 156.9, 137.1, 127.0, 124.8, 120.0, 108.5, 55.4, 51.9, 48.0, 43.6, 23.5, 22.1, 21.2. HRMS (ESI)  $m/z$ : Calcd for  $\text{C}_{15}\text{H}_{20}\text{NO}_4$   $[\text{M}+\text{H}]^+$ : 278.1392; Found: 278.1399.

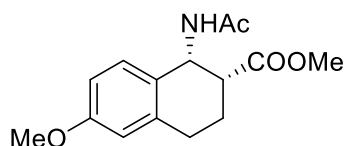

#### (1R,2R)-Methyl 6-methoxy-1-acetamidotetralin-2-carboxylate 4d

The reaction was complete after 60 h at 80 °C. The product was isolated by flash chromatography (hexanes/EA 2:1) as white solid. 46 mg, 83% yield. Ee: 97%. 96/4 dr.  $[\alpha]_D^{20} = +79.1^\circ (c = 0.9, \text{CHCl}_3)$ . Daicel Chiralcel OJ-H, *n*-hexane/isopropanol 90/10, flow rate = 0.5 mL/min.

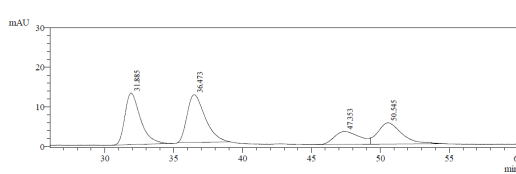

| PeakTable |           |         |         |
|-----------|-----------|---------|---------|
| Peak#     | Ret. Time | Area    | Area %  |
| 1         | 31.885    | 1028886 | 32.330  |
| 2         | 36.473    | 1094461 | 34.390  |
| 3         | 47.553    | 415511  | 13.056  |
| 4         | 50.545    | 643598  | 20.223  |
| Total     |           | 3182455 | 100.000 |

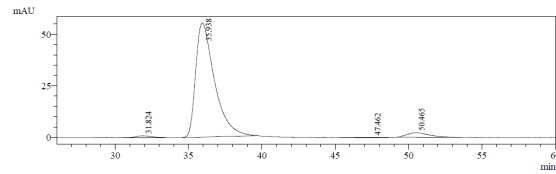

| PeakTable |           |         |         |
|-----------|-----------|---------|---------|
| Peak#     | Ret. Time | Area    | Area %  |
| 1         | 31.824    | 64362   | 1.227   |
| 2         | 35.938    | 4949650 | 94.332  |
| 3         | 47.462    | 2279    | 0.043   |
| 4         | 50.465    | 330755  | 6.398   |
| Total     |           | 5247047 | 100.000 |

$^1\text{H}$  NMR (400 MHz,  $\text{CDCl}_3$ ):  $\delta$  7.18 (d,  $J = 8.7$  Hz, 1H), 6.72 (dd,  $J = 8.6, 2.7$  Hz, 1H), 6.58 (d,  $J = 2.6$  Hz, 1H), 6.18 (d,  $J = 9.5$  Hz, NH), 5.48 ( $\psi$ q,  $J = 4.8$  Hz, 1H), 3.75 (s, 3H), 3.67 (s, 3H), 3.01-2.97 (m, 1H), 2.84-2.69 (m, 2H), 2.10-2.05 (m, 2H), 1.98 (m, 3H).  $^{13}\text{C}$  NMR (101 MHz,  $\text{CDCl}_3$ ):  $\delta$  173.9, 169.5, 158.9, 137.1, 129.6, 128.2, 113.4, 113.0, 55.3, 52.0, 47.5, 44.2, 27.6, 23.5, 22.4. HRMS (ESI)  $m/z$ : Calcd for  $\text{C}_{15}\text{H}_{20}\text{NO}_4$   $[\text{M}+\text{H}]^+$ : 278.1392; Found: 278.1395.

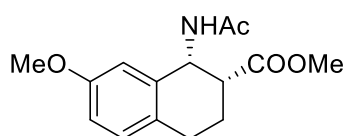

### (1*R*,2*R*)-Methyl 7-methoxy-1-acetamidotetralin-2-carboxylate **4e**

The reaction was complete after 60 h at 80 °C. The product was isolated by flash chromatography (hexanes/EA 2:1) as white solid. 50 mg, 90% yield. Ee: 97%. 94/6 dr.  $[\alpha]_D^{20} = +42.3^\circ (c = 1.2, \text{CHCl}_3)$ .

Daicel Chiralcel OJ-H, *n*-hexane/isopropanol 96/4, flow rate = 0.5 mL/min.

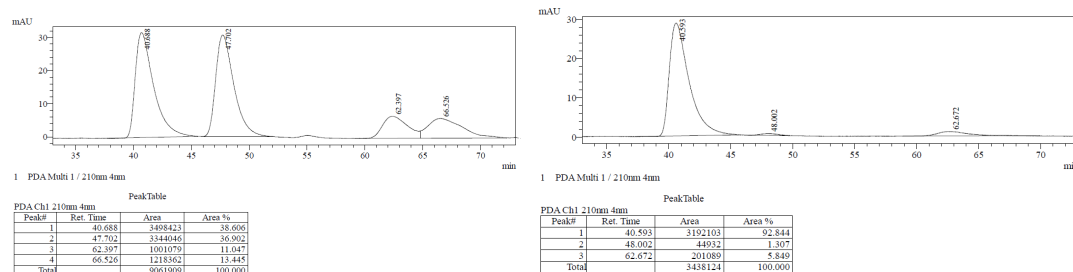

$^1\text{H}$  NMR (400 MHz,  $\text{CDCl}_3$ ):  $\delta$  6.98 (d,  $J = 8.4$  Hz, 1H), 6.79 (d,  $J = 2.4$  Hz, 1H), 6.73 (dd,  $J = 8.4, 2.6$  Hz, 1H), 6.28 (d,  $J = 9.5$  Hz, NH), 5.48 ( $\psi$ q,  $J = 4.8$  Hz, 1H), 3.74 (s, 3H), 3.67 (s, 3H), 3.04-3.00 (m, 1H), 2.79-2.65 (m, 2H), 2.16-2.03 (m, 2H), 2.00 (s, 3H).  $^{13}\text{C}$  NMR (101 MHz,  $\text{CDCl}_3$ ):  $\delta$  174.0, 169.6, 158.3, 137.0, 130.0, 127.7, 114.0, 112.6, 55.4, 52.0, 48.2, 44.0, 26.3, 23.5, 23.0. HRMS (ESI)  $m/z$ : Calcd for  $\text{C}_{15}\text{H}_{20}\text{NO}_4$   $[\text{M}+\text{H}]^+$ : 278.1392; Found: 278.1384.

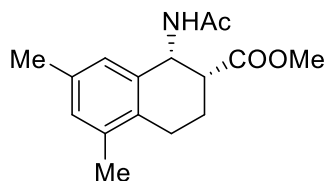

### (1*R*,2*R*)-Methyl 5,7-dimethyl-1-acetamidotetralin-2-carboxylate **4f**

The reaction was complete after 60 h at 80 °C. The product was isolated by flash chromatography (hexanes/EA 2:1) as white solid. 50 mg, 90% yield. Ee: 97%. 96/4 dr.  $[\alpha]_D^{21} = +62.9^\circ (c = 1.0, \text{CHCl}_3)$ .

Daicel Chiralcel OJ-H, *n*-hexane/isopropanol 98/2, flow rate = 0.5 mL/min.

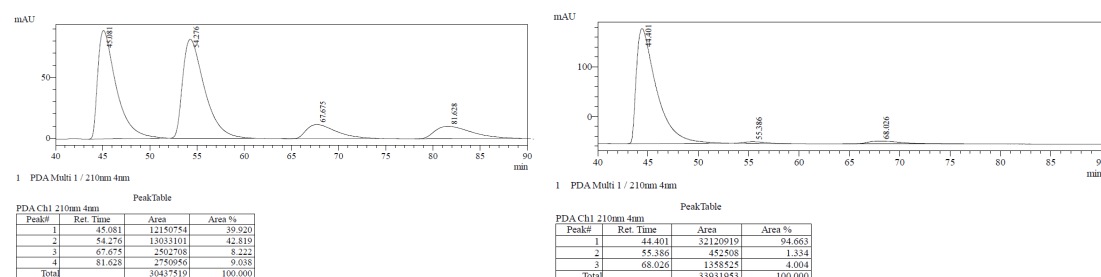

$^1\text{H}$  NMR (300 MHz,  $\text{CDCl}_3$ ):  $\delta$  6.97 (s, 1H), 6.90 (s, 1H), 6.14 (d,  $J = 9.5$  Hz, NH), 5.52 (dd,  $J = 9.6, 4.6$  Hz, 1H), 3.69 (s, 3H), 2.99 ( $\psi$ q,  $J = 5.7$  Hz, 1H), 2.72-2.51 (m, 2H), 2.26 (s, 3H), 2.18 (s, 3H), 2.15-2.09 (m, 2H), 2.01 (s, 3H).  $^{13}\text{C}$  NMR (76 MHz,  $\text{CDCl}_3$ ):  $\delta$  174.1, 169.5, 136.4, 135.9, 135.7, 131.2, 130.2, 126.5, 52.0, 48.3, 43.7, 24.5, 23.7, 22.4, 21.0, 19.6. HRMS (ESI)  $m/z$ : Calcd for  $\text{C}_{23}\text{H}_{33}\text{O}_2$   $[\text{M}+\text{H}]^+$ : 276.1599; Found: 276.1591.

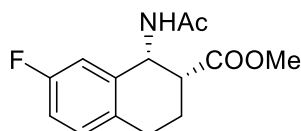

### (1R,2R)-Methyl 7-fluoro-1-acetamidotetralin-2-carboxylate 4g

The reaction was complete after 60 h at 80 °C. The product was isolated by flash chromatography (hexanes/EA 2:1) as white solid. 46 mg, 86% yield. Ee: 95%. 93/7 dr.  $[\alpha]_D^{20} = +17.7^\circ$  ( $c = 1.1$ ,  $\text{CHCl}_3$ ). Crystals were obtained from slow evaporation of a solution in a mixture of hexane and ethyl acetate. Crystals that were suitable for single-crystal X-ray diffraction was obtained from slow evaporation of a solution in a concentrated solution of hexane and DCM at rt. The configuration of the main isomer was determined to be cis.

Daicel Chiralcel OD-H, *n*-hexane/isopropanol 96/4, flow rate = 0.5 mL/min.

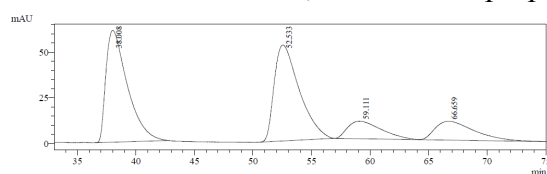

| PeakTable |           |          |         |
|-----------|-----------|----------|---------|
| Peak#     | Ret. Time | Area     | Area %  |
| 1         | 38.008    | 7763482  | 39.119  |
| 2         | 52.533    | 7832104  | 39.465  |
| 3         | 59.111    | 1003093  | 9.589   |
| 4         | 66.659    | 2347222  | 11.827  |
| Total     |           | 19845000 | 100.000 |

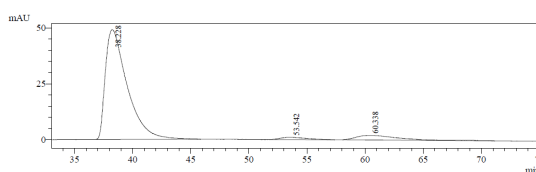

| PeakTable |           |         |         |
|-----------|-----------|---------|---------|
| Peak#     | Ret. Time | Area    | Area %  |
| 1         | 38.228    | 6422136 | 80.847  |
| 2         | 53.542    | 161149  | 2.280   |
| 3         | 60.338    | 485876  | 6.873   |
| Total     |           | 7069160 | 100.000 |

$^1\text{H}$  NMR (400 MHz,  $\text{CDCl}_3$ ):  $\delta$  7.03-6.95 (m, 2H), 6.85 (td,  $J = 8.4, 2.7$  Hz, 1H), 6.43 (d,  $J = 9.0$  Hz, NH), 5.48 ( $\psi$ q,  $J = 4.9$  Hz, 1H), 3.68 (s, 3H), 3.09-3.05 (m, 1H), 2.74 (t,  $J = 6.5$  Hz, 2H), 2.24-2.15 (m, 1H), 2.13-2.06 (m, 1H), 2.03 (s, 3H).  $^{13}\text{C}$  NMR (101 MHz,  $\text{CDCl}_3$ ):  $\delta$  173.9, 169.8, 161.5 ( $J_{\text{C-F}} = 244.3$  Hz), 138.1 ( $J_{\text{C-F}} = 6.7$  Hz), 131.1 ( $J_{\text{C-F}} = 3.1$  Hz), 130.4 ( $J_{\text{C-F}} = 7.8$  Hz), 114.6 ( $J_{\text{C-F}} = 21.5$  Hz), 113.9 ( $J_{\text{C-F}} = 21.9$  Hz), 52.1, 48.0, 43.6, 29.8, 26.1, 23.5.  $^{19}\text{F}$  NMR (376 MHz,  $\text{CDCl}_3$ ):  $\delta$  -116.2.

HRMS (ESI)  $m/z$ : Calcd for  $\text{C}_{14}\text{H}_{17}\text{FNO}_3$   $[\text{M}+\text{H}]^+$ : 266.1192; Found: 266.1198.

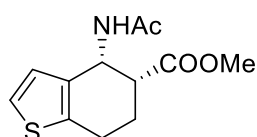

### (4R,5R)-Methyl 4-acetamido-4,5,6,7-tetrahydrobenzo[b]thiophene-5-carboxylate 4h

The reaction was complete after 60 h at 80 °C. The product was isolated by flash chromatography (hexanes/EA 2:1) as white solid. 46 mg, 91% yield. Ee: 94%. 97/3 dr.  $[\alpha]_D^{21} = +82.6^\circ$  ( $c = 1.0$ ,  $\text{CHCl}_3$ ).

Daicel Chiralcel AD-H, *n*-hexane/isopropanol 95/5, flow rate = 0.5 mL/min.

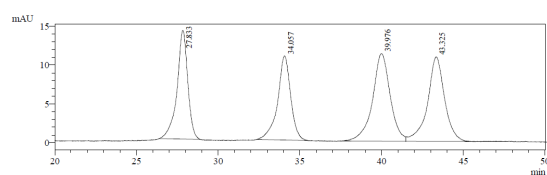

| PeakTable |           |         |         |
|-----------|-----------|---------|---------|
| Peak#     | Ret. Time | Area    | Area %  |
| 1         | 27.833    | 637992  | 23.132  |
| 2         | 34.057    | 603645  | 20.940  |
| 3         | 39.976    | 850033  | 29.488  |
| 4         | 43.325    | 796996  | 27.440  |
| Total     |           | 2882666 | 100.000 |

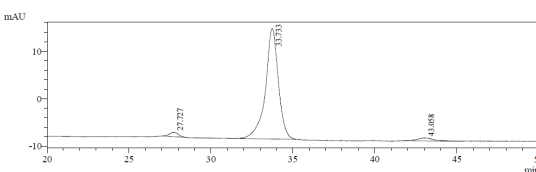

| PeakTable |           |         |         |
|-----------|-----------|---------|---------|
| Peak#     | Ret. Time | Area    | Area %  |
| 1         | 27.727    | 34081   | 2.570   |
| 2         | 33.733    | 1283047 | 94.275  |
| 3         | 43.058    | 42028   | 3.154   |
| Total     |           | 1360956 | 100.000 |

$^1\text{H}$  NMR (300 MHz,  $\text{CDCl}_3$ ):  $\delta$  7.07 (d,  $J = 5.2$  Hz, 1H), 6.86 (d,  $J = 5.2$  Hz, 1H), 6.15 (d,  $J = 9.2$  Hz, NH), 5.48 (q,  $J = 4.8$  Hz, 1H), 3.68 (s, 3H), 3.01 (q,  $J = 5.4$  Hz, 1H), 2.90-2.70 (m, 2H), 2.17-2.11 (m, 2H), 1.96 (s, 3H).  $^{13}\text{C}$  NMR (76 MHz,  $\text{CDCl}_3$ ):  $\delta$  173.7, 169.4, 136.9, 135.1, 126.6, 123.4, 52.0, 45.6, 44.0, 23.5, 23.3, 23.2. HRMS (ESI)  $m/z$ : Calcd for  $\text{C}_{12}\text{H}_{16}\text{NO}_3\text{S}$   $[\text{M}+\text{H}]^+$ : 254.0851; Found: 254.0846.

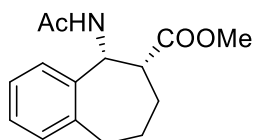

#### (5R,6R)-Methyl 5-acetamidobenzocycloheptene-6-carboxylate **4i**

The conversion was incomplete after 72 h at 80 °C using 10 mol% nickel catalyst. The product was isolated by flash chromatography (hexanes/EA 2:1) as white solid. 34 mg, 65% yield. Ee: 97%. 86/14 dr.  $[\alpha]_{\text{D}}^{20} = +81.1^\circ$  ( $c = 0.7$ ,  $\text{CHCl}_3$ ). Daicel Chiralcel OJ-H, *n*-hexane/isopropanol 90/10, flow rate = 0.5 mL/min.

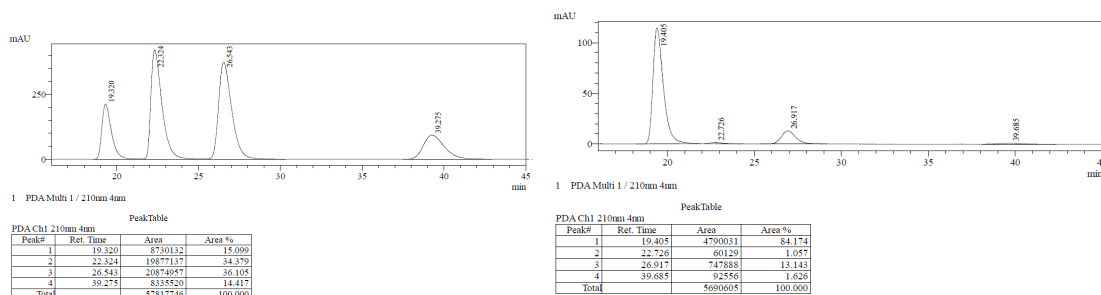

$^1\text{H}$  NMR (400 MHz,  $\text{CDCl}_3$ ):  $\delta$  7.25-7.21 (m, 1H), 7.18-7.14 (m, 2H), 7.11-7.08 (m, 1H), 5.94 (d,  $J = 7.2$  Hz, NH), 5.51 (Ψt,  $J = 7.8$  Hz, 1H), 3.63 (s, 3H), 3.00 (s, 3H), 2.93-2.79 (m, 2H), 2.18-2.08 (m, 1H), 2.02 (s, 3H), 1.94-1.81 (m, 2H), 1.69-1.59 (m, 1H).  $^{13}\text{C}$  NMR (101 MHz,  $\text{CDCl}_3$ ):  $\delta$  173.6, 169.1, 140.8, 138.5, 130.2, 128.1, 126.7, 54.9, 51.8, 47.5, 35.1, 28.8, 24.6, 23.5. HRMS (ESI)  $m/z$ : Calcd for  $\text{C}_{15}\text{H}_{20}\text{NO}_3$   $[\text{M}+\text{H}]^+$ : 262.1443; Found: 262.1440.

## VI. Reference

1. Yang, P.; Xu, H.; Zhou, J. S. *Angew. Chem., Int. Ed.* **2014**, 53, 12210-3.

## V. X-ray measurement and thermal ellipsoid plots of crystal structures

Intensity data of **4g** were collected at 100(2)K using a Bruker X8 diffractometer with fine-focus sealed tube Mo source. The structures were solved by Intrinsic Phasing (SHELXTL XT-2014) and refined by full-matrix least squares methods on  $F^2$  (Sheldrick, G. M. (2015). *Acta Cryst. A* **71**, 3-8). All non-hydrogen atoms were subjected to anisotropic refinement. The hydrogen atoms were generated geometrically and allowed to ride in their respective parent atoms; they were assigned appropriate

isotropic thermal parameters and included in the structure-factor calculations.

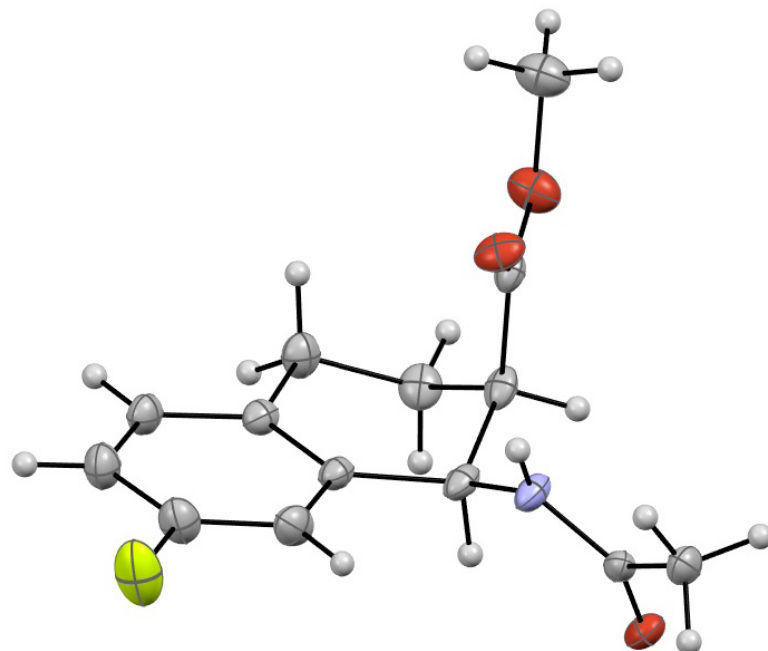

**Fig S1.** Thermal ellipsoid plot for crystal structure of compound **4g** (ellipsoid contour at 60% probability)
